# Supplementary material for: Transcriptional profiling of defense responses to Botrytis cinerea infection in leaves of Fragaria vesca plants soil-drenched with β-aminobutyric acid
Source: PubMed Central journal article supplement (PMC9772985; doi:10.3389/fpls.2022.1025422), 2022-12-08
Supplement: DataSheet_1.pdf [file DataSheet_1.pdf]

## Supplementary Material

### Supplementary Figures and Tables

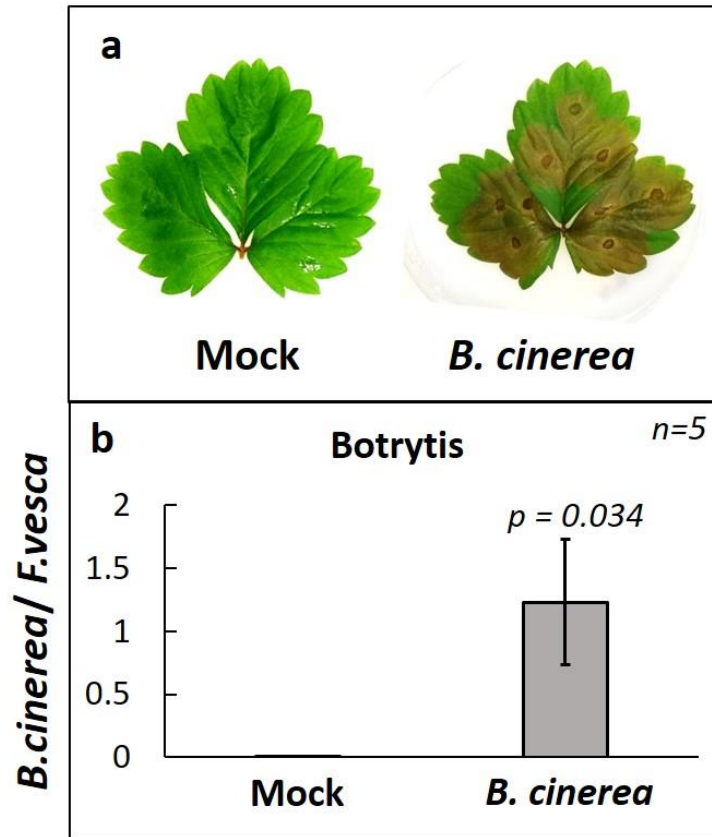

**Supplementary figure S1: Quantification method for *Botrytis cinerea* infection and verification of pathogenicity in *Fragaria vesca* leaves.** (a) Representative *F. vesca* 'Hawaii-4' leaves showing infection by *B. cinerea* 5 days after drop inoculation of fungal spores (right) or mock suspension (left). (b) Genomic DNA-based qPCR quantification of *B. cinerea* DNA relative to *F. vesca* DNA using genome-specific primers for *B. cinerea* (Bc3F and Bc3R) and *F. vesca* (EF1 $\alpha$ F and EF1 $\alpha$ R) in non-infected (Mock) and infected (*B. cinerea*) leaf samples. Y-axis values represents relative amount of *B. cinerea* DNA to *F. vesca* DNA. 'n' = number of replicates (i.e. individual plants). Error bars show standard error ( $\pm 1$  SE). P-values report comparisons between infected and uninfected plants using Student's t-test.

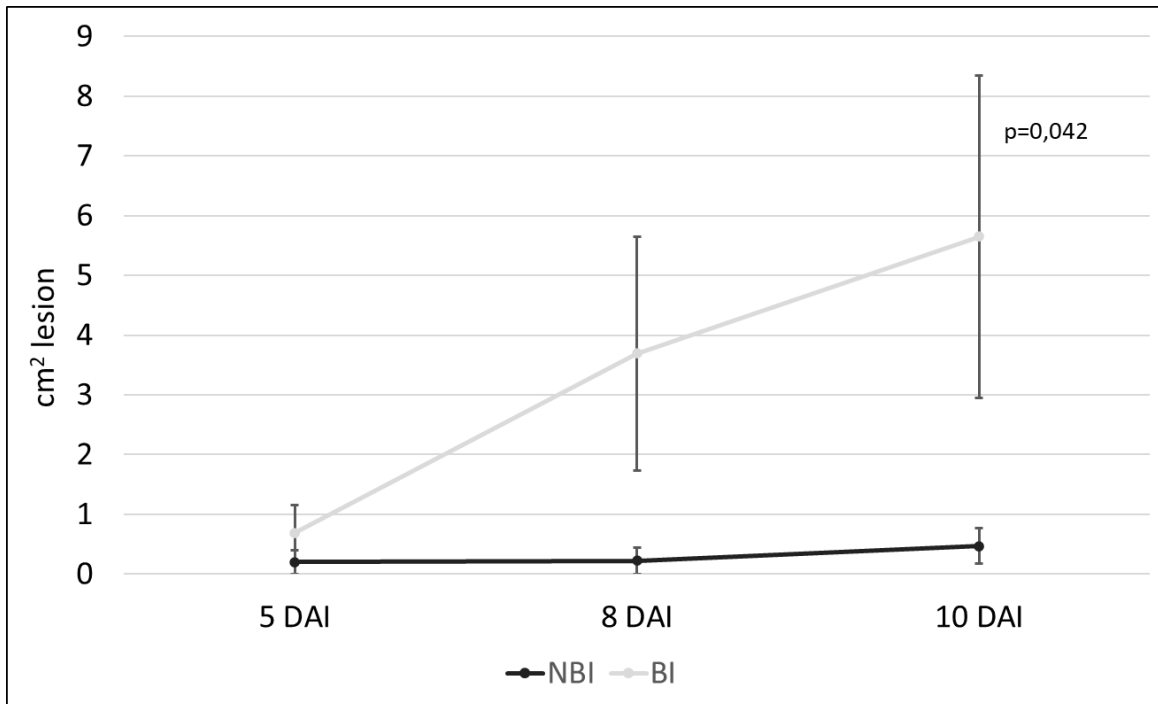

**Supplementary figure S2: Effects of BABA soil drench on resistance of *Fragaria ananassa* to infection with *Botrytis cinerea*.** Plants were soil drenched with water or 0.2 mM BABA 8 days prior to drop-inoculation of leaves with *B. cinerea* (No BABA and Infected (NBI) and BABA and Infected (BI), respectively). Measurement of lesion area (in cm<sup>2</sup>) was done using ImageJ of images taken 5, 8, and 10 days after inoculation. Values show average lesion area on infected detached leaves from 16 individual plants (n = 16). Error bars show standard error (±1 SE). P-values report significant comparisons between control plants (NBI) and plants treated with BABA (BI) using Student's t-test.

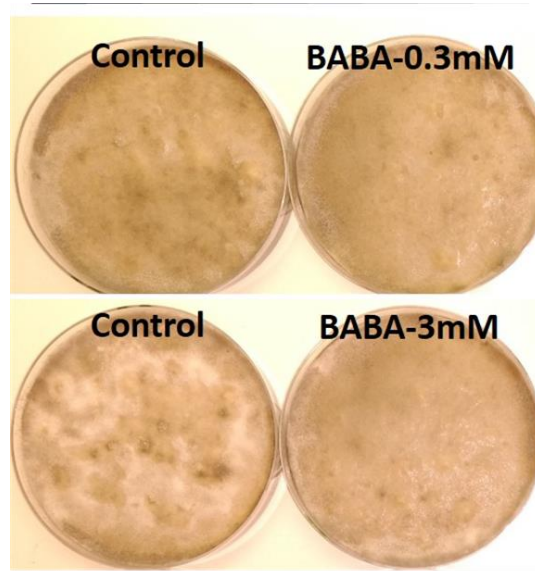

**Supplementary figure S3: Direct effects of BABA on *Botrytis cinerea* growth.** Growth of *B. cinerea* (brown mycelium) on potato dextrose agar amended with 0 mM, 0.3 mM, and 3 mM  $\beta$ -aminobutyric acid (BABA). A spore suspension of *B. cinerea* was spread on the agar and the plates were incubated in darkness for 4 weeks at room temperature.

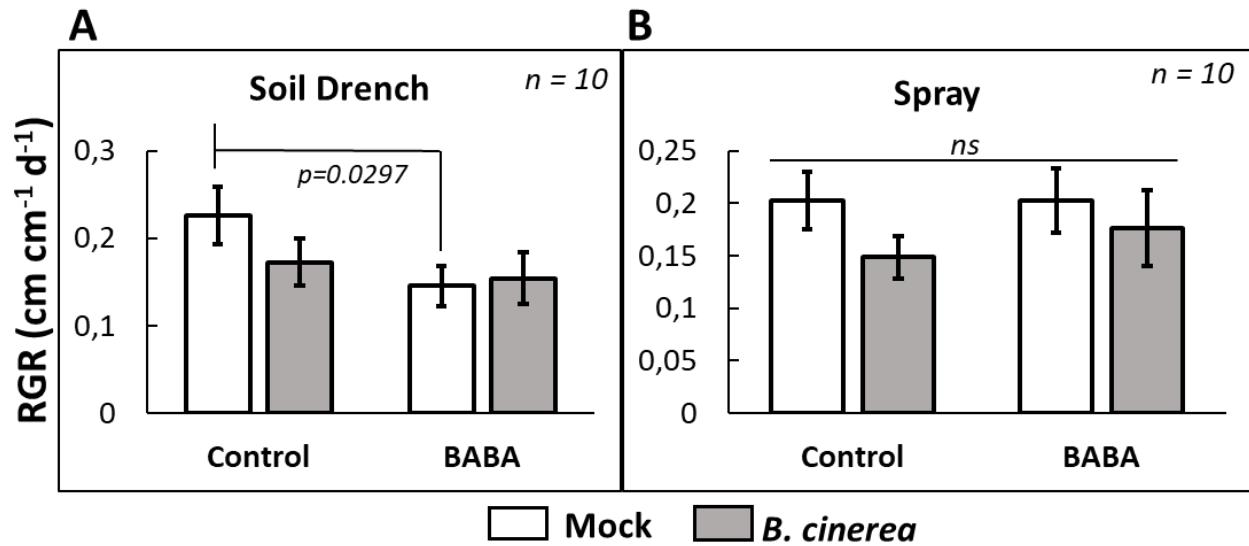

**Supplementary figure S4: Effect of BABA on relative growth rate (RGR) of *Fragaria vesca* ‘Hawaii-4’ plants.** RGR of plants that were (A) soil-drenched with 0.2 mM or (b) spray-treated with 0.3 mM  $\beta$ -aminobutyric acid (BABA). Control plants were treated with a suspension without BABA. All plants were subsequently infected with *Botrytis cinerea* spores or mock-infected. ‘ $n$ ’ = number of replicates (i.e. individual plants). Error bars show standard error ( $\pm 1$  SE). P-values report comparisons between treatment combinations using Student’s t-test. ‘ $ns$ ’ = not statistically significant.

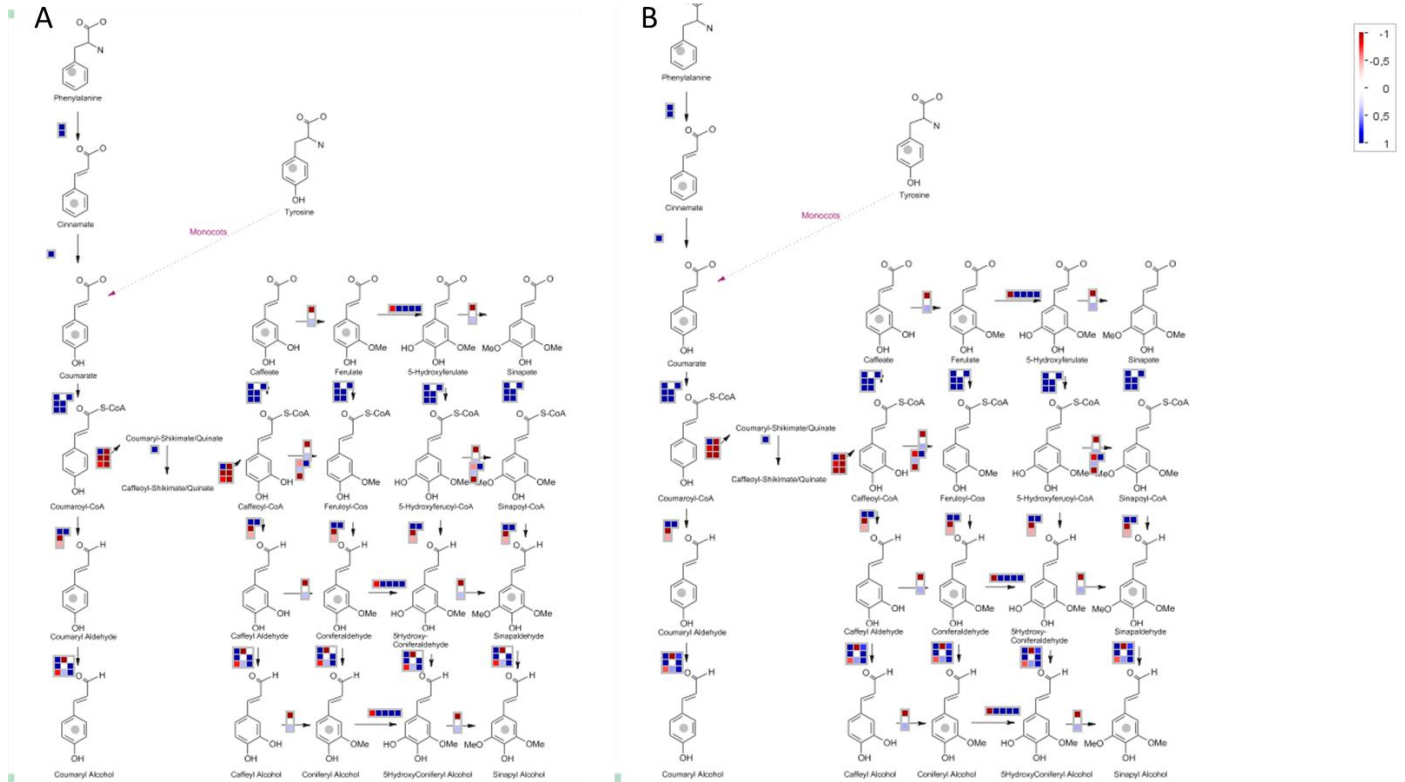

**Supplementary figure S5. Visualization of DEGs in the phenylpropanoid pathway in *Fragaria vesca* leaves after  $\beta$ -aminobutyric acid (BABA) treatment and *Botrytis cinerea* infection.** Differentially expressed genes (DEGs) were displayed onto metabolic pathways using the MAPMAN software. (A) *B. cinerea*-infected vs. mock-infected plants (No BABA and infected (NBI) vs. No BABA and non-infected (NBNI)). (B) BABA-treated and *B. cinerea*-infected plants vs. mock-infected plants (BABA and infected (BI) vs. NBNI). Blue cells: upregulation compared to NBNI; red cells: downregulation compared to NBNI.

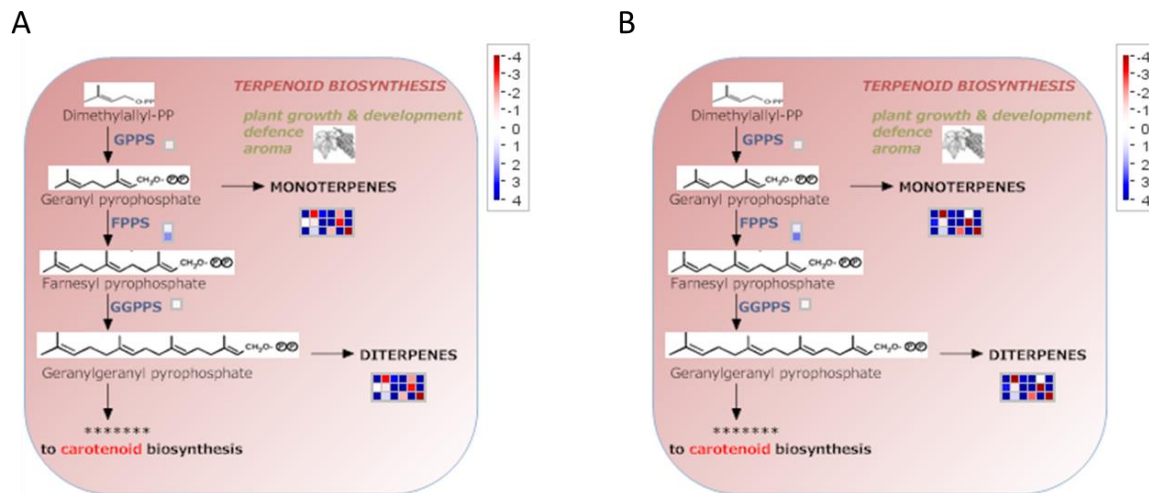

**Supplementary figure S6. Visualization of DEGs in the terpenoid biosynthesis pathway in *Fragaria vesca* leaves after  $\beta$ -aminobutyric acid (BABA) treatment and *Botrytis cinerea* infection.** Differentially expressed genes (DEGs) were displayed onto metabolic pathways using the MAPMAN software. (A) *B. cinerea*-infected vs. mock-infected plants (No BABA and infected (NBI) vs. No BABA and non-infected (NBNI)). (B) BABA-treated and *B. cinerea*-infected plants vs. mock-infected plants (BABA and infected (BI) vs. NBNI). Blue cells: upregulation compared to NBNI; red cells: downregulation compared to NBNI.

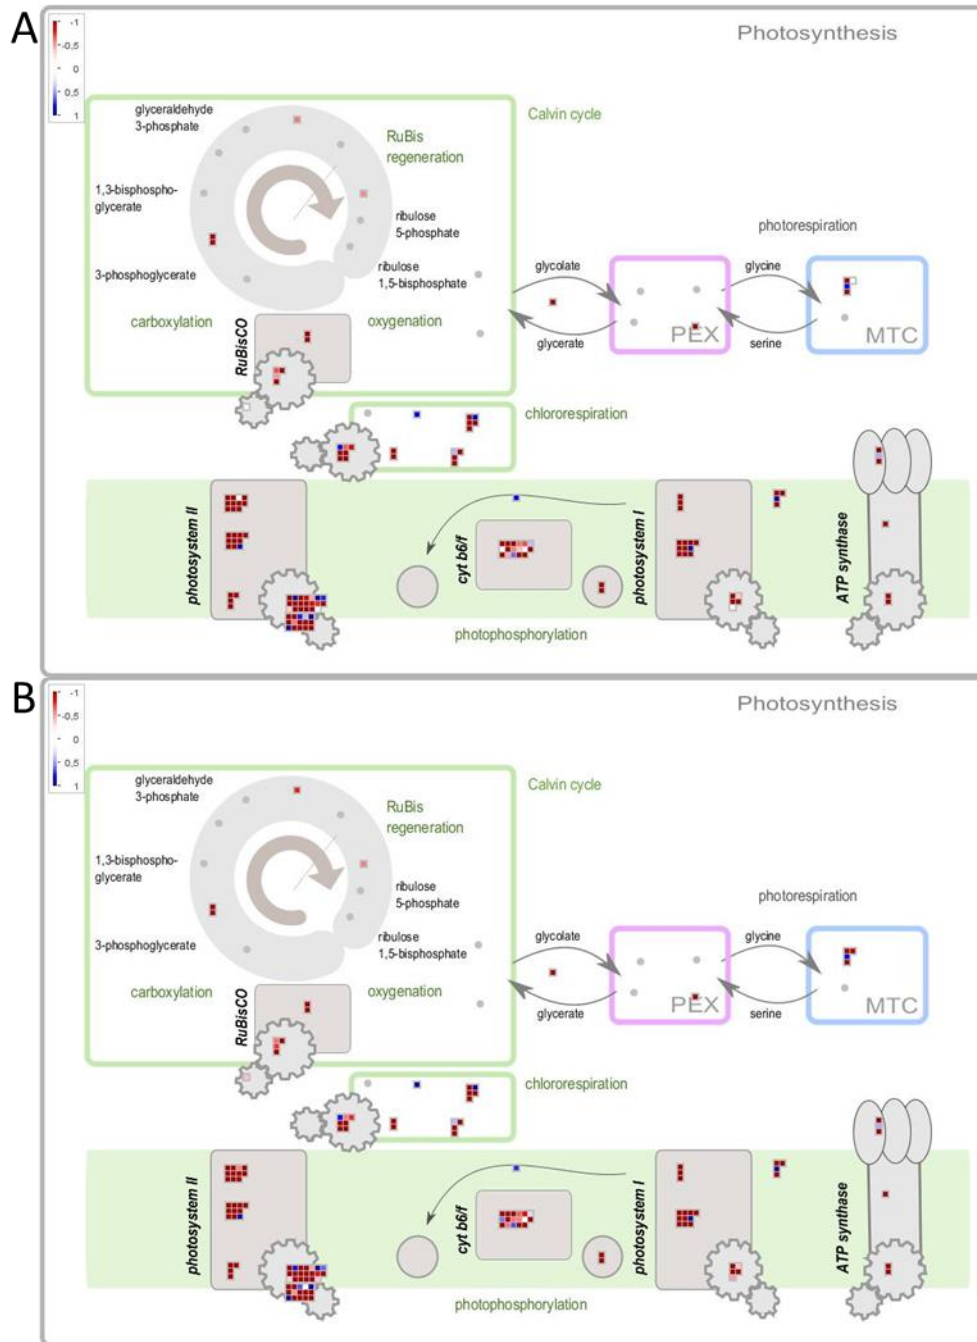

**Supplementary figure S7. Visualization of enriched DEGs in photosynthesis in *Fragaria vesca* leaves after  $\beta$ -aminobutyric acid (BABA) treatment and *Botrytis cinerea* infection.** Differentially expressed genes (DEGs) were displayed onto metabolic pathways using the MAPMAN software. (A) *B. cinerea*-infected vs. mock-infected plants (No BABA and infected (NBI) vs. No BABA and non-infected (NBNI)). (B) BABA-treated and *B. cinerea*-infected plants vs. mock-infected plants (BABA and infected (BI) vs. NBNI). Blue cells: upregulation compared to NBNI; red cells: downregulation compared to NBNI.

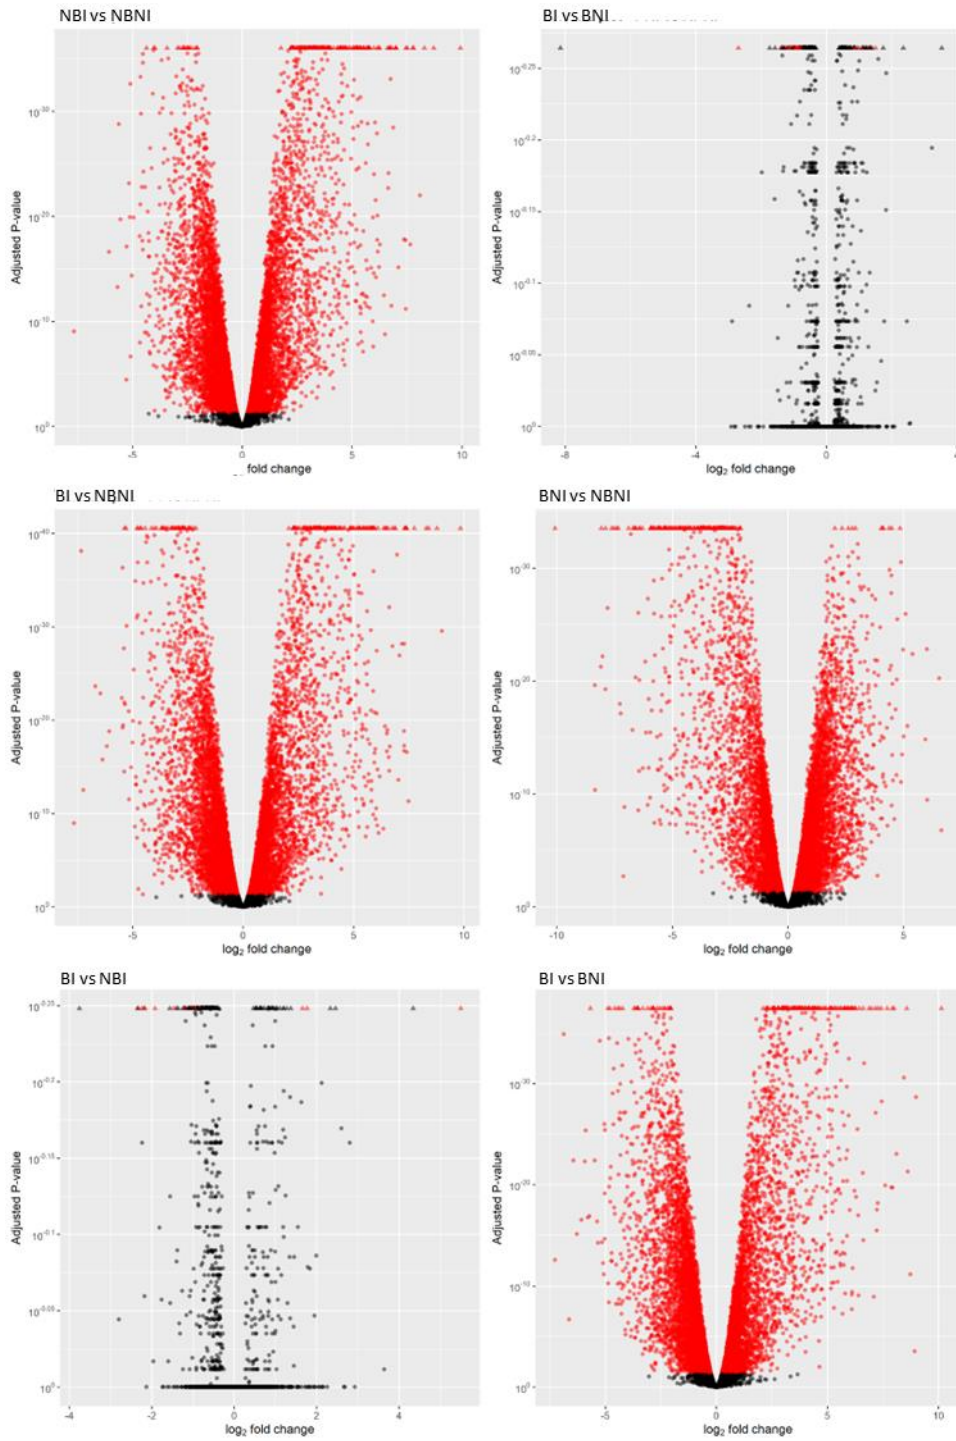



**Supplementary figure S8. Volcano plot (adjusted p-values versus log<sub>2</sub> fold-change based on edgeR data) of transcripts in leaves of *Fragaria vesca* Hawaii-4 plants following BABA treatment and infection with *Botrytis cinerea*.** Plants were treated with different combinations of 0.2 mM  $\beta$ -aminobutyric acid (BABA) as a soil drench and spray-inoculation of leaves with *B. cinerea* two days later. Transcripts with p-values < 0.05 are shown in red. (A) *Botrytis cinerea*-infected plants (No BABA and infected; NBI) vs. mock-infected plants (No BABA and non-infected; NBNI). (B) BABA-treated and mock-infected plants (BABA and non-infected; BNI) vs. NBNI. (C) BABA-treated and infected plants (BABA and infected; BI) vs. NBNI. (D) BNI vs. NBI. (E) BI vs. NBI. (F) BI vs. BNI.

A

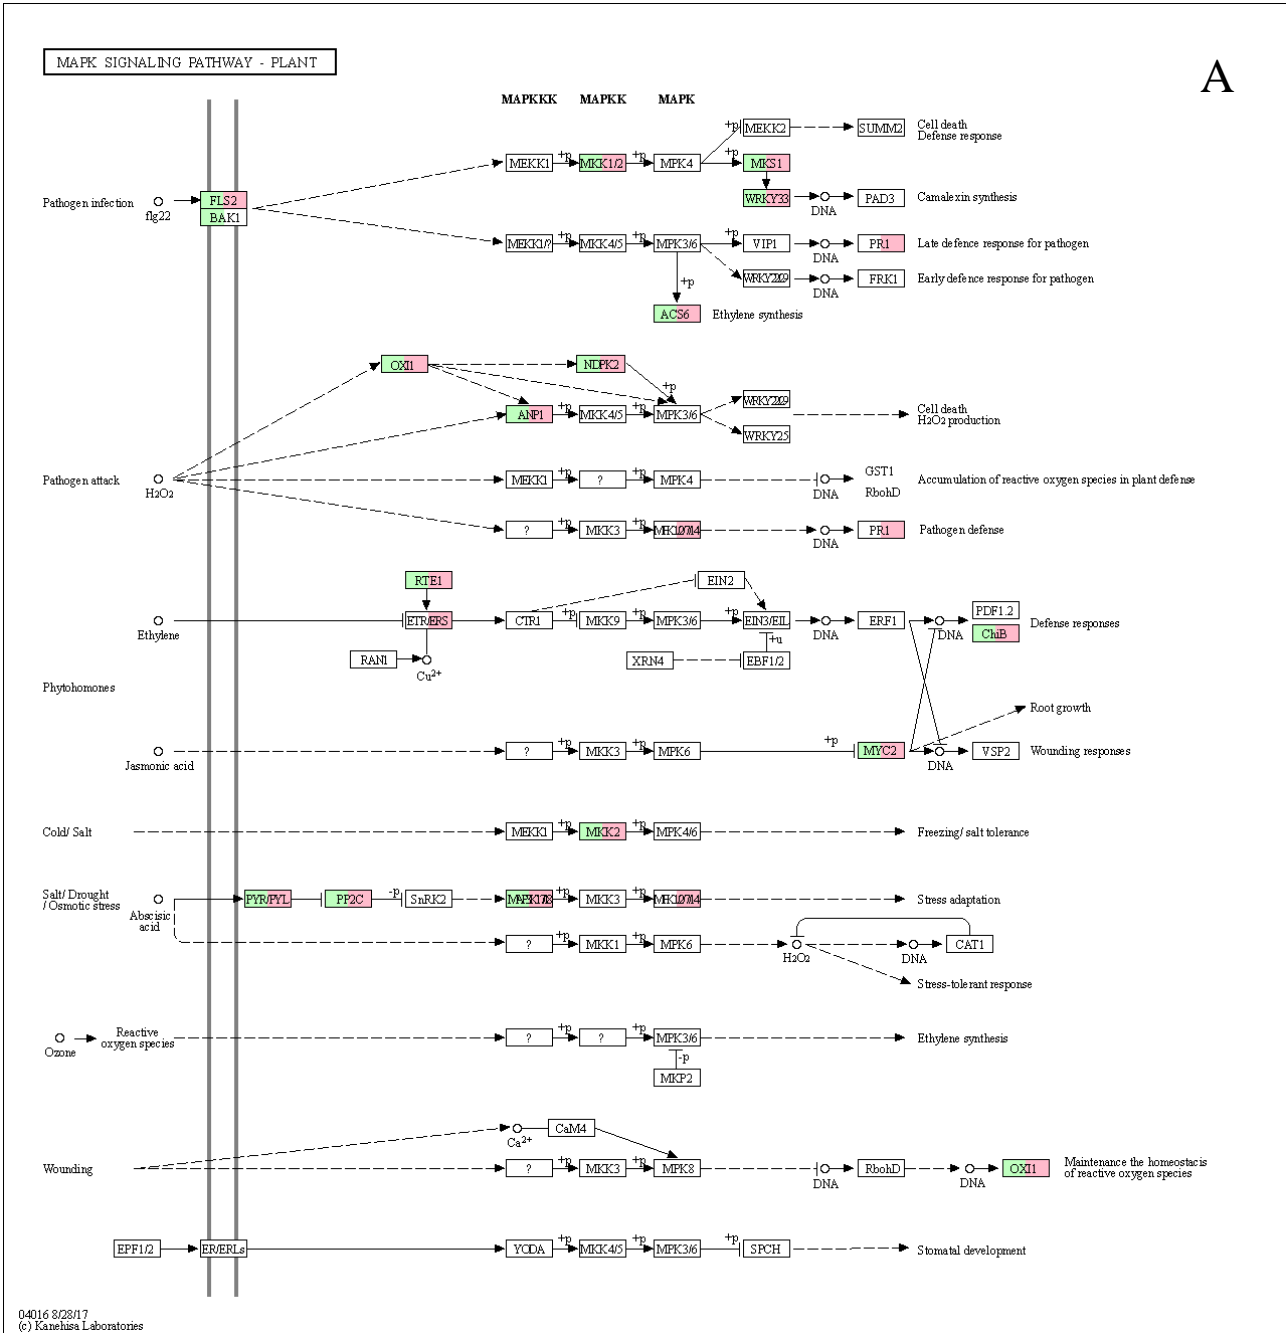

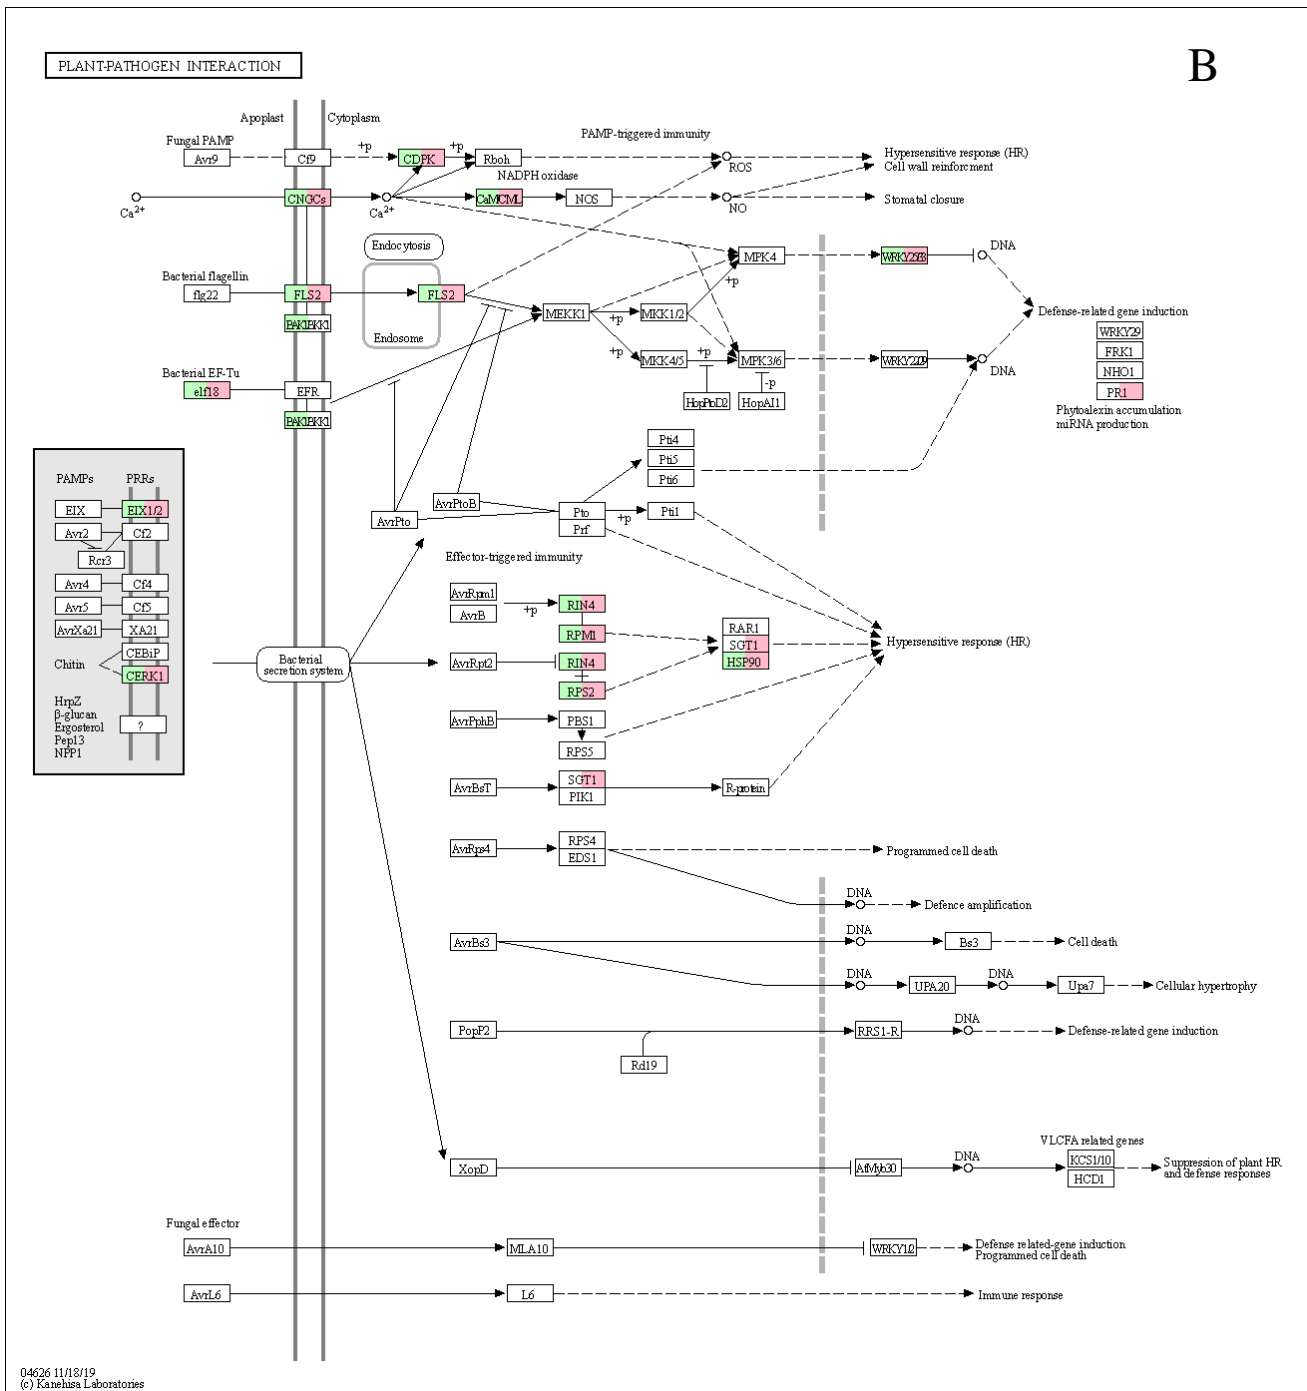

**Supplementary figure S9.** KEGG pathway analysis. Sequence data from the different treatments were assigned KO-numbers and mapped onto the MAPK signaling pathway - plant - Reference pathway (A) and the Plant-pathogen interaction - Reference pathway (B) to highlight similarities and differences between upregulated genes for the NBI vs NBNI (green) and the BI vs NBNI treatments.

**Supplementary Table S6: List of *Fragaria vesca* and *Botrytis cinerea* primers used in this study.**

| Sl No | Primer Name | Primer Sequence (5'-3')        | Gene IDs     | Purpose |
|-------|-------------|--------------------------------|--------------|---------|
| 1     | FvEF1aRTwF  | GCCCATGGTTGTTGAACTTT           | FvH4_7g20050 | qPCR    |
| 2     | FvEF1aRTR   | GGCGCATGTCCCTCACA              |              |         |
| 3     | FvPR1.1-RTF | CGGCGACTTATCAGGCACA            | FvH4_2g02920 |         |
| 4     | FvPR1.1-RTR | CCACAAACCCTGCCAGAAGC           |              |         |
| 5     | FvPR5.3F    | ACCTCCTAATGACACTCCCGAAACA      | FvH4_6g16950 |         |
| 6     | FvPR5.3R    | CGTAGTTAGGTCCACCGAAGCATGT<br>A |              |         |
| 7     | FvPR4-RTF   | GCAGGACAACAACCTGGGATTTG        | FvH4_3g26010 |         |
| 8     | FvPR4-RTR   | GTCACTAGCAGACATTTCCACAGG       |              |         |
| 9     | FvBG2-1RTF  | CCATATTGCTGCTCCTTGTTCTG        | FvH4_3g28370 |         |
| 10    | FvBG2-1RTR  | CCTTCCAATTCCATTGCTTTTGTAC      |              |         |
| 11    | FvBG2-3RTF  | CCCTAATAAACAGCCAAAGTATCAG<br>C | FvH4_4g19500 |         |
| 12    | FvBG2-3RTR  | CGTATCACTCTTGAGAGAAGTGG        |              |         |
| 13    | FvPGIP1-RTF | CCTAGTTCATACGGGAAATTCGTTG      | FvH4_6g22790 |         |
| 14    | FvPGIP1-RTR | TTCATGTTAGCAAATGAGGTTGGG       |              |         |
| 15    | FvLr10-JRTF | AACTCCTGCAGAGTATGCCAACTG       | FvH4_4g26920 |         |
| 16    | FvLr10-RTR  | GCGTTGCATGTGACCTCAAAC          |              |         |

|    |                   |                               |                  |
|----|-------------------|-------------------------------|------------------|
| 17 | FvWRKY75-<br>JRTR | CCCAGAAGCTACTATCGATGCAC       | FvH4_6g5377<br>0 |
| 18 | FvWRKY75-<br>RTR  | AGGCTTGTCGATTGGATGAGAGTG      |                  |
| 19 | FvCPK1-<br>JRTR   | TATGTCACCCTTGGGTTTCAGGTTG     | FvH4_6g2084<br>0 |
| 20 | FvCPK1-<br>JRTR   | GTGTTTCAGCAATGACTCTAAGAGCC    |                  |
| 21 | FvPecLy1-<br>JRTR | GACATGAGTATCCGCAACAGCAC       | FvH4_4g0576<br>0 |
| 22 | FvPecLy1-<br>RTR  | CACAACGCCAGCAATCATCAATG       |                  |
| 23 | FvSLP3-<br>JRTR   | CTAGTGAATCAGTCACGTCCTATGC     | FvH4_4g0737<br>0 |
| 24 | FvSLP3-<br>JRTR   | TTTCTGCCTGCTCGTGAGAAATG       |                  |
| 25 | FvARR3-<br>JRTR   | GAATCTCCTCTTGCAAAGTGACCG      | FvH4_4g3523<br>0 |
| 26 | FvARR3-<br>JRTR   | CCATCAAACCAACTGAGGTGCTC       |                  |
| 27 | FvPHOT2-<br>JRTR  | GAAACTGTTCGGTTTCTTCAGGGAC     | FvH4_2g1722<br>0 |
| 28 | FvPHOT2-<br>JRTR  | GTGAGAAGATTCCAGAAAGGAGTG<br>C |                  |
| 29 | FvDSLPR-<br>JRTR  | GGCGGAGGATTTTAGTGACACATTG     | FvH4_2g2029<br>0 |
| 30 | FvDSLPR-<br>JRTR  | CTATGCTTGCCTTGTGCTTGAGA       |                  |
| 31 | FvPAL2-RTF        | GAGGGCAGAGCTAGTAGAACATG       | FvH4_7g1913<br>0 |
| 32 | FvPAL2-<br>RTR    | TTAGGCAAGACACTCTTCAGTTCC      |                  |
| 33 | Fv4CL7-RTF        | CAAAGACGACGTCGTCCTTATCC       | FvH4_6g1646<br>0 |
| 34 | Fv4CL7-RTR        | GATGACGAGCTTAGGGTTACAGTC      |                  |
| 35 | FvGDS-RTF         | AATGGTTGTAGTTAACGAGCCTGC      |                  |

|    |              |                             |                                      |  |
|----|--------------|-----------------------------|--------------------------------------|--|
| 36 | FvGDS-RTR    | GCAGTAGTGTAAGGTCACCATCC     | FvH4_4g2794<br>0                     |  |
| 37 | FvBAS-RTF    | AGCACAAACAACCTTCGTCGGAAG    | FvH4_2g0804                          |  |
| 38 | FvBAS-RTR    | GAACTGAAGACGAGCCTCTTCAAC    | 0                                    |  |
| 39 | FvSCMT-RTF   | GAGAACCAGAGAGCTGTGATTTTCG   | FvH4_3g0313                          |  |
| 40 | FvSCMT-RTR   | TTCAGACACTCTGGGAAGAGAGTG    | 0                                    |  |
| 41 | Fv12OR2-RTF  | GCATGGAAACCCATTGTCAATGC     | FvH4_5g3263                          |  |
| 42 | Fv12OR2-RTR  | TCGGTACAAGAAATTGGAGCCTG     | 0                                    |  |
| 43 | FvACCOX1-RTF | GAGGTTCCAACCAACTATGACAGG    | FvH4_5g1929                          |  |
| 44 | FvACCOX1-RTR | CAGTTACTCCAGCATCAACAAGACC   | 0                                    |  |
| 45 | FvECDS-RTF   | TTCTTCCCTCAATCTGCAATGCG     | FvH4_2g2344                          |  |
| 46 | FvECDS-RTR   | TCCTTGGTAGGAAGAGCCTCTTC     | 0                                    |  |
| 47 | FvRe1 RTF    | TGAATATGAAGAGGCTTGCAAAGACTC |                                      |  |
| 48 | FvRe1 RTR    | TCTTCTCCATCCTAATCCCATTCTCTG |                                      |  |
| 49 | Bc3F         | GCTGTAATTTCAATGTGCAGAATCC   | (Diguta et al., 2010)                |  |
| 50 | Bc3R         | GGAGCAACAATTAATCGCATTTTC    | For <i>B. cinerea</i> quantification |  |
