# Supplementary material for: Transcriptional profiling of defense responses to Botrytis cinerea infection in leaves of Fragaria vesca plants soil-drenched with β-aminobutyric acid
Source: Front Plant Sci. 2022 Dec 8;13:1025422. doi: 10.3389/fpls.2022.1025422 (PMC9772985; doi:10.3389/fpls.2022.1025422)
Supplement: Supplementary file 2 [file Table_1.xlsx]

## Sheet: Supplementary table S1
Supplementary table S1. Number of DEGs calculated from pairwise comparision of gene expression. DEGs were filtered using false discovery rate (alpha) < 0.05 and absolute log2-fold change values > 1
Differentially expressed genes (DEGs) in Fragaria vesca Hawaii-4 leaves on plants soil-drenched with 0.2 mM β-aminobutyric acid (BABA) two days before spray-inoculation of leaves with Botrytis cinerea.
	Downregulated	Upregulated	Total
BABA/infected vs. No-BABA/non-infected	3035	2483	5518
BABA/infected vs. BABA/non-infected	2968	2237	5205
No BABA/infected vs. No-BABA/non-infected	2839	2461	5300
No BABA/infected vs. BABA/non-infected	2682	2189	4871
BABA/infected vs. No-BABA/infected	9	3	12
BABA/non-infected vs. No-BABA/non-infected	7	4	11
