# Supplementary material for: Transcriptional profiling of defense responses to Botrytis cinerea infection in leaves of Fragaria vesca plants soil-drenched with β-aminobutyric acid
Source: Front Plant Sci. 2022 Dec 8;13:1025422. doi: 10.3389/fpls.2022.1025422 (PMC9772985; doi:10.3389/fpls.2022.1025422)
Supplement: Supplementary file 4 [file Table_3.xlsx]

## Sheet: Supplementary table S3
Supplementary table S3. Unique DEGs identified in venn diagram in figure 3b and 3c, based on caculated log2 values in supplementary table S2 from pairwise comparisions of gene expression.
Down NPIvsNPNI/PNI	Down PIvsNPNI/PNI	Up NPIvsNPNI/PNI	Up PIvsNPNI/PNI
FvH4_6g09960	FvH4_3g25370	FvH4_2g02690	FvH4_7g08560
FvH4_3g08580	FvH4_5g36460	FvH4_3g26550	FvH4_4g03380
FvH4_1g12850	FvH4_1g13550	FvH4_1g19260	FvH4_7g29270
FvH4_6g10310	FvH4_5g35620	FvH4_3g24840	FvH4_2g02860
FvH4_6g14770	FvH4_2g16090	FvH4_3g43960	FvH4_4g33950
FvH4_6g25480	FvH4_5g08840	FvH4_4g31550	FvH4_7g08820
FvH4_1g19660	FvH4_5g35360	FvH4_5g12460	FvH4_3g37170
FvH4_1g27970	FvH4_7g32870	FvH4_1g19460	FvH4_3g34610
FvH4_6g43720	FvH4_5g25150	FvH4_5g04630	FvH4_3g18340
FvH4_1g27390	FvH4_7g11610	FvH4_4g35930	FvH4_5g04000
FvH4_6g24590	FvH4_6g50900	FvH4_6g14560	FvH4_5g12270
FvH4_5g34150	FvH4_4g12300	FvH4_5g35050	FvH4_3g43470
FvH4_2g29830	FvH4_3g39640	FvH4_3g23810	FvH4_3g29670
FvH4_6g06130	FvH4_2g25840	FvH4_5g21130	FvH4_6g44450
FvH4_3g11970	FvH4_7g06860	FvH4_1g20350	FvH4_4g06910
FvH4_3g30260	FvH4_4g21310	FvH4_4g01510	FvH4_4g20640
FvH4_6g07930	FvH4_6g24930	FvH4_4g14050	FvH4_7g01450
FvH4_5g16900	FvH4_4g05890	FvH4_2g25760	FvH4_6g52670
FvH4_7g20470	FvH4_7g09380	FvH4_1g15050	FvH4_2g00740
FvH4_2g39790	FvH4_2g35380	FvH4_6g49400	FvH4_7g14050
FvH4_7g17200	FvH4_7g17100	FvH4_3g44300	FvH4_6g37200
FvH4_6g32030	FvH4_3g28320	FvH4_2g25230	FvH4_1g10580
FvH4_6g53260	FvH4_6g53370	FvH4_6g48130	FvH4_4g37280
FvH4_6g27520	FvH4_3g29280	FvH4_7g24230	FvH4_3g17570
FvH4_7g28530	FvH4_2g24550	FvH4_7g03570	FvH4_6g43230
FvH4_c3g00110	FvH4_6g22250	FvH4_2g04090	FvH4_7g26430
FvH4_3g39340	FvH4_6g07870	FvH4_1g03650	FvH4_5g02890
FvH4_6g34810	FvH4_3g45680	FvH4_4g02830	FvH4_4g30470
FvH4_4g17250	FvH4_3g45570	FvH4_6g18620	FvH4_3g14580
FvH4_4g05980	FvH4_3g39780	FvH4_3g13690	FvH4_3g14340
FvH4_6g31440	FvH4_3g22740	FvH4_6g36820	FvH4_6g44260
FvH4_3g04780	FvH4_4g22490	FvH4_4g32050	FvH4_7g31530
FvH4_7g01070	FvH4_2g33130	FvH4_2g38000	FvH4_2g21720
FvH4_6g41700	FvH4_5g29890	FvH4_7g07960	FvH4_4g15970
FvH4_3g21090	FvH4_2g25050	FvH4_2g24540	FvH4_2g38060
FvH4_6g40250	FvH4_1g28620	FvH4_3g09500	FvH4_5g34240
FvH4_3g40390	FvH4_6g11550	FvH4_3g36350	FvH4_4g20720
FvH4_3g38380	FvH4_6g12590	FvH4_5g15030	FvH4_6g51870
FvH4_6g09880	FvH4_6g31900	FvH4_2g15320	FvH4_1g21100
FvH4_1g01610	FvH4_6g19530	FvH4_6g06160	FvH4_4g27260
FvH4_3g40670	FvH4_4g15590	FvH4_4g21080	FvH4_6g24090
FvH4_6g32290	FvH4_7g27350	FvH4_6g08090	FvH4_5g32980
FvH4_6g41040	FvH4_7g17650	FvH4_6g17750	FvH4_5g03960
FvH4_4g16430	FvH4_3g28600	FvH4_5g12820	FvH4_7g02740
FvH4_2g23030	FvH4_6g09160	FvH4_1g12800	FvH4_3g12730
FvH4_6g25550	FvH4_2g22910	FvH4_4g34630	FvH4_6g49580
FvH4_1g22870	FvH4_6g10990	FvH4_7g28660	FvH4_6g43120
FvH4_2g06990	FvH4_4g01370	FvH4_2g12730	FvH4_7g01410
FvH4_3g03400	FvH4_1g16750	FvH4_7g15320	FvH4_7g24310
FvH4_4g27620	FvH4_7g12470	FvH4_6g36600	FvH4_7g32220
FvH4_7g18230	FvH4_6g31600	FvH4_4g06700	FvH4_6g20550
FvH4_1g18320	FvH4_3g19250	FvH4_7g00060	FvH4_6g03550
FvH4_6g13340	FvH4_6g11320	FvH4_5g33150	FvH4_5g28350
FvH4_5g26770	FvH4_4g07580	FvH4_3g15940	FvH4_1g06210
FvH4_4g18160	FvH4_1g18030	FvH4_4g14550	FvH4_6g09540
FvH4_1g17550	FvH4_5g20140	FvH4_3g19980	FvH4_5g18590
FvH4_1g20760	FvH4_3g27750	FvH4_2g16640	FvH4_5g38670
FvH4_4g36330	FvH4_5g29300	FvH4_3g29470	FvH4_1g23840
FvH4_5g39730	FvH4_6g36950	FvH4_6g07860	FvH4_6g21940
FvH4_6g09060	FvH4_1g20810	FvH4_4g25440	FvH4_1g17470
FvH4_2g14170	FvH4_1g24710	FvH4_6g14880	FvH4_3g25790
FvH4_3g04300	FvH4_1g15930	FvH4_2g06830	FvH4_3g45630
FvH4_3g37140	FvH4_6g45510	FvH4_3g00130	FvH4_6g39860
FvH4_3g30490	FvH4_3g05050	FvH4_5g38470	FvH4_6g44250
FvH4_5g37450	FvH4_5g25260	FvH4_4g04640	FvH4_6g02090
FvH4_3g30620	FvH4_2g06580	FvH4_3g35960	FvH4_2g40040
FvH4_6g38500	FvH4_4g11480	FvH4_6g42100	FvH4_1g23400
FvH4_3g42520	FvH4_5g27340	FvH4_1g13430	FvH4_2g08690
FvH4_6g41240	FvH4_3g18130	FvH4_1g03520	FvH4_2g00230
FvH4_7g18210	FvH4_1g28180	FvH4_3g40700	FvH4_2g01480
FvH4_6g37970	FvH4_4g27070	FvH4_2g34400	FvH4_3g44780
FvH4_1g28140	FvH4_6g15400	FvH4_6g42800	FvH4_6g42700
FvH4_1g20560	FvH4_2g39150	FvH4_1g13420	FvH4_2g37820
FvH4_6g04000	FvH4_3g12180	FvH4_1g29790	FvH4_7g06040
FvH4_7g26070	FvH4_3g05620	FvH4_2g07360	FvH4_6g04950
FvH4_4g14580	FvH4_3g04690	FvH4_5g22530	FvH4_2g13470
FvH4_7g33740	FvH4_2g06100	FvH4_3g34450	FvH4_3g11950
FvH4_3g20760	FvH4_2g12740	FvH4_2g37970	FvH4_3g07050
FvH4_7g03500	FvH4_6g40880	FvH4_6g05370	FvH4_6g43530
FvH4_4g17470	FvH4_1g28130	FvH4_6g35300	FvH4_7g00170
FvH4_3g34130	FvH4_6g44960	FvH4_7g08540	FvH4_1g06850
FvH4_4g18300	FvH4_2g37990	FvH4_3g34290	FvH4_5g09330
FvH4_7g08700	FvH4_7g12730	FvH4_7g05430	FvH4_4g11880
FvH4_2g02980	FvH4_2g18630	FvH4_2g05910	FvH4_2g03890
FvH4_3g39250	FvH4_3g20580	FvH4_3g41910	FvH4_1g01320
FvH4_6g08480	FvH4_2g07370	FvH4_6g25030	FvH4_3g38980
FvH4_3g30680	FvH4_1g07070	FvH4_2g35360	FvH4_2g04510
FvH4_6g40400	FvH4_6g28470	FvH4_7g01500	FvH4_6g37460
FvH4_7g30790	FvH4_4g08670	FvH4_5g39410	FvH4_2g25870
FvH4_7g02970	FvH4_2g23670	FvH4_7g10600	FvH4_5g13370
FvH4_4g06560	FvH4_3g37640	FvH4_2g31380	FvH4_3g23790
FvH4_1g14850	FvH4_3g25110	FvH4_5g24990	FvH4_5g07140
FvH4_1g26550	FvH4_5g04830	FvH4_5g00420	FvH4_4g06280
FvH4_3g45930	FvH4_2g03270	FvH4_6g25150	FvH4_2g15730
FvH4_3g01140	FvH4_6g35340	FvH4_7g02550	FvH4_6g38720
FvH4_2g01670	FvH4_3g01510	FvH4_1g27280	FvH4_7g28150
FvH4_2g24300	FvH4_2g27300	FvH4_2g11810	FvH4_2g01040
FvH4_5g10570	FvH4_2g11710	FvH4_2g20260	FvH4_1g26050
FvH4_3g29930	FvH4_3g32200	FvH4_1g01100	FvH4_2g27720
FvH4_4g17360	FvH4_3g30100	FvH4_7g12930	FvH4_6g36430
FvH4_1g11470	FvH4_3g06230	FvH4_6g54330	FvH4_1g28560
FvH4_7g05470	FvH4_2g12250	FvH4_4g22800	FvH4_1g03900
FvH4_3g29010	FvH4_2g00120	FvH4_6g47520	FvH4_2g13060
FvH4_3g35490	FvH4_3g19840	FvH4_4g18230	FvH4_2g00030
FvH4_5g22990	FvH4_1g08180	FvH4_7g06800	FvH4_7g29650
FvH4_1g23520	FvH4_2g04110	FvH4_1g27070	FvH4_4g34480
FvH4_6g39830	FvH4_6g30310	FvH4_6g27790	FvH4_1g12060
FvH4_1g22880	FvH4_2g14020	FvH4_4g35260	FvH4_2g38180
FvH4_2g37330	FvH4_2g07140	FvH4_3g30590	FvH4_2g10600
FvH4_6g15260	FvH4_2g18860	FvH4_2g06150	FvH4_4g32120
FvH4_4g17380	FvH4_2g38660	FvH4_3g18140	FvH4_5g02320
FvH4_5g26040	FvH4_6g31710	FvH4_3g28880	FvH4_3g10780
FvH4_6g28260	FvH4_4g31330	FvH4_4g12670	FvH4_3g05790
FvH4_3g21810	FvH4_5g38390	FvH4_2g41200	FvH4_4g19580
FvH4_5g01860	FvH4_7g13210	FvH4_6g53190	FvH4_4g30750
FvH4_4g30180	FvH4_2g28610	FvH4_3g16020	FvH4_4g07660
FvH4_2g36450	FvH4_5g33520	FvH4_7g13750	FvH4_5g38970
FvH4_2g05740	FvH4_1g13700	FvH4_6g42010	FvH4_3g27200
FvH4_7g04900	FvH4_4g01820	FvH4_5g00530	FvH4_2g10430
FvH4_3g43650	FvH4_7g28950	FvH4_6g26190	FvH4_4g10270
FvH4_3g19940	FvH4_2g20910	FvH4_4g09770	FvH4_5g10390
FvH4_5g05510	FvH4_6g05920	FvH4_4g31560	FvH4_5g28690
FvH4_5g28190	FvH4_7g05880	FvH4_6g09110	FvH4_1g00550
FvH4_6g26860	FvH4_1g14120	FvH4_7g24210	FvH4_3g32410
FvH4_2g33400	FvH4_4g28410	FvH4_3g14000	FvH4_1g22750
FvH4_3g42180	FvH4_6g11630	FvH4_3g19420	FvH4_2g33100
FvH4_6g02380	FvH4_4g00610	FvH4_6g35350	FvH4_7g03600
FvH4_6g40000	FvH4_4g02100	FvH4_2g25550	FvH4_1g26970
FvH4_2g10880	FvH4_3g26770	FvH4_3g40020	FvH4_1g23240
FvH4_2g15930	FvH4_1g08330	FvH4_5g19120	FvH4_1g01170
FvH4_5g28280	FvH4_1g04880	FvH4_5g08230	FvH4_4g34830
FvH4_2g02210	FvH4_6g08730	FvH4_5g01360	FvH4_6g06560
FvH4_4g10950	FvH4_7g26470	FvH4_3g24280	FvH4_7g00630
FvH4_4g02380	FvH4_2g32620	FvH4_5g16620	FvH4_7g20140
FvH4_5g26080	FvH4_6g50730	FvH4_1g19890	FvH4_6g23450
FvH4_2g33690	FvH4_7g08940	FvH4_7g22530	FvH4_1g04000
FvH4_7g15900	FvH4_2g07620	FvH4_2g19070	FvH4_7g06960
FvH4_3g25020	FvH4_3g07510	FvH4_6g34640	FvH4_1g09640
FvH4_5g28520	FvH4_7g20220	FvH4_1g05760	FvH4_6g49310
FvH4_2g36780	FvH4_2g20150	FvH4_4g13880	FvH4_2g22100
FvH4_7g14210	FvH4_7g00380	FvH4_1g21670	FvH4_6g13590
FvH4_2g20870	FvH4_6g49680	FvH4_5g01730	FvH4_1g14560
FvH4_5g18360	FvH4_7g08660	FvH4_5g06270	FvH4_3g23800
FvH4_5g16070	FvH4_3g04630	FvH4_2g40500	FvH4_5g11800
FvH4_3g20900	FvH4_6g18100	FvH4_6g35020	FvH4_2g06240
FvH4_6g09570	FvH4_1g24740	FvH4_6g30490	FvH4_2g24430
FvH4_3g37180	FvH4_2g00090	FvH4_2g32140	FvH4_6g02240
FvH4_6g23430	FvH4_4g17900	FvH4_6g18190	FvH4_7g31850
FvH4_2g11060	FvH4_2g02220	FvH4_2g38850	FvH4_1g15430
FvH4_1g07040	FvH4_6g43580	FvH4_1g17000	FvH4_2g18640
FvH4_2g26950	FvH4_5g32870	FvH4_2g25370	FvH4_2g31990
FvH4_6g19740	FvH4_4g31400	FvH4_3g36800	FvH4_2g41070
FvH4_1g02200	FvH4_1g28890	FvH4_4g12840	FvH4_6g39620
FvH4_3g45850	FvH4_7g33970	FvH4_2g31120	FvH4_7g04670
FvH4_7g16520	FvH4_7g07850	FvH4_2g02960	FvH4_1g15860
FvH4_2g20950	FvH4_3g45510	FvH4_3g27240	FvH4_6g37420
FvH4_2g08220	FvH4_4g36160	FvH4_6g43170	FvH4_3g14400
FvH4_3g10370	FvH4_4g07050	FvH4_2g00800	FvH4_3g38970
FvH4_2g00130	FvH4_6g43830	FvH4_6g35170	FvH4_3g45610
FvH4_2g14620	FvH4_3g14530	FvH4_6g10650	FvH4_2g15430
FvH4_2g30600	FvH4_4g00590	FvH4_5g14210	FvH4_3g36840
FvH4_5g29160	FvH4_1g17420	FvH4_4g25910	FvH4_2g36040
FvH4_6g11830	FvH4_6g15850	FvH4_4g29830	FvH4_2g33660
FvH4_6g29550	FvH4_1g16690	FvH4_3g26940	FvH4_2g06030
FvH4_3g44520	FvH4_2g29540	FvH4_3g08230	FvH4_1g17860
FvH4_7g06660	FvH4_3g14650	FvH4_6g42560	FvH4_1g02380
FvH4_7g33030	FvH4_5g22500	FvH4_4g18770	FvH4_5g01930
FvH4_1g26770	FvH4_7g10180	FvH4_5g16000	FvH4_3g43880
FvH4_7g33080	FvH4_6g28940	FvH4_5g20460	FvH4_4g04760
FvH4_2g27090	FvH4_5g28030	FvH4_5g21150	FvH4_5g18500
FvH4_4g24910	FvH4_6g15370	FvH4_5g23910	FvH4_5g18110
FvH4_7g22680	FvH4_1g12780	FvH4_5g11480	FvH4_3g25080
FvH4_5g38850	FvH4_4g10350	FvH4_1g04290	FvH4_4g25900
FvH4_1g12220	FvH4_2g20740	FvH4_7g15010	FvH4_7g03170
FvH4_2g05490	FvH4_2g35760	FvH4_3g38740	FvH4_5g14810
FvH4_3g29370	FvH4_1g16650	FvH4_5g34540	FvH4_1g09170
FvH4_2g18390	FvH4_1g09620	FvH4_6g40500	FvH4_1g25580
FvH4_1g16010	FvH4_7g27870	FvH4_4g00010	FvH4_7g30590
FvH4_5g29850	FvH4_5g39020	FvH4_5g22870	FvH4_5g18990
FvH4_1g10250	FvH4_6g34070	FvH4_4g34260	FvH4_5g05610
FvH4_4g12210	FvH4_5g14370	FvH4_6g14730	FvH4_5g29820
FvH4_6g47430	FvH4_4g23220	FvH4_3g04860	FvH4_6g21390
FvH4_5g05840	FvH4_7g15540	FvH4_5g28140	FvH4_7g06920
FvH4_6g48370	FvH4_2g23100	FvH4_4g36590	FvH4_4g27750
FvH4_2g15820	FvH4_3g15480	FvH4_2g08030	FvH4_2g08240
FvH4_1g15160	FvH4_4g24620	FvH4_7g22820	FvH4_5g32170
FvH4_4g08010	FvH4_6g12100	FvH4_7g07890	FvH4_1g14880
FvH4_4g15330	FvH4_4g03740	FvH4_5g11520	FvH4_2g29480
FvH4_7g27050	FvH4_4g21830	FvH4_1g24180	FvH4_2g29470
FvH4_4g23650	FvH4_2g12990	FvH4_7g00890	FvH4_5g18820
FvH4_4g17660	FvH4_3g16960	FvH4_1g01590	FvH4_3g30750
FvH4_7g16390	FvH4_3g19650	FvH4_1g02580	FvH4_6g02970
FvH4_2g02710	FvH4_2g01010	FvH4_6g38730	FvH4_3g34020
FvH4_7g12270	FvH4_7g07070	FvH4_3g04340	FvH4_2g09120
FvH4_7g09900	FvH4_6g10340	FvH4_4g15020	FvH4_6g10610
FvH4_5g29650	FvH4_4g01630	FvH4_4g07930	FvH4_2g12510
FvH4_7g26350	FvH4_6g40750	FvH4_3g23080	FvH4_6g05420
FvH4_6g25170	FvH4_5g06000	FvH4_2g12620	FvH4_5g32990
FvH4_6g38920	FvH4_1g20150	FvH4_6g43890	FvH4_7g01120
FvH4_2g39630	FvH4_7g07680	FvH4_6g39950	FvH4_5g15360
FvH4_5g01810	FvH4_5g26180	FvH4_2g03540	FvH4_5g34250
FvH4_6g00910	FvH4_3g12160	FvH4_6g20260	FvH4_7g03190
FvH4_4g15410	FvH4_2g23560	FvH4_7g04950	FvH4_3g26560
FvH4_4g35920	FvH4_4g04820	FvH4_6g23840	FvH4_6g19210
FvH4_6g28550	FvH4_2g13800	FvH4_3g28180	FvH4_6g20910
FvH4_6g48110	FvH4_7g32160	FvH4_4g37030	FvH4_6g50700
FvH4_5g38760	FvH4_1g17130	FvH4_5g38530	FvH4_5g21140
FvH4_2g10330	FvH4_3g38330	FvH4_7g07730	FvH4_2g16960
FvH4_2g20800	FvH4_7g13730	FvH4_5g17550	FvH4_2g04060
FvH4_4g27800	FvH4_1g23870	FvH4_3g14570	FvH4_1g07530
FvH4_6g14590	FvH4_5g16180	FvH4_5g10740	FvH4_6g15910
FvH4_3g12510	FvH4_2g24960	FvH4_7g09950	FvH4_7g30600
FvH4_6g04070	FvH4_4g05580	FvH4_2g18140	FvH4_7g14300
FvH4_3g11120	FvH4_6g31160	FvH4_5g30620	FvH4_1g26350
FvH4_6g07840	FvH4_1g00590	FvH4_6g41470	FvH4_2g23900
FvH4_6g09980	FvH4_4g21140	FvH4_2g27210	FvH4_5g17320
FvH4_1g08790	FvH4_4g18100	FvH4_5g11580	FvH4_2g36340
FvH4_4g07400	FvH4_4g06530	FvH4_5g17660	FvH4_2g23390
FvH4_5g10870	FvH4_6g42240	FvH4_4g20910	FvH4_3g45230
FvH4_1g03770	FvH4_6g22600	FvH4_4g21460	FvH4_4g03300
FvH4_4g00800	FvH4_1g09090	FvH4_6g33030	FvH4_1g09500
FvH4_7g07920	FvH4_6g38070	FvH4_6g26280	FvH4_2g09440
FvH4_2g32040	FvH4_6g39400	FvH4_6g20290	FvH4_4g00810
FvH4_2g31930	FvH4_1g04560	FvH4_2g38530	FvH4_3g12650
FvH4_4g09630	FvH4_6g41050	FvH4_1g08110	FvH4_5g14060
FvH4_2g40670	FvH4_7g29900	FvH4_6g38630	FvH4_4g07310
FvH4_2g30110	FvH4_5g22880	FvH4_3g03660	FvH4_6g37640
FvH4_2g33080	FvH4_6g13510	FvH4_6g27990	FvH4_3g31950
FvH4_6g30250	FvH4_7g02130	FvH4_3g41720	FvH4_7g13690
FvH4_3g31600	FvH4_2g23740	FvH4_3g09370	FvH4_1g06580
FvH4_6g08560	FvH4_6g46610	FvH4_3g09270	FvH4_2g06660
FvH4_5g03900	FvH4_7g12790	FvH4_5g33190	FvH4_3g23630
FvH4_2g23130	FvH4_6g29830	FvH4_6g26540	FvH4_7g30530
FvH4_2g26920	FvH4_1g02710	FvH4_3g24000	FvH4_4g33530
FvH4_1g15670	FvH4_1g19610	FvH4_2g03150	FvH4_4g11450
FvH4_2g35280	FvH4_5g03130	FvH4_5g12750	FvH4_2g04650
FvH4_3g02240	FvH4_6g42150	FvH4_6g46030	FvH4_2g11720
FvH4_6g32520	FvH4_3g01280	FvH4_3g24520	FvH4_4g10620
FvH4_6g07600	FvH4_4g29700	FvH4_3g01910	FvH4_6g49530
FvH4_1g16340	FvH4_2g14040	FvH4_4g00150	FvH4_6g29960
FvH4_2g18200	FvH4_2g10690	FvH4_1g06430	FvH4_1g03970
FvH4_4g25290	FvH4_6g50610	FvH4_5g39010	FvH4_3g22420
FvH4_2g18400	FvH4_6g48380	FvH4_7g30730	FvH4_7g12760
FvH4_3g13390	FvH4_2g17730	FvH4_3g41150	FvH4_2g17370
FvH4_5g24510	FvH4_5g39170	FvH4_1g23900	FvH4_5g00820
FvH4_7g32330	FvH4_2g14370	FvH4_7g31260	FvH4_6g37520
FvH4_3g34560	FvH4_6g22920	FvH4_7g25800	FvH4_2g20350
FvH4_6g04480	FvH4_4g13210	FvH4_7g28780	FvH4_6g49180
FvH4_5g37420	FvH4_6g23150	FvH4_6g27250	FvH4_5g24740
FvH4_2g38780	FvH4_2g20310	FvH4_5g22120	FvH4_6g26920
FvH4_7g10710	FvH4_3g36060	FvH4_7g04490	FvH4_2g25070
FvH4_5g27940	FvH4_4g12880	FvH4_6g51690	FvH4_7g12540
FvH4_3g13370	FvH4_5g09490	FvH4_2g04580	FvH4_3g41300
FvH4_1g08690	FvH4_2g34840	FvH4_5g10400	FvH4_6g07090
FvH4_5g07370	FvH4_3g24030	FvH4_3g23430	FvH4_7g20620
FvH4_3g34750	FvH4_6g13050	FvH4_2g23850	FvH4_1g00530
FvH4_2g00330	FvH4_5g11410	FvH4_5g09240	FvH4_5g39500
FvH4_5g28960	FvH4_6g40930	FvH4_3g23450	FvH4_5g05150
FvH4_7g05110	FvH4_2g06380	FvH4_3g39610	FvH4_1g23920
FvH4_4g02560	FvH4_2g41430	FvH4_6g36880	FvH4_1g02550
FvH4_4g08120	FvH4_2g09630	FvH4_5g03310	FvH4_7g25700
FvH4_2g07400	FvH4_6g16140	FvH4_2g14930	FvH4_3g19480
FvH4_5g30090	FvH4_4g11360	FvH4_7g28220	FvH4_5g30460
FvH4_7g11450	FvH4_6g20850	FvH4_6g24610	FvH4_3g30520
FvH4_3g44610	FvH4_5g25470	FvH4_3g42580	FvH4_1g23620
FvH4_4g32450	FvH4_6g26590	FvH4_7g04520	FvH4_3g05070
FvH4_4g30010	FvH4_1g13740	FvH4_6g20040	FvH4_6g26000
FvH4_4g32200	FvH4_2g17760	FvH4_5g17590	FvH4_3g26230
FvH4_2g18680	FvH4_7g20600	FvH4_3g09710	FvH4_3g28070
FvH4_1g06540	FvH4_7g06480	FvH4_3g35210	FvH4_1g03380
FvH4_1g27380	FvH4_5g10450	FvH4_6g23620	FvH4_1g07860
FvH4_4g26230	FvH4_6g35010	FvH4_4g05000	FvH4_7g14540
FvH4_3g19610	FvH4_6g19460	FvH4_7g14490	FvH4_7g05380
FvH4_4g05800	FvH4_2g35220	FvH4_2g18960	FvH4_2g08940
FvH4_3g42090	FvH4_5g04770	FvH4_7g12580	FvH4_2g15680
FvH4_4g02460	FvH4_2g25170	FvH4_2g08830	FvH4_7g09880
FvH4_1g04060	FvH4_6g14290	FvH4_7g04360	FvH4_7g08600
FvH4_1g15650	FvH4_6g47560	FvH4_6g43150	FvH4_5g33540
FvH4_2g11650	FvH4_6g11340	FvH4_7g31110	FvH4_7g07320
FvH4_2g01740	FvH4_5g25730	FvH4_1g05380	FvH4_4g11950
FvH4_1g04050	FvH4_2g05860	FvH4_6g11260	FvH4_2g41220
FvH4_5g09000	FvH4_3g00090	FvH4_3g13050	FvH4_4g19320
FvH4_6g30980	FvH4_6g20310	FvH4_1g20370	FvH4_4g37310
FvH4_c3g00140	FvH4_6g02360	FvH4_6g27960	FvH4_6g18970
FvH4_c3g00150	FvH4_1g16460	FvH4_3g02260	FvH4_6g19350
FvH4_c3g00100	FvH4_5g00950	FvH4_3g09930	FvH4_7g02790
FvH4_7g19350	FvH4_5g21430	FvH4_4g13110	FvH4_6g13070
FvH4_1g20680	FvH4_6g03430	FvH4_3g20540	FvH4_2g40470
FvH4_6g17700	FvH4_2g11950	FvH4_6g16440	FvH4_1g16910
FvH4_2g41300	FvH4_3g21710	FvH4_5g34820	FvH4_3g42500
FvH4_4g28570	FvH4_3g41080	FvH4_2g33450	FvH4_5g31950
FvH4_3g42160	FvH4_6g51490	FvH4_4g28700	FvH4_5g03630
FvH4_2g39350	FvH4_1g27040	FvH4_5g14920	FvH4_3g34720
FvH4_4g30460	FvH4_5g19480	FvH4_6g51840	FvH4_3g00760
FvH4_2g14670	FvH4_1g07280	FvH4_7g18990	FvH4_6g32190
FvH4_7g06210	FvH4_1g05460	FvH4_7g07460	FvH4_4g35630
FvH4_1g04090	FvH4_2g40450	FvH4_5g06690	FvH4_7g08550
FvH4_7g30360	FvH4_7g09830	FvH4_2g13710	FvH4_5g19810
FvH4_4g12730	FvH4_1g11540	FvH4_4g32090	FvH4_7g08860
FvH4_5g09620	FvH4_6g04240	FvH4_7g30400	FvH4_3g39300
FvH4_1g16170	FvH4_1g04960	FvH4_7g21890	FvH4_7g33480
FvH4_2g34440	FvH4_1g11650	FvH4_6g31990	FvH4_6g08420
FvH4_5g19280	FvH4_6g19950	FvH4_1g12360	FvH4_1g03570
FvH4_7g05870	FvH4_3g00260	FvH4_3g23910	FvH4_1g29000
FvH4_4g03810	FvH4_2g18840	FvH4_7g20360	FvH4_3g33900
FvH4_1g04920	FvH4_3g26260	FvH4_2g00430	FvH4_5g14720
FvH4_3g39110	FvH4_1g22140	FvH4_2g35820	FvH4_3g10580
FvH4_5g13120	FvH4_7g03700	FvH4_2g13680	FvH4_6g28660
FvH4_5g34560	FvH4_3g36940	FvH4_2g30560	FvH4_1g14080
FvH4_5g08870	FvH4_6g53220	FvH4_3g02280	FvH4_6g32630
FvH4_4g33840	FvH4_2g39250	FvH4_1g09750	FvH4_2g15690
FvH4_5g05820	FvH4_5g05620	FvH4_5g19150	FvH4_2g17510
FvH4_4g35620	FvH4_3g33450	FvH4_2g08380	FvH4_4g37060
FvH4_4g09640	FvH4_1g27090	FvH4_6g21140	FvH4_3g02000
FvH4_3g21890	FvH4_6g36080	FvH4_4g22010	FvH4_3g34790
FvH4_6g27620	FvH4_4g14470	FvH4_1g25930	FvH4_3g34040
FvH4_7g15260	FvH4_4g03770	FvH4_4g21840	FvH4_5g02760
FvH4_3g34690	FvH4_2g37600	FvH4_7g13330	FvH4_7g08720
FvH4_5g25340	FvH4_5g03680	FvH4_6g48290	FvH4_6g45060
FvH4_6g09280	FvH4_7g31120	FvH4_6g49670	FvH4_1g05260
FvH4_6g11400	FvH4_1g29170	FvH4_2g12480	FvH4_7g11570
FvH4_5g18040	FvH4_4g10360	FvH4_6g16890	FvH4_1g19480
FvH4_6g29520	FvH4_2g20920	FvH4_5g07340	FvH4_3g33260
FvH4_4g18140	FvH4_2g07130	FvH4_3g24010	FvH4_7g06760
FvH4_4g01220	FvH4_5g34170	FvH4_6g35040	FvH4_7g09470
FvH4_2g34960	FvH4_2g37090	FvH4_1g06810	FvH4_6g19930
FvH4_1g17870	FvH4_7g15620	FvH4_2g20290	FvH4_2g06970
FvH4_2g12340	FvH4_7g30010	FvH4_6g02170	FvH4_1g11570
FvH4_7g22640	FvH4_7g24230	FvH4_7g00830	FvH4_2g18540
FvH4_6g48630	FvH4_5g36540	FvH4_2g38840	FvH4_1g24060
FvH4_7g01540	FvH4_5g01620	FvH4_1g16470	FvH4_6g08350
FvH4_5g03790	FvH4_5g10290	FvH4_2g10650	FvH4_6g04870
FvH4_3g12000	FvH4_6g32780	FvH4_5g22860	FvH4_3g00860
FvH4_2g36140	FvH4_6g22640	FvH4_5g09200	FvH4_3g31410
FvH4_5g02430	FvH4_2g38480	FvH4_1g21870	FvH4_2g24970
FvH4_1g23210	FvH4_2g20620	FvH4_6g46110	FvH4_3g41250
FvH4_5g25560	FvH4_1g11830	FvH4_1g11960	FvH4_4g01800
FvH4_7g15700	FvH4_7g02710	FvH4_2g37290	FvH4_3g17990
FvH4_1g16630	FvH4_6g07060	FvH4_3g39370	FvH4_6g30910
FvH4_7g03770	FvH4_6g17120	FvH4_7g04400	FvH4_4g14540
FvH4_6g48060	FvH4_5g29860	FvH4_6g32960	FvH4_7g06360
FvH4_3g35330	FvH4_4g13500	FvH4_6g46950	FvH4_4g05560
FvH4_5g11210	FvH4_5g08860	FvH4_7g17090	FvH4_1g24290
FvH4_5g09350	FvH4_3g42340	FvH4_2g16610	FvH4_6g48260
FvH4_7g24880	FvH4_5g02300	FvH4_3g02350	FvH4_7g24240
FvH4_6g22420	FvH4_3g44880	FvH4_6g01790	FvH4_4g21320
FvH4_5g13000	FvH4_3g02420	FvH4_1g16670	FvH4_3g10030
FvH4_4g35600	FvH4_5g25460	FvH4_6g46460	FvH4_3g22590
FvH4_3g22720	FvH4_3g20340	FvH4_1g15030	FvH4_6g30660
FvH4_6g15730	FvH4_1g30230	FvH4_1g19380	FvH4_1g00340
FvH4_1g01960	FvH4_4g37080	FvH4_4g24800	FvH4_5g05040
FvH4_3g36400	FvH4_3g15420	FvH4_6g32310	FvH4_3g02850
FvH4_5g29260	FvH4_6g02300	FvH4_1g23980	FvH4_4g07840
FvH4_5g34630	FvH4_1g00130	FvH4_6g24890	FvH4_2g08300
FvH4_7g07030	FvH4_3g39500	FvH4_1g23660	FvH4_4g12190
FvH4_3g44070	FvH4_1g20090	FvH4_6g39360	FvH4_1g03110
FvH4_4g29640	FvH4_5g28780	FvH4_6g03930	FvH4_5g32960
FvH4_6g47590	FvH4_3g17280	FvH4_5g06330	FvH4_4g15760
FvH4_2g35840	FvH4_6g44590	FvH4_5g33950	FvH4_7g08280
FvH4_4g16990	FvH4_3g39890	FvH4_4g03920	FvH4_7g07500
FvH4_7g10550	FvH4_5g16480	FvH4_2g03990	FvH4_5g11070
FvH4_7g09620	FvH4_4g08490	FvH4_5g32910	FvH4_6g49660
FvH4_4g04350	FvH4_6g04750	FvH4_1g10850	FvH4_1g09810
FvH4_3g32150	FvH4_3g01860	FvH4_6g07800	FvH4_6g52830
FvH4_6g20500	FvH4_2g07250	FvH4_6g06510	FvH4_1g00360
FvH4_5g17780	FvH4_6g50660	FvH4_5g01920	FvH4_2g35630
FvH4_6g26520	FvH4_1g15890	FvH4_2g21700	FvH4_6g00010
FvH4_3g11670	FvH4_7g20570	FvH4_2g40220	FvH4_1g27610
FvH4_6g44520	FvH4_1g02070	FvH4_2g32130	FvH4_4g27640
FvH4_7g03640	FvH4_4g14780	FvH4_6g41100	FvH4_5g14590
FvH4_1g29450	FvH4_3g13760	FvH4_1g14740	FvH4_5g20770
FvH4_5g27810	FvH4_1g05600	FvH4_6g11900	FvH4_3g37160
FvH4_3g01770	FvH4_6g16970	FvH4_3g40250	FvH4_1g00830
FvH4_1g21410	FvH4_1g28000	FvH4_5g13280	FvH4_6g29900
FvH4_5g02100	FvH4_4g34230	FvH4_7g07420	FvH4_3g35390
FvH4_2g12920	FvH4_1g25370	FvH4_7g27560	FvH4_2g24850
FvH4_6g22310	FvH4_1g12740	FvH4_7g20560	FvH4_2g08630
FvH4_3g45000	FvH4_3g11740	FvH4_4g02020	FvH4_6g23790
FvH4_5g21690	FvH4_3g13330	FvH4_4g33560	FvH4_6g17420
FvH4_6g32700	FvH4_5g12100	FvH4_5g19060	FvH4_6g15320
FvH4_1g15880	FvH4_4g07060	FvH4_4g24710	FvH4_3g15350
FvH4_3g08780	FvH4_6g24170	FvH4_3g37450	FvH4_2g36360
FvH4_5g09920	FvH4_5g33560	FvH4_2g31390	FvH4_7g32890
FvH4_6g32340	FvH4_2g32500	FvH4_6g40140	FvH4_6g29040
FvH4_1g09760	FvH4_4g11630	FvH4_6g26830	FvH4_3g36490
FvH4_5g31560	FvH4_6g14900	FvH4_5g22350	FvH4_2g14580
FvH4_1g19320	FvH4_3g23220	FvH4_1g21690	FvH4_6g49020
FvH4_6g47970	FvH4_6g43380	FvH4_2g38570	FvH4_6g34790
FvH4_6g18890	FvH4_4g13160	FvH4_1g08400	FvH4_7g15070
FvH4_6g19440	FvH4_1g19010	FvH4_5g01400	FvH4_2g28300
FvH4_6g54490	FvH4_4g34630	FvH4_6g17970	FvH4_6g21130
FvH4_7g03720	FvH4_6g18080	FvH4_4g29660	FvH4_2g24300
FvH4_3g44390	FvH4_5g34360	FvH4_6g14610	FvH4_3g42740
FvH4_6g28490	FvH4_2g37840	FvH4_5g11440	FvH4_4g33570
FvH4_2g17860	FvH4_3g45800	FvH4_7g13650	FvH4_6g18590
FvH4_4g07080	FvH4_1g20840	FvH4_3g02430	FvH4_4g16730
FvH4_2g08140	FvH4_3g38420	FvH4_4g29020	FvH4_4g25710
FvH4_6g19780	FvH4_1g05000	FvH4_7g32000	FvH4_6g27070
FvH4_4g14310	FvH4_3g38890	FvH4_2g35460	FvH4_5g06620
FvH4_3g45740	FvH4_3g29570	FvH4_2g01180	FvH4_3g19340
FvH4_4g08190	FvH4_1g12240	FvH4_2g38150	FvH4_6g43430
FvH4_5g39750	FvH4_7g09050	FvH4_4g34460	FvH4_6g22570
FvH4_5g32820	FvH4_4g29330	FvH4_5g21000	FvH4_6g43520
FvH4_3g38510	FvH4_2g33910	FvH4_3g29050	FvH4_6g49790
FvH4_1g05470	FvH4_5g17570	FvH4_5g06380	FvH4_6g23690
FvH4_7g18040	FvH4_4g04970	FvH4_5g31720	FvH4_4g13790
FvH4_6g15880	FvH4_7g24250	FvH4_3g07080	FvH4_2g31530
FvH4_5g17620	FvH4_2g29010	FvH4_3g04970	FvH4_4g14280
FvH4_4g18460	FvH4_7g06830	FvH4_7g21920	FvH4_2g15110
FvH4_3g27110	FvH4_6g27790	FvH4_7g12280	FvH4_1g24410
FvH4_4g07250	FvH4_2g05350	FvH4_5g25870	FvH4_6g01930
FvH4_6g06300	FvH4_6g40380	FvH4_6g14340	FvH4_7g08040
FvH4_6g36650	FvH4_7g10470	FvH4_6g11100	FvH4_1g25340
FvH4_1g19570	FvH4_6g53760	FvH4_1g08760	FvH4_5g17740
FvH4_1g19310	FvH4_1g10150	FvH4_5g27880	FvH4_3g32210
FvH4_2g17330	FvH4_6g15410	FvH4_1g03730	FvH4_6g28720
FvH4_6g26360	FvH4_2g34400	FvH4_4g10710	FvH4_7g06400
FvH4_5g38280	FvH4_5g02610	FvH4_2g07010	FvH4_5g03580
FvH4_c3g00090	FvH4_1g21750	FvH4_6g07390	FvH4_5g02390
FvH4_2g06330	FvH4_5g17400	FvH4_5g34510	FvH4_5g19650
FvH4_3g46110	FvH4_2g00250	FvH4_1g09140	FvH4_5g02640
FvH4_6g44530	FvH4_1g14730	FvH4_7g16830	FvH4_3g31960
FvH4_5g33740	FvH4_2g14640	FvH4_3g15360	FvH4_5g18200
FvH4_6g12070	FvH4_2g34930	FvH4_4g36670	FvH4_4g07150
FvH4_3g38680	FvH4_7g02100	FvH4_1g03320	FvH4_6g41280
FvH4_2g24930	FvH4_2g30990	FvH4_6g04960	FvH4_2g10310
FvH4_2g26330	FvH4_5g19210	FvH4_7g31100	FvH4_1g15810
FvH4_5g36750	FvH4_3g03740	FvH4_5g18540	FvH4_1g00480
FvH4_4g34030	FvH4_6g31540	FvH4_1g22450
FvH4_4g10870	FvH4_6g54430	FvH4_4g14980
FvH4_3g13820	FvH4_3g18660	FvH4_4g11840
FvH4_6g43770	FvH4_6g30850	FvH4_5g28870
FvH4_5g12880	FvH4_5g12790	FvH4_1g27870
FvH4_6g46680	FvH4_4g35990	FvH4_4g12380
FvH4_5g26460	FvH4_1g06870	FvH4_2g40970
FvH4_7g08360	FvH4_6g37080	FvH4_3g30730
FvH4_4g28260	FvH4_2g29840	FvH4_4g14840
FvH4_6g31820	FvH4_1g01560	FvH4_3g30390
FvH4_3g40860	FvH4_1g04510	FvH4_3g07890
FvH4_7g06090	FvH4_2g00170	FvH4_5g36690
FvH4_2g34330	FvH4_7g04800	FvH4_5g14940
FvH4_2g35180	FvH4_4g35010	FvH4_3g37030
FvH4_6g14870	FvH4_6g53840	FvH4_6g18690
FvH4_3g00540	FvH4_7g16280	FvH4_3g15770
FvH4_6g14140	FvH4_2g17900	FvH4_3g18600
FvH4_4g28360	FvH4_2g24980	FvH4_4g37340
FvH4_1g28690	FvH4_2g16950	FvH4_5g26020
FvH4_6g28050	FvH4_1g30420	FvH4_7g05480
FvH4_4g00580	FvH4_6g18380	FvH4_6g11590
FvH4_7g19440	FvH4_7g16630	FvH4_1g03720
FvH4_5g20640	FvH4_1g15710	FvH4_5g21630
FvH4_5g04660	FvH4_4g30090	FvH4_2g22480
FvH4_6g01710	FvH4_6g52520	FvH4_5g26490
FvH4_3g10020	FvH4_7g25420	FvH4_4g23150
FvH4_6g07520	FvH4_5g09340	FvH4_5g21170
FvH4_4g03070	FvH4_7g11840	FvH4_2g18460
FvH4_5g32320	FvH4_4g20920	FvH4_5g23990
FvH4_3g31040	FvH4_1g25960	FvH4_2g29600
FvH4_6g44490	FvH4_3g17770	FvH4_6g19330
FvH4_7g18540	FvH4_4g32060	FvH4_4g34680
FvH4_2g38290	FvH4_6g00450	FvH4_6g23820
FvH4_1g00030	FvH4_5g15700	FvH4_7g08380
FvH4_4g08300	FvH4_2g35080	FvH4_4g36970
FvH4_4g25050	FvH4_4g30160	FvH4_2g12970
FvH4_5g07650	FvH4_3g16500	FvH4_7g10840
FvH4_7g28100	FvH4_4g32640	FvH4_5g05230
FvH4_6g38870	FvH4_6g48670	FvH4_5g19540
FvH4_1g01930	FvH4_5g25950	FvH4_2g35970
FvH4_6g41760	FvH4_4g34070	FvH4_7g00600
FvH4_7g11160	FvH4_6g30940	FvH4_3g13560
FvH4_4g26560	FvH4_6g16580	FvH4_6g49250
FvH4_7g13140	FvH4_4g26660	FvH4_6g08040
FvH4_6g50170	FvH4_6g54270	FvH4_2g16530
FvH4_4g23740	FvH4_2g03400	FvH4_1g01010
FvH4_3g38290	FvH4_6g45670	FvH4_3g45950
FvH4_4g00660	FvH4_7g33430	FvH4_4g21030
FvH4_6g20360	FvH4_3g33360	FvH4_4g34100
FvH4_1g11640	FvH4_6g12470	FvH4_4g25930
FvH4_3g12320	FvH4_3g09030	FvH4_6g51430
FvH4_6g46350	FvH4_5g38490	FvH4_2g12680
FvH4_3g05460	FvH4_1g29620	FvH4_6g52650
FvH4_2g27840	FvH4_3g00010	FvH4_7g01850
FvH4_1g16580	FvH4_6g41550	FvH4_3g18630
FvH4_3g03200	FvH4_7g10170	FvH4_6g40470
FvH4_7g17930	FvH4_7g29950	FvH4_4g10290
FvH4_4g01880	FvH4_7g34290	FvH4_7g03760
FvH4_5g00060	FvH4_3g01630	FvH4_4g37380
FvH4_3g12200	FvH4_3g06300	FvH4_5g35740
FvH4_3g24930	FvH4_6g14570	FvH4_1g02820
FvH4_5g29790	FvH4_6g20300	FvH4_2g36050
FvH4_1g07030	FvH4_1g12420	FvH4_7g05840
FvH4_6g53910	FvH4_4g11280	FvH4_1g28080
FvH4_5g29440	FvH4_6g29470	FvH4_5g24760
FvH4_3g23590	FvH4_3g08370	FvH4_1g30000
FvH4_4g18360	FvH4_2g12870	FvH4_7g29760
FvH4_7g31550	FvH4_2g40020	FvH4_2g08370
FvH4_5g36090	FvH4_4g31470	FvH4_4g31680
FvH4_3g30220	FvH4_5g00250	FvH4_6g21890
FvH4_3g38460	FvH4_6g16040	FvH4_7g33880
FvH4_5g39040	FvH4_2g23360	FvH4_5g31410
FvH4_1g13490	FvH4_2g11940	FvH4_2g03550
FvH4_1g24280	FvH4_4g32580	FvH4_2g06620
FvH4_6g32330	FvH4_2g41220	FvH4_4g06500
FvH4_5g31960		FvH4_4g04630
FvH4_5g35650		FvH4_4g18730
FvH4_2g23920		FvH4_3g41730
FvH4_7g30160		FvH4_2g03530
FvH4_5g16840		FvH4_4g23230
FvH4_1g02020		FvH4_5g19400
FvH4_3g36980		FvH4_4g09270
FvH4_3g13430		FvH4_5g23660
FvH4_1g06500		FvH4_3g26190
FvH4_3g36610		FvH4_7g00770
FvH4_6g22800		FvH4_7g22970
FvH4_4g20460		FvH4_2g32510
FvH4_6g42290		FvH4_2g29570
FvH4_7g18280		FvH4_5g10090
FvH4_6g16260		FvH4_6g12270
FvH4_2g32550		FvH4_1g22410
FvH4_5g09310		FvH4_6g34500
FvH4_7g12680		FvH4_5g27140
FvH4_3g16610		FvH4_5g18930
FvH4_4g20050		FvH4_1g08360
FvH4_4g24200		FvH4_6g28850
FvH4_6g41560		FvH4_6g01910
FvH4_5g25770		FvH4_5g26740
FvH4_5g39720		FvH4_3g37800
FvH4_6g43320		FvH4_6g24950
FvH4_3g41390		FvH4_4g35480
FvH4_4g23510		FvH4_3g01710
FvH4_7g05580		FvH4_2g29400
FvH4_6g17590		FvH4_2g33210
FvH4_1g27680		FvH4_6g32820
FvH4_6g45610		FvH4_4g14220
FvH4_4g19800		FvH4_2g12190
FvH4_6g12940		FvH4_7g08150
FvH4_6g38890		FvH4_6g49780
FvH4_4g14490		FvH4_3g36180
FvH4_6g54280		FvH4_6g41180
FvH4_4g22690		FvH4_1g06270
FvH4_7g28720		FvH4_7g18410
FvH4_5g30850		FvH4_2g14160
FvH4_1g10130		FvH4_4g01120
FvH4_4g10550		FvH4_6g32870
FvH4_2g33370		FvH4_3g05080
FvH4_4g18570		FvH4_5g23940
FvH4_2g16650		FvH4_5g25850
FvH4_6g42580		FvH4_6g33670
FvH4_4g00600		FvH4_4g23170
FvH4_6g41660		FvH4_7g29010
FvH4_4g05940		FvH4_6g45790
FvH4_2g27040		FvH4_5g20470
FvH4_5g21070		FvH4_4g26690
FvH4_3g14380		FvH4_2g29660
FvH4_7g16580		FvH4_6g04680
FvH4_6g14280		FvH4_3g28770
FvH4_6g21670		FvH4_5g11510
FvH4_3g21080		FvH4_5g35500
FvH4_3g10760		FvH4_1g12370
FvH4_5g15870		FvH4_4g30640
FvH4_7g20190		FvH4_6g32280
FvH4_6g50490		FvH4_7g10360
FvH4_3g31300		FvH4_5g37470
FvH4_1g13790		FvH4_5g08490
FvH4_3g35370		FvH4_6g29540
FvH4_6g25410
FvH4_4g05770
FvH4_3g33130
FvH4_6g33260
FvH4_5g24960
FvH4_3g42380
FvH4_5g30860
FvH4_2g05500
FvH4_5g06090
FvH4_1g06530
FvH4_6g51100
FvH4_2g10000
FvH4_3g19330
FvH4_6g03120
FvH4_6g20530
FvH4_1g21100
FvH4_6g27020
FvH4_4g26770
FvH4_6g23170
FvH4_5g20990
FvH4_7g02160
FvH4_3g15950
FvH4_7g06050
FvH4_3g15650
FvH4_2g11340
FvH4_4g06840
FvH4_4g18780
FvH4_2g31230
FvH4_1g20360
FvH4_6g03570
FvH4_3g17840
FvH4_3g45760
FvH4_5g24950
FvH4_1g04980
FvH4_1g26220
FvH4_4g06020
FvH4_4g35610
FvH4_5g09980
FvH4_4g06270
FvH4_7g03110
FvH4_4g08360
FvH4_3g08810
FvH4_2g38020
FvH4_3g43110
FvH4_6g51390
FvH4_1g03180
FvH4_4g21200
FvH4_5g30080
FvH4_1g08560
FvH4_3g30980
FvH4_3g20230
FvH4_1g08580
FvH4_3g38580
FvH4_3g37220
FvH4_3g05190
FvH4_2g24920
FvH4_1g14060
FvH4_2g07890
FvH4_5g21450
FvH4_4g35210
FvH4_5g08360
FvH4_1g03340
FvH4_1g16060
FvH4_7g25430
FvH4_6g34170
FvH4_7g05130
FvH4_5g36450
FvH4_2g02370
FvH4_3g22550
FvH4_5g05490
FvH4_6g35090
FvH4_7g08090
FvH4_5g35820
FvH4_6g31060
FvH4_2g10630
FvH4_4g03880
FvH4_3g33160
FvH4_4g10940
