# Supplementary material for: Transcriptional profiling of defense responses to Botrytis cinerea infection in leaves of Fragaria vesca plants soil-drenched with β-aminobutyric acid
Source: Front Plant Sci. 2022 Dec 8;13:1025422. doi: 10.3389/fpls.2022.1025422 (PMC9772985; doi:10.3389/fpls.2022.1025422)
Supplement: Supplementary file 5 [file Table_4.xlsx]

## Sheet: NBIvsNBNI_down_BP_GO_enrich
Supplementary table S4 (1). Gene Onthology (GO) terms in the biological process (BP) category that are enriched with
differentially expressed and downregulated genes in Fragaria vesca plants infected with Botrytis cinerea versus non-infected plants.
Treatments: NBI = No-BABA and Infected; NBNI = No-BABA and Non-Infected. BABA: β-aminobutyric acid.
GOCCID	P-value	OddsRatio	ExpCount	Count	Size	GOTerm
GO:0051510	0.00491599	Inf	0.510512	3	3	regulation of unidimensional cell growth
GO:0051513	0.00491599	Inf	0.510512	3	3	regulation of monopolar cell growth
GO:0032506	0.00491599	Inf	0.510512	3	3	cytokinetic process
GO:0042814	0.00491599	Inf	0.510512	3	3	monopolar cell growth
GO:0090529	0.00491599	Inf	0.510512	3	3	cell septum assembly
GO:0009826	0.00491599	Inf	0.510512	3	3	unidimensional cell growth
GO:0032954	0.00491599	Inf	0.510512	3	3	regulation of cytokinetic process
GO:0032955	0.00491599	Inf	0.510512	3	3	regulation of division septum assembly
GO:0060560	0.00491599	Inf	0.510512	3	3	developmental growth involved in morphogenesis
GO:0000917	0.00491599	Inf	0.510512	3	3	division septum assembly
GO:0001558	0.00491599	Inf	0.510512	3	3	regulation of cell growth
GO:1901891	0.00491599	Inf	0.510512	3	3	regulation of cell septum assembly
GO:0050482	0.0289349	Inf	0.340342	2	2	arachidonic acid secretion
GO:0015908	0.0289349	Inf	0.340342	2	2	fatty acid transport
GO:0015909	0.0289349	Inf	0.340342	2	2	long-chain fatty acid transport
GO:0051667	0.0289349	Inf	0.340342	2	2	establishment of plastid localization
GO:0051644	0.0289349	Inf	0.340342	2	2	plastid localization
GO:0009902	0.0289349	Inf	0.340342	2	2	chloroplast relocation
GO:0071715	0.0289349	Inf	0.340342	2	2	icosanoid transport
GO:0010207	0.0289349	Inf	0.340342	2	2	photosystem II assembly
GO:0009233	0.0289349	Inf	0.340342	2	2	menaquinone metabolic process
GO:0009234	0.0289349	Inf	0.340342	2	2	menaquinone biosynthetic process
GO:0015801	0.0289349	Inf	0.340342	2	2	aromatic amino acid transport
GO:1903963	0.0289349	Inf	0.340342	2	2	arachidonate transport
GO:0032309	0.0289349	Inf	0.340342	2	2	icosanoid secretion
GO:0019750	0.0289349	Inf	0.340342	2	2	chloroplast localization
GO:0009765	3.15174e-13	47.1731	3.57359	19	21	photosynthesis, light harvesting
GO:0015979	6.91728e-29	21.7462	10.7208	51	63	photosynthesis
GO:0019684	5.79704e-14	19.9447	5.10512	24	30	photosynthesis, light reaction
GO:0015995	0.000491203	14.7087	1.36137	6	8	chlorophyll biosynthetic process
GO:0006546	0.0171603	14.6689	0.680683	3	4	glycine catabolic process
GO:0015969	0.0171603	14.6689	0.680683	3	4	guanosine tetraphosphate metabolic process
GO:0022603	0.0171603	14.6689	0.680683	3	4	regulation of anatomical structure morphogenesis
GO:0022604	0.0171603	14.6689	0.680683	3	4	regulation of cell morphogenesis
GO:0048589	0.0171603	14.6689	0.680683	3	4	developmental growth
GO:0048638	0.0171603	14.6689	0.680683	3	4	regulation of developmental growth
GO:0040008	0.0171603	14.6689	0.680683	3	4	regulation of growth
GO:0034035	0.0171603	14.6689	0.680683	3	4	purine ribonucleoside bisphosphate metabolic process
GO:0009071	0.0171603	14.6689	0.680683	3	4	serine family amino acid catabolic process
GO:0015994	6.96765e-05	13.0973	1.87188	8	11	chlorophyll metabolic process
GO:0009733	1.70354e-11	10.8681	5.95598	24	35	response to auxin
GO:0009415	0.00503189	8.16198	1.36137	5	8	response to water
GO:0001101	0.00503189	8.16198	1.36137	5	8	response to acid chemical
GO:0010411	0.000393436	7.85525	2.21222	8	13	xyloglucan metabolic process
GO:0071900	0.037491	7.33301	0.850854	3	5	regulation of protein serine/threonine kinase activity
GO:1904029	0.037491	7.33301	0.850854	3	5	regulation of cyclin-dependent protein kinase activity
GO:0042126	0.037491	7.33301	0.850854	3	5	nitrate metabolic process
GO:0042128	0.037491	7.33301	0.850854	3	5	nitrate assimilation
GO:0000079	0.037491	7.33301	0.850854	3	5	regulation of cyclin-dependent protein serine/threonine kinase activity
GO:2001057	0.037491	7.33301	0.850854	3	5	reactive nitrogen species metabolic process
GO:0042822	0.037491	7.33301	0.850854	3	5	pyridoxal phosphate metabolic process
GO:0042823	0.037491	7.33301	0.850854	3	5	pyridoxal phosphate biosynthetic process
GO:0046184	0.037491	7.33301	0.850854	3	5	aldehyde biosynthetic process
GO:0000902	0.037491	7.33301	0.850854	3	5	cell morphogenesis
GO:0009653	0.0189163	6.52326	1.1912	4	7	anatomical structure morphogenesis
GO:0010383	0.00142643	5.60867	2.55256	8	15	cell wall polysaccharide metabolic process
GO:0010410	0.00142643	5.60867	2.55256	8	15	hemicellulose metabolic process
GO:0006112	0.0328007	4.89147	1.36137	4	8	energy reserve metabolic process
GO:0005977	0.0328007	4.89147	1.36137	4	8	glycogen metabolic process
GO:0005978	0.0328007	4.89147	1.36137	4	8	glycogen biosynthetic process
GO:0010035	0.0073546	4.28912	2.55256	7	15	response to inorganic substance
GO:0006721	0.0139105	4.19834	2.21222	6	13	terpenoid metabolic process
GO:0016114	0.0139105	4.19834	2.21222	6	13	terpenoid biosynthetic process
GO:0051128	0.00175131	4.09357	3.74376	10	22	regulation of cellular component organization
GO:1901617	0.00600902	3.92374	3.06307	8	18	organic hydroxy compound biosynthetic process
GO:0009725	2.47847e-07	3.90335	11.2313	29	66	response to hormone
GO:0009719	2.47847e-07	3.90335	11.2313	29	66	response to endogenous stimulus
GO:0006928	4.88464e-05	3.86615	6.977	18	41	movement of cell or subcellular component
GO:0007018	4.88464e-05	3.86615	6.977	18	41	microtubule-based movement
GO:0051726	0.00263208	3.77793	3.91393	10	23	regulation of cell cycle
GO:0000160	0.000641449	3.76373	5.10512	13	30	phosphorelay signal transduction system
GO:0009664	0.0209023	3.67282	2.38239	6	14	plant-type cell wall organization
GO:0045229	0.000934886	3.55393	5.2753	13	31	external encapsulating structure organization
GO:0071555	0.000934886	3.55393	5.2753	13	31	cell wall organization
GO:0046165	0.0392631	3.49522	2.04205	5	12	alcohol biosynthetic process
GO:0042545	0.0162731	3.42993	2.8929	7	17	cell wall modification
GO:0042221	1.48035e-07	3.42863	14.6347	35	86	response to chemical
GO:0010033	2.23277e-06	3.35468	12.2523	29	72	response to organic substance
GO:0006778	0.00543236	3.2729	4.25427	10	25	porphyrin-containing compound metabolic process
GO:0042546	0.0126008	3.26848	3.40342	8	20	cell wall biogenesis
GO:0006779	0.0126008	3.26848	3.40342	8	20	porphyrin-containing compound biosynthetic process
GO:0010564	0.0299341	3.26408	2.55256	6	15	regulation of cell cycle process
GO:0071554	3.64586e-05	3.12919	10.5506	24	62	cell wall organization or biogenesis
GO:0006662	0.0228047	3.1175	3.06307	7	18	glycerol ether metabolic process
GO:0018904	0.0228047	3.1175	3.06307	7	18	ether metabolic process
GO:0033013	0.00255286	3.04441	5.78581	13	34	tetrapyrrole metabolic process
GO:0033014	0.00578772	3.0013	4.93495	11	29	tetrapyrrole biosynthetic process
GO:0044036	0.0101425	2.88671	4.59461	10	27	cell wall macromolecule metabolic process
GO:0042440	0.0134268	2.7258	4.76478	10	28	pigment metabolic process
GO:0007017	5.56027e-05	2.66545	14.1242	29	83	microtubule-based process
GO:0006869	0.040817	2.63684	3.40342	7	20	lipid transport
GO:0046148	0.0306081	2.61323	3.91393	8	23	pigment biosynthetic process
GO:0006633	0.0132401	2.57101	5.44547	11	32	fatty acid biosynthetic process
GO:0019318	0.0132401	2.57101	5.44547	11	32	hexose metabolic process
GO:0072330	0.0128293	2.45508	6.12615	12	36	monocarboxylic acid biosynthetic process
GO:0005996	0.0263465	2.24829	5.95598	11	35	monosaccharide metabolic process
GO:0006073	0.00606556	2.21552	9.86991	18	58	cellular glucan metabolic process
GO:0044042	0.00606556	2.21552	9.86991	18	58	glucan metabolic process
GO:0006631	0.0245804	2.18099	6.63666	12	39	fatty acid metabolic process
GO:0005976	0.00409797	2.1569	11.7418	21	69	polysaccharide metabolic process
GO:0005975	3.7775e-10	2.13612	67.0473	115	394	carbohydrate metabolic process
GO:0044264	0.00890597	2.10918	10.2102	18	60	cellular polysaccharide metabolic process
GO:0032502	0.0115472	2.09038	9.69974	17	57	developmental process
GO:0048856	0.021094	2.08344	7.99803	14	47	anatomical structure development
GO:0044262	0.00632274	1.88678	15.9961	26	94	cellular carbohydrate metabolic process
GO:0006091	0.00229098	1.87079	21.1012	34	124	generation of precursor metabolites and energy
GO:0016051	0.0279346	1.80534	11.4014	18	67	carbohydrate biosynthetic process
GO:0006629	0.00567502	1.48133	47.4777	64	279	lipid metabolic process
GO:0008610	0.0480873	1.44537	23.9941	32	141	lipid biosynthetic process

## Sheet: NBIvsNBNI_up_BP_GO_enrich
Supplementary table S4 (2). Gene Onthology (GO) terms in the biological process (BP) category that are enriched with
differentially expressed and upregulated genes in Fragaria vesca plants infected with Botrytis cinerea versus non-infected plants.
Treatments: NBI = No-BABA and Infected; NBNI = No-BABA and Non-Infected. BABA: β-aminobutyric acid.
GOCCID	P-value	OddsRatio	ExpCount	Count	Size	GOTerm
GO:0042273	0.00593382	Inf	0.543528	3	3	ribosomal large subunit biogenesis
GO:0006549	0.0328004	Inf	0.362352	2	2	isoleucine metabolic process
GO:0046514	0.0328004	Inf	0.362352	2	2	ceramide catabolic process
GO:0006680	0.0328004	Inf	0.362352	2	2	glucosylceramide catabolic process
GO:0006687	0.0328004	Inf	0.362352	2	2	glycosphingolipid metabolic process
GO:0006677	0.0328004	Inf	0.362352	2	2	glycosylceramide metabolic process
GO:0006678	0.0328004	Inf	0.362352	2	2	glucosylceramide metabolic process
GO:0015940	0.0328004	Inf	0.362352	2	2	pantothenate biosynthetic process
GO:0015939	0.0328004	Inf	0.362352	2	2	pantothenate metabolic process
GO:0042274	0.0328004	Inf	0.362352	2	2	ribosomal small subunit biogenesis
GO:0046466	0.0328004	Inf	0.362352	2	2	membrane lipid catabolic process
GO:0019377	0.0328004	Inf	0.362352	2	2	glycolipid catabolic process
GO:0046477	0.0328004	Inf	0.362352	2	2	glycosylceramide catabolic process
GO:0046479	0.0328004	Inf	0.362352	2	2	glycosphingolipid catabolic process
GO:0030149	0.0328004	Inf	0.362352	2	2	sphingolipid catabolic process
GO:0009097	0.0328004	Inf	0.362352	2	2	isoleucine biosynthetic process
GO:0006084	0.0045883	18.1401	0.90588	4	5	acetyl-CoA metabolic process
GO:0006637	0.0045883	18.1401	0.90588	4	5	acyl-CoA metabolic process
GO:0035383	0.0045883	18.1401	0.90588	4	5	thioester metabolic process
GO:0009611	0.0045883	18.1401	0.90588	4	5	response to wounding
GO:0006085	0.0205173	13.5927	0.724704	3	4	acetyl-CoA biosynthetic process
GO:0035384	0.0205173	13.5927	0.724704	3	4	thioester biosynthetic process
GO:0071616	0.0205173	13.5927	0.724704	3	4	acyl-CoA biosynthetic process
GO:0006002	0.00293956	11.3456	1.26823	5	7	fructose 6-phosphate metabolic process
GO:0034030	0.0117895	9.06824	1.08706	4	6	ribonucleoside bisphosphate biosynthetic process
GO:0034033	0.0117895	9.06824	1.08706	4	6	purine nucleoside bisphosphate biosynthetic process
GO:0033866	0.0117895	9.06824	1.08706	4	6	nucleoside bisphosphate biosynthetic process
GO:0006026	0.00105124	7.95324	1.99294	7	11	aminoglycan catabolic process
GO:0006040	0.00105124	7.95324	1.99294	7	11	amino sugar metabolic process
GO:0006030	0.00105124	7.95324	1.99294	7	11	chitin metabolic process
GO:0006032	0.00105124	7.95324	1.99294	7	11	chitin catabolic process
GO:1901071	0.00105124	7.95324	1.99294	7	11	glucosamine-containing compound metabolic process
GO:1901072	0.00105124	7.95324	1.99294	7	11	glucosamine-containing compound catabolic process
GO:0046348	0.00105124	7.95324	1.99294	7	11	amino sugar catabolic process
GO:0016998	0.00105124	7.95324	1.99294	7	11	cell wall macromolecule catabolic process
GO:0006022	0.00212983	6.36131	2.17411	7	12	aminoglycan metabolic process
GO:0034032	0.00122364	5.11803	3.07999	9	17	purine nucleoside bisphosphate metabolic process
GO:0033865	0.00122364	5.11803	3.07999	9	17	nucleoside bisphosphate metabolic process
GO:0033875	0.00122364	5.11803	3.07999	9	17	ribonucleoside bisphosphate metabolic process
GO:0009607	8.6107e-07	5.07277	7.24704	21	40	response to biotic stimulus
GO:1901136	0.000690486	5.05845	3.44235	10	19	carbohydrate derivative catabolic process
GO:0070588	0.0119227	4.53874	2.17411	6	12	calcium ion transmembrane transport
GO:0015936	0.0405071	4.5323	1.44941	4	8	coenzyme A metabolic process
GO:0042254	5.64806e-07	4.01001	10.5082	27	58	ribosome biogenesis
GO:0042908	0.000266606	3.80438	5.97881	15	33	xenobiotic transport
GO:0006855	0.000266606	3.80438	5.97881	15	33	xenobiotic transmembrane transport
GO:0006270	0.034126	3.77884	1.99294	5	11	DNA replication initiation
GO:0006261	0.0088763	3.6347	3.26117	8	18	DNA-templated DNA replication
GO:0006090	0.000167194	3.42926	7.6094	18	42	pyruvate metabolic process
GO:0022613	3.5082e-06	3.39084	11.9576	28	66	ribonucleoprotein complex biogenesis
GO:0006952	8.44565e-06	3.2667	11.7764	27	65	defense response
GO:0006096	0.000832225	3.25893	6.52234	15	36	glycolytic process
GO:0046031	0.000832225	3.25893	6.52234	15	36	ADP metabolic process
GO:0009185	0.000832225	3.25893	6.52234	15	36	ribonucleoside diphosphate metabolic process
GO:0009179	0.000832225	3.25893	6.52234	15	36	purine ribonucleoside diphosphate metabolic process
GO:0009135	0.000832225	3.25893	6.52234	15	36	purine nucleoside diphosphate metabolic process
GO:0006757	0.000832225	3.25893	6.52234	15	36	ATP generation from ADP
GO:0042430	0.0499855	3.23836	2.17411	5	12	indole-containing compound metabolic process
GO:0006568	0.0499855	3.23836	2.17411	5	12	tryptophan metabolic process
GO:0006586	0.0499855	3.23836	2.17411	5	12	indolalkylamine metabolic process
GO:0006979	0.000337695	3.1642	7.97175	18	44	response to oxidative stress
GO:0044036	0.00501595	3.12838	4.89175	11	27	cell wall macromolecule metabolic process
GO:0009072	0.00241118	3.11724	5.79763	13	32	aromatic amino acid family metabolic process
GO:0046939	0.000959842	3.04262	7.24704	16	40	nucleotide phosphorylation
GO:0006165	0.000959842	3.04262	7.24704	16	40	nucleoside diphosphate phosphorylation
GO:0043648	0.0182155	3.0277	3.62352	8	20	dicarboxylic acid metabolic process
GO:0009081	0.0396342	3.024	2.71764	6	15	branched-chain amino acid metabolic process
GO:0009132	0.00131372	2.92033	7.42822	16	41	nucleoside diphosphate metabolic process
GO:0009150	1.98111e-05	2.72836	15.5811	32	86	purine ribonucleotide metabolic process
GO:0006163	1.70019e-05	2.65548	16.8494	34	93	purine nucleotide metabolic process
GO:0048544	0.00039525	2.63275	11.4141	23	63	recognition of pollen
GO:0008037	0.00039525	2.63275	11.4141	23	63	cell recognition
GO:0009856	0.00039525	2.63275	11.4141	23	63	pollination
GO:0009875	0.00039525	2.63275	11.4141	23	63	pollen-pistil interaction
GO:0044706	0.00039525	2.63275	11.4141	23	63	multi-multicellular organism process
GO:0019693	3.38926e-05	2.62985	15.9435	32	88	ribose phosphate metabolic process
GO:0009259	3.38926e-05	2.62985	15.9435	32	88	ribonucleotide metabolic process
GO:0072521	1.49321e-05	2.54776	18.8423	37	104	purine-containing compound metabolic process
GO:0016052	0.00256038	2.48948	9.23998	18	51	carbohydrate catabolic process
GO:0016072	0.0163977	2.37293	6.34116	12	35	rRNA metabolic process
GO:0009308	0.0333022	2.27127	5.43528	10	30	amine metabolic process
GO:0006575	0.0424906	2.27011	4.89175	9	27	cellular modified amino acid metabolic process
GO:0043603	1.55908e-10	2.17408	67.941	117	375	cellular amide metabolic process
GO:0006364	0.0325753	2.1732	6.15999	11	34	rRNA processing
GO:0044282	0.0414436	2.16268	5.61646	10	31	small molecule catabolic process
GO:0043604	7.62331e-10	2.1524	64.1363	110	354	amide biosynthetic process
GO:0009117	0.000386868	2.09526	20.8352	36	115	nucleotide metabolic process
GO:0072522	0.0120801	2.09338	9.78351	17	54	purine-containing compound biosynthetic process
GO:0006720	0.03999	2.08223	6.34116	11	35	isoprenoid metabolic process
GO:0008299	0.03999	2.08223	6.34116	11	35	isoprenoid biosynthetic process
GO:0006412	8.58468e-09	2.0764	61.9622	104	342	translation
GO:0043043	9.739e-09	2.06204	62.8681	105	347	peptide biosynthetic process
GO:0022414	0.00460243	2.06031	13.407	23	74	reproductive process
GO:0006518	5.6739e-09	2.05957	65.4046	109	361	peptide metabolic process
GO:0006164	0.0240304	2.05444	8.15292	14	45	purine nucleotide biosynthetic process
GO:0098660	0.0240304	2.05444	8.15292	14	45	inorganic ion transmembrane transport
GO:0098662	0.0240304	2.05444	8.15292	14	45	inorganic cation transmembrane transport
GO:0098655	0.0240304	2.05444	8.15292	14	45	cation transmembrane transport
GO:0009152	0.0382993	2.01976	7.06587	12	39	purine ribonucleotide biosynthetic process
GO:0006753	0.000666224	2.01737	21.3788	36	118	nucleoside phosphate metabolic process
GO:0071554	0.0112059	2.01446	11.2329	19	62	cell wall organization or biogenesis
GO:0046034	0.0107309	1.98282	11.9576	20	66	ATP metabolic process
GO:0000003	0.00660483	1.98176	13.7694	23	76	reproduction
GO:0055086	0.000774218	1.86719	26.9952	43	149	nucleobase-containing small molecule metabolic process
GO:0034220	0.0385761	1.8437	9.42116	15	52	ion transmembrane transport
GO:1901135	0.000466208	1.69306	43.3011	64	239	carbohydrate derivative metabolic process
GO:0034645	3.11864e-05	1.59662	85.1528	119	470	cellular macromolecule biosynthetic process
GO:1901566	5.2832e-06	1.55197	123.381	167	681	organonitrogen compound biosynthetic process
GO:0016310	6.32389e-06	1.49606	151.101	198	834	phosphorylation
GO:0006950	0.00592919	1.45921	51.9975	69	287	response to stress
GO:0006468	4.15608e-05	1.45523	140.955	182	778	protein phosphorylation
GO:1901564	8.6463e-07	1.3879	402.754	473	2223	organonitrogen compound metabolic process
GO:0019637	0.0318547	1.3762	40.7646	52	225	organophosphate metabolic process
GO:0006796	0.000205961	1.34714	198.025	240	1093	phosphate-containing compound metabolic process
GO:0006793	0.00021904	1.34523	198.207	240	1094	phosphorus metabolic process
GO:0044267	0.000156221	1.31181	278.83	327	1539	cellular protein metabolic process
GO:0006082	0.0331486	1.30617	58.8822	72	325	organic acid metabolic process
GO:0019752	0.0425638	1.28887	57.7952	70	319	carboxylic acid metabolic process
GO:0043436	0.0424432	1.28678	58.7011	71	324	oxoacid metabolic process
GO:0055085	0.0199506	1.28472	85.6963	103	473	transmembrane transport
GO:0044260	0.0055211	1.20291	327.385	363	1807	cellular macromolecule metabolic process
GO:0019538	0.00974865	1.18523	329.197	362	1817	protein metabolic process
GO:0008152	0.0231829	1.16862	810.219	837	4472	metabolic process

## Sheet: NBIvsNBNI_up_CC_GO_enrich
Supplementary table S4 (3). Gene Onthology (GO) terms in the cellular component (CC) category that are enriched with
differentially expressed and upregulated genes in Fragaria vesca plants infected with Botrytis cinerea versus non-infected plants.
Treatments: NBI = No-BABA and Infected; NBNI = No-BABA and Non-Infected. BABA: β-aminobutyric acid.
GOCCID	P-value	OddsRatio	ExpCount	Count	Size	GOTerm
GO:0031012	0.0032119	20.362	0.826845	4	5	extracellular matrix
GO:0042555	0.0170134	6.7813	1.15758	4	7	MCM complex
GO:0005730	0.00222671	5.96621	2.1498	7	13	nucleolus
GO:0005840	1.91687e-19	4.04976	37.208	91	225	ribosome
GO:0015935	0.0073105	3.71939	3.14201	8	19	small ribosomal subunit
GO:0044391	0.000438012	3.31312	6.78013	16	41	ribosomal subunit
GO:0030312	0.00192271	3.00714	6.28402	14	38	external encapsulating structure
GO:0015934	0.0196007	2.91846	3.63812	8	22	large ribosomal subunit
GO:0048046	0.00804073	2.8208	5.12644	11	31	apoplast
GO:0110165	0.0156459	2.45791	432.936	440	2618	cellular anatomical entity
GO:0005618	0.0352009	2.22178	5.45717	10	33	cell wall
GO:0005576	0.00909839	2.10949	10.2529	18	62	extracellular region
GO:0043228	1.7866e-08	2.09876	64.99	105	393	non-membrane-bounded organelle
GO:0043232	1.7866e-08	2.09876	64.99	105	393	intracellular non-membrane-bounded organelle
GO:0071944	0.0256364	1.69412	15.3793	23	93	cell periphery
GO:1990904	0.0459563	1.61068	14.5525	21	88	ribonucleoprotein complex

## Sheet: NBI vs NBNI_down_CC_GO_enrich
Supplementary table S4 (4). Gene Onthology (GO) terms in the cellular component (CC) category that are enriched with
differentially expressed and downregulated genes in Fragaria vesca plants infected with Botrytis cinerea versus non-infected plants.
Treatments: NBI = No-BABA and Infected; NBNI = No-BABA and Non-Infected. BABA: β-aminobutyric acid.
GOCCID	P-value	OddsRatio	ExpCount	Count	Size	GOTerm
GO:0009538	9.52568e-05	Inf	0.787912	5	5	photosystem I reaction center
GO:0009512	0.00388987	Inf	0.472747	3	3	cytochrome b6f complex
GO:0009522	1.59953e-05	38.0311	1.26066	7	8	photosystem I
GO:0009523	2.20145e-12	33.4496	3.30923	18	21	photosystem II
GO:0009521	3.08885e-16	28.3375	4.72747	25	30	photosystem
GO:0009654	3.81276e-10	27.6707	2.83648	15	18	photosystem II oxygen evolving complex
GO:0009579	7.09554e-21	27.2394	6.3033	33	40	thylakoid
GO:0034357	4.6015e-17	25.6206	5.20022	27	33	photosynthetic membrane
GO:0042651	5.5751e-11	23.625	3.30923	17	21	thylakoid membrane
GO:0005887	0.00266561	21.5772	0.787912	4	5	integral component of plasma membrane
GO:0019898	1.25609e-07	14.3063	2.83648	13	18	extrinsic component of membrane
GO:1990204	1.41535e-07	7.13303	5.04264	18	32	oxidoreductase complex
GO:0009536	5.18721e-05	5.97227	3.6244	12	23	plastid
GO:0009507	5.18721e-05	5.97227	3.6244	12	23	chloroplast
GO:0031226	0.025119	5.38717	1.26066	4	8	intrinsic component of plasma membrane
GO:0005576	2.78827e-08	4.64247	9.77011	28	62	extracellular region
GO:0005618	4.80699e-05	4.5813	5.20022	15	33	cell wall
GO:0005874	0.00720004	4.21079	2.52132	7	16	microtubule
GO:0099081	0.00720004	4.21079	2.52132	7	16	supramolecular polymer
GO:0099512	0.00720004	4.21079	2.52132	7	16	supramolecular fiber
GO:0099513	0.00720004	4.21079	2.52132	7	16	polymeric cytoskeletal fiber
GO:0110165	0.00292514	3.59297	412.551	421	2618	cellular anatomical entity
GO:0030312	0.00033335	3.57741	5.98813	15	38	external encapsulating structure
GO:0099080	0.0150646	3.44215	2.83648	7	18	supramolecular complex
GO:0048046	0.00553215	2.99179	4.88506	11	31	apoplast
GO:0015630	0.0108593	2.50996	5.98813	12	38	microtubule cytoskeleton
GO:0071944	0.0498701	1.58828	14.6552	21	93	cell periphery
GO:0016020	0.000118379	1.48427	197.766	233	1255	membrane

## Sheet: NBI vs NBNI_down_MF_GO_enrich
Supplementary table S4 (5). Gene Onthology (GO) terms in the molecular function (MF) category that are enriched with
differentially expressed and downregulated genes in Fragaria vesca plants infected with Botrytis cinerea versus non-infected plants.
Treatments: NBI = No-BABA and Infected; NBNI = No-BABA and Non-Infected. BABA: β-aminobutyric acid.
GOMFID	Pvalue	OddsRatio	ExpCount	Count	Size	GOTerm
GO:0004373	1.51735e-05	Inf	0.945397	6	6	glycogen (starch) synthase activity
GO:0042132	0.00390527	Inf	0.472698	3	3	fructose 1,6-bisphosphate 1-phosphatase activity
GO:0004853	0.024813	Inf	0.315132	2	2	uroporphyrinogen decarboxylase activity
GO:0015173	0.024813	Inf	0.315132	2	2	aromatic amino acid transmembrane transporter activity
GO:0008253	0.024813	Inf	0.315132	2	2	5'-nucleotidase activity
GO:0004623	0.024813	Inf	0.315132	2	2	phospholipase A2 activity
GO:0004612	0.024813	Inf	0.315132	2	2	phosphoenolpyruvate carboxykinase (ATP) activity
GO:0047216	0.024813	Inf	0.315132	2	2	inositol 3-alpha-galactosyltransferase activity
GO:0008839	0.024813	Inf	0.315132	2	2	4-hydroxy-tetrahydrodipicolinate reductase
GO:0080019	0.024813	Inf	0.315132	2	2	fatty-acyl-CoA reductase (alcohol-forming) activity
GO:0035250	0.024813	Inf	0.315132	2	2	UDP-galactosyltransferase activity
GO:0005544	6.38613e-05	18.7966	1.4181	7	9	calcium-dependent phospholipid binding
GO:0008184	0.0137782	16.07	0.630265	3	4	glycogen phosphorylase activity
GO:0043733	0.0137782	16.07	0.630265	3	4	DNA-3-methylbase glycosylase activity
GO:0008725	0.0137782	16.07	0.630265	3	4	DNA-3-methyladenine glycosylase activity
GO:0016987	0.00153269	13.408	1.10296	5	7	sigma factor activity
GO:2001070	0.00704839	10.7192	0.945397	4	6	starch binding
GO:0050308	0.0304177	8.03398	0.787831	3	5	sugar-phosphatase activity
GO:0003905	0.0304177	8.03398	0.787831	3	5	alkylbase DNA N-glycosylase activity
GO:0015368	0.0304177	8.03398	0.787831	3	5	calcium:cation antiporter activity
GO:0015369	0.0304177	8.03398	0.787831	3	5	calcium:proton antiporter activity
GO:0019900	0.0304177	8.03398	0.787831	3	5	kinase binding
GO:0019901	0.0304177	8.03398	0.787831	3	5	protein kinase binding
GO:0004645	0.0144027	7.14523	1.10296	4	7	1,4-alpha-oligoglucan phosphorylase activity
GO:0016762	0.00475755	4.6956	2.36349	7	15	xyloglucan:xyloglucosyl transferase activity
GO:0016717	0.039873	4.28606	1.4181	4	9	oxidoreductase activity, acting on paired donors, with oxidation of a pair of donors resulting in the reduction of molecular oxygen to two molecules of water
GO:0003777	1.71244e-05	4.22321	6.46021	18	41	microtubule motor activity
GO:0004650	0.0145443	4.02208	2.20593	6	14	polygalacturonase activity
GO:0003774	1.04257e-05	4.00071	7.40561	20	47	cytoskeletal motor activity
GO:0005200	0.0290423	3.82846	1.89079	5	12	structural constituent of cytoskeleton
GO:0008017	1.16872e-05	3.78181	8.03587	21	51	microtubule binding
GO:0030599	0.0107791	3.75553	2.67862	7	17	pectinesterase activity
GO:0016298	0.0152832	3.41369	2.83619	7	18	lipase activity
GO:0015631	2.53679e-05	3.27115	9.61153	23	61	tubulin binding
GO:0016620	0.0209779	3.12882	2.99376	7	19	oxidoreductase activity, acting on the aldehyde or oxo group of donors, NAD or NADP as acceptor
GO:0008289	0.000148821	2.98263	9.2964	21	59	lipid binding
GO:0005507	0.00472776	2.5961	6.77534	14	43	copper ion binding
GO:0004252	0.000674385	2.57396	10.2418	21	65	serine-type endopeptidase activity
GO:0046527	0.000917595	2.56702	9.7691	20	62	glucosyltransferase activity
GO:0070001	0.00914475	2.35182	7.24804	14	46	aspartic-type peptidase activity
GO:0004190	0.00914475	2.35182	7.24804	14	46	aspartic-type endopeptidase activity
GO:0004553	2.80898e-07	2.32866	31.6708	60	201	hydrolase activity, hydrolyzing O-glycosyl compounds
GO:0052689	0.0125132	2.32843	6.77534	13	43	carboxylic ester hydrolase activity
GO:0008092	0.00116414	2.27167	12.7629	24	81	cytoskeletal protein binding
GO:0016798	2.9661e-07	2.26972	33.8767	63	215	hydrolase activity, acting on glycosyl bonds
GO:0004857	0.0120182	2.1794	8.19344	15	52	enzyme inhibitor activity
GO:0035251	0.0221251	2.11596	7.24804	13	46	UDP-glucosyltransferase activity
GO:0016765	0.0418156	1.95187	7.09048	12	45	transferase activity, transferring alkyl or aryl (other than methyl) groups
GO:0016830	0.0418156	1.95187	7.09048	12	45	carbon-carbon lyase activity
GO:0008236	0.00563115	1.81885	18.1201	29	115	serine-type peptidase activity
GO:0017171	0.00563115	1.81885	18.1201	29	115	serine hydrolase activity
GO:0022803	0.00829079	1.7758	17.805	28	113	passive transmembrane transporter activity
GO:0015267	0.00829079	1.7758	17.805	28	113	channel activity
GO:0004175	0.00192	1.73696	27.8892	43	177	endopeptidase activity
GO:0005506	0.00205914	1.69452	30.4103	46	193	iron ion binding
GO:0016788	0.000258526	1.64278	51.0514	75	324	hydrolase activity, acting on ester bonds
GO:0016705	0.00736842	1.57492	30.7254	44	195	oxidoreductase activity, acting on paired donors, with incorporation or reduction of molecular oxygen
GO:0046906	0.0094168	1.53904	31.9859	45	203	tetrapyrrole binding
GO:0016829	0.0347849	1.50929	21.5866	30	137	lyase activity
GO:0005509	0.0244509	1.509	25.2106	35	160	calcium ion binding
GO:0020037	0.0183631	1.47815	31.5132	43	200	heme binding
GO:0016491	0.000112188	1.40064	142.912	183	907	oxidoreductase activity
GO:0016787	1.79305e-05	1.38363	204.836	257	1300	hydrolase activity
GO:0003824	6.20448e-09	1.38304	739.773	841	4695	catalytic activity
GO:0016758	0.0292272	1.36228	43.0156	55	273	hexosyltransferase activity
GO:0043169	0.0414042	1.16266	176.474	197	1120	cation binding

## Sheet: NBI vs NBNI_up_MF_GO_enrich
Supplementary table S4 (6). Gene Onthology (GO) terms in the molecular function (MF) category that are enriched with
differentially expressed and upregulated genes in Fragaria vesca plants infected with Botrytis cinerea versus non-infected plants.
Treatments: NBI = No-BABA and Infected; NBNI = No-BABA and Non-Infected. BABA: β-aminobutyric acid.
GOMFID	P-value	OddsRatio	ExpCount	Count	Size	GOTerm
GO:0008097	0.0047917	Inf	0.506032	3	3	5S rRNA binding
GO:0016841	0.0047917	Inf	0.506032	3	3	ammonia-lyase activity
GO:0009916	0.0047917	Inf	0.506032	3	3	alternative oxidase activity
GO:0004362	0.0284372	Inf	0.337354	2	2	glutathione-disulfide reductase (NADPH) activity
GO:0004348	0.0284372	Inf	0.337354	2	2	glucosylceramidase activity
GO:0015038	0.0284372	Inf	0.337354	2	2	glutathione disulfide oxidoreductase activity
GO:0140677	0.0284372	Inf	0.337354	2	2	molecular function activator activity
GO:0030515	0.0284372	Inf	0.337354	2	2	snoRNA binding
GO:0004640	0.0284372	Inf	0.337354	2	2	phosphoribosylanthranilate isomerase activity
GO:0001671	0.0284372	Inf	0.337354	2	2	ATPase activator activity
GO:0018580	0.0284372	Inf	0.337354	2	2	nitronate monooxygenase activity
GO:0004019	0.0284372	Inf	0.337354	2	2	adenylosuccinate synthase activity
GO:0004867	0.000700753	24.7168	1.01206	5	6	serine-type endopeptidase inhibitor activity
GO:0008061	0.000100688	17.3214	1.5181	7	9	chitin binding
GO:0008121	0.0167458	14.8114	0.674709	3	4	ubiquinol-cytochrome-c reductase activity
GO:0047134	0.0167458	14.8114	0.674709	3	4	protein-disulfide reductase (NAD(P)) activity
GO:0004084	0.0167458	14.8114	0.674709	3	4	branched-chain-amino-acid transaminase activity
GO:0004568	0.000673046	8.65848	1.85545	7	11	chitinase activity
GO:0003872	0.00484596	8.23684	1.34942	5	8	6-phosphofructokinase activity
GO:0045735	0.000204146	7.42902	2.53016	9	15	nutrient reservoir activity
GO:0030151	0.0366272	7.40478	0.843386	3	5	molybdenum ion binding
GO:0005545	0.0366272	7.40478	0.843386	3	5	1-phosphatidylinositol binding
GO:0010333	6.11422e-05	6.8168	3.20487	11	19	terpene synthase activity
GO:0030955	0.00939642	6.17684	1.5181	5	9	potassium ion binding
GO:0031420	0.00939642	6.17684	1.5181	5	9	alkali metal ion binding
GO:0004506	0.00939642	6.17684	1.5181	5	9	squalene monooxygenase activity
GO:0008443	0.00939642	6.17684	1.5181	5	9	phosphofructokinase activity
GO:0004743	0.00939642	6.17684	1.5181	5	9	pyruvate kinase activity
GO:0030145	0.000115198	6.05861	3.37354	11	20	manganese ion binding
GO:0016838	6.22475e-05	5.95145	3.7109	12	22	carbon-oxygen lyase activity, acting on phosphates
GO:0140358	0.00837467	4.94332	2.02413	6	12	P-type transmembrane transporter activity
GO:0015662	0.00837467	4.94332	2.02413	6	12	P-type ion transporter activity
GO:0016679	4.79517e-05	4.65484	5.22899	15	31	oxidoreductase activity, acting on diphenols and related substances as donors
GO:0030247	1.98891e-06	4.54664	7.4218	21	44	polysaccharide binding
GO:0022824	0.00105588	4.50241	3.54222	10	21	transmitter-gated ion channel activity
GO:0022834	0.00105588	4.50241	3.54222	10	21	ligand-gated channel activity
GO:0022835	0.00105588	4.50241	3.54222	10	21	transmitter-gated channel activity
GO:0008066	0.00105588	4.50241	3.54222	10	21	glutamate receptor activity
GO:0015276	0.00105588	4.50241	3.54222	10	21	ligand-gated ion channel activity
GO:0005230	0.00105588	4.50241	3.54222	10	21	extracellular ligand-gated ion channel activity
GO:0030594	0.00105588	4.50241	3.54222	10	21	neurotransmitter receptor activity
GO:0004970	0.00105588	4.50241	3.54222	10	21	ionotropic glutamate receptor activity
GO:0016840	0.00702165	4.32703	2.53016	7	15	carbon-nitrogen lyase activity
GO:0061134	0.00702165	4.32703	2.53016	7	15	peptidase regulator activity
GO:0010181	0.000479142	4.24887	4.38561	12	26	FMN binding
GO:0016682	0.000479142	4.24887	4.38561	12	26	oxidoreductase activity, acting on diphenols and related substances as donors, oxygen as acceptor
GO:0005388	0.0256513	4.11684	1.85545	5	11	P-type calcium transporter activity
GO:0004888	0.00247621	3.80876	3.87958	10	23	transmembrane signaling receptor activity
GO:0004866	0.0201004	3.70655	2.36148	6	14	endopeptidase inhibitor activity
GO:0061135	0.0201004	3.70655	2.36148	6	14	endopeptidase regulator activity
GO:0030414	0.0201004	3.70655	2.36148	6	14	peptidase inhibitor activity
GO:0003735	1.81549e-17	3.48905	37.9524	91	225	structural constituent of ribosome
GO:0004601	0.000241646	3.37672	7.08444	17	42	peroxidase activity
GO:0016209	4.81072e-05	3.36987	8.77122	21	52	antioxidant activity
GO:0016684	0.000337543	3.24643	7.25312	17	43	oxidoreductase activity, acting on peroxide as acceptor
GO:0016835	7.2532e-05	3.12726	9.6146	22	57	carbon-oxygen lyase activity
GO:0052716	0.0396971	2.96448	2.69884	6	16	hydroquinone:oxygen oxidoreductase activity
GO:0050661	0.00320725	2.92801	5.9037	13	35	NADP binding
GO:0020037	1.20033e-11	2.92088	33.7354	73	200	heme binding
GO:0046906	2.72094e-11	2.85236	34.2415	73	203	tetrapyrrole binding
GO:0005198	3.35347e-13	2.7693	44.1934	92	262	structural molecule activity
GO:0016709	0.0391986	2.66109	3.37354	7	20	oxidoreductase activity, acting on paired donors, with incorporation or reduction of molecular oxygen, NAD(P)H as one donor, and incorporation of one atom of oxygen
GO:0000287	0.000480244	2.48662	12.1448	24	72	magnesium ion binding
GO:0015297	0.00180493	2.4819	9.6146	19	57	antiporter activity
GO:0015291	0.000463515	2.43848	12.8195	25	76	secondary active transmembrane transporter activity
GO:0004497	0.0050757	2.40366	8.26519	16	49	monooxygenase activity
GO:0016701	0.0151789	2.37603	6.24106	12	37	oxidoreductase activity, acting on single donors with incorporation of molecular oxygen
GO:0016829	7.91846e-06	2.36956	23.1088	44	137	lyase activity
GO:0016705	1.76271e-07	2.35	32.8921	62	195	oxidoreductase activity, acting on paired donors, with incorporation or reduction of molecular oxygen
GO:0016769	0.047367	2.32594	4.21693	8	25	transferase activity, transferring nitrogenous groups
GO:0008483	0.047367	2.32594	4.21693	8	25	transaminase activity
GO:0060089	0.0330412	2.24805	5.39767	10	32	molecular transducer activity
GO:0038023	0.0330412	2.24805	5.39767	10	32	signaling receptor activity
GO:0022836	0.0134041	2.23663	7.59048	14	45	gated channel activity
GO:0050660	0.00132099	2.21934	13.6629	25	81	flavin adenine dinucleotide binding
GO:0005506	3.37626e-06	2.15962	32.5547	58	193	iron ion binding
GO:0016491	1.29939e-20	2.15803	152.99	259	907	oxidoreductase activity
GO:0030246	0.000188767	2.14702	20.7473	37	123	carbohydrate binding
GO:0004674	0.000775276	2.13354	16.8677	30	100	protein serine/threonine kinase activity
GO:0009055	0.00278789	2.0031	15.8557	27	94	electron transfer activity
GO:0005216	0.00732365	1.88066	15.3496	25	91	ion channel activity
GO:0022804	0.000704196	1.84564	27.4944	44	163	active transmembrane transporter activity
GO:0004857	0.0453989	1.82298	8.77122	14	52	enzyme inhibitor activity
GO:0022803	0.00603778	1.79637	19.0605	30	113	passive transmembrane transporter activity
GO:0015267	0.00603778	1.79637	19.0605	30	113	channel activity
GO:0016614	0.0109206	1.73793	18.2171	28	108	oxidoreductase activity, acting on CH-OH group of donors
GO:0043565	0.0133367	1.63871	21.7594	32	129	sequence-specific DNA binding
GO:0046873	0.0458335	1.62372	13.6629	20	81	metal ion transmembrane transporter activity
GO:0003824	2.02224e-18	1.61932	791.94	950	4695	catalytic activity
GO:0016773	2.48111e-08	1.61916	146.749	207	870	phosphotransferase activity, alcohol group as acceptor
GO:0004672	4.51418e-07	1.57646	133.086	185	789	protein kinase activity
GO:0016853	0.0227843	1.54563	23.4461	33	139	isomerase activity
GO:0016301	3.23704e-07	1.54508	153.159	209	908	kinase activity
GO:0015318	0.0100832	1.50017	36.4343	50	216	inorganic molecular entity transmembrane transporter activity
GO:0016758	0.00705049	1.46632	46.0489	62	273	hexosyltransferase activity
GO:0005215	0.000848945	1.43898	85.0133	112	504	transporter activity
GO:0016772	1.52106e-05	1.41837	174.75	224	1036	transferase activity, transferring phosphorus-containing groups
GO:0022857	0.00260534	1.39505	81.4711	105	483	transmembrane transporter activity
GO:0003700	0.0459977	1.33358	40.6512	51	241	DNA-binding transcription factor activity
GO:0016740	2.58467e-05	1.31036	320.487	381	1900	transferase activity
GO:0016757	0.0301416	1.30278	60.2178	74	357	glycosyltransferase activity
GO:0036094	3.43725e-05	1.29331	354.391	416	2101	small molecule binding
GO:0043168	7.27546e-05	1.2845	335.33	393	1988	anion binding
GO:0000166	9.5417e-05	1.27807	338.198	395	2005	nucleotide binding
GO:1901265	9.5417e-05	1.27807	338.198	395	2005	nucleoside phosphate binding
GO:0005524	0.00084309	1.26679	237.16	279	1406	ATP binding
GO:0030554	0.0012859	1.23964	275.45	318	1633	adenyl nucleotide binding
GO:0097367	0.000841978	1.23884	309.691	356	1836	carbohydrate derivative binding
GO:0032559	0.00143199	1.23703	274.944	317	1630	adenyl ribonucleotide binding
GO:0032553	0.00220634	1.21574	307.161	349	1821	ribonucleotide binding
GO:0043167	0.000812886	1.20305	507.719	562	3010	ion binding
GO:0035639	0.00721485	1.1951	264.992	299	1571	purine ribonucleoside triphosphate binding
GO:0032555	0.00961368	1.17647	302.776	337	1795	purine ribonucleotide binding
GO:0017076	0.0100265	1.17496	303.956	338	1802	purine nucleotide binding
GO:0140096	0.0447295	1.1406	234.461	257	1390	catalytic activity, acting on a protein
GO:0097159	0.0439305	1.10222	617.19	648	3659	organic cyclic compound binding
GO:1901363	0.0439305	1.10222	617.19	648	3659	heterocyclic compound binding
