# Supplementary material for: Transcriptional profiling of defense responses to Botrytis cinerea infection in leaves of Fragaria vesca plants soil-drenched with β-aminobutyric acid
Source: Front Plant Sci. 2022 Dec 8;13:1025422. doi: 10.3389/fpls.2022.1025422 (PMC9772985; doi:10.3389/fpls.2022.1025422)
Supplement: Supplementary file 6 [file Table_5.xlsx]

## Sheet: BIvsBNI_down_BP_GO_enrich
Supplementary table S5 (1). Gene Onthology (GO) terms in the Biological Process (BP) category that are enriched with differentially
expressed and downregulated genes in BABA-treated Fragaria vesca plants infected with Botrytis cinerea versus BABA-treated non-infected plants.
Treatments: BI = BABA-treated and Infected; BNI = BABA-treated and Non-Infected. BABA: β-aminobutyric acid.
GOBPID	P-value	OddsRatio	ExpCount	Count	Size	GOTerm
GO:0006546	0.00110417	Inf	0.729961	4	4	glycine catabolic process
GO:0009071	0.00110417	Inf	0.729961	4	4	serine family amino acid catabolic process
GO:0051510	0.00606399	Inf	0.54747	3	3	regulation of unidimensional cell growth
GO:0051513	0.00606399	Inf	0.54747	3	3	regulation of monopolar cell growth
GO:0032506	0.00606399	Inf	0.54747	3	3	cytokinetic process
GO:0042814	0.00606399	Inf	0.54747	3	3	monopolar cell growth
GO:0090529	0.00606399	Inf	0.54747	3	3	cell septum assembly
GO:0009826	0.00606399	Inf	0.54747	3	3	unidimensional cell growth
GO:0032954	0.00606399	Inf	0.54747	3	3	regulation of cytokinetic process
GO:0032955	0.00606399	Inf	0.54747	3	3	regulation of division septum assembly
GO:0060560	0.00606399	Inf	0.54747	3	3	developmental growth involved in morphogenesis
GO:0000917	0.00606399	Inf	0.54747	3	3	division septum assembly
GO:0001558	0.00606399	Inf	0.54747	3	3	regulation of cell growth
GO:1901891	0.00606399	Inf	0.54747	3	3	regulation of cell septum assembly
GO:0050482	0.0332781	Inf	0.36498	2	2	arachidonic acid secretion
GO:0015908	0.0332781	Inf	0.36498	2	2	fatty acid transport
GO:0015909	0.0332781	Inf	0.36498	2	2	long-chain fatty acid transport
GO:0071715	0.0332781	Inf	0.36498	2	2	icosanoid transport
GO:0010207	0.0332781	Inf	0.36498	2	2	photosystem II assembly
GO:0009233	0.0332781	Inf	0.36498	2	2	menaquinone metabolic process
GO:0009234	0.0332781	Inf	0.36498	2	2	menaquinone biosynthetic process
GO:0019464	0.0332781	Inf	0.36498	2	2	glycine decarboxylation via glycine cleavage system
GO:0015801	0.0332781	Inf	0.36498	2	2	aromatic amino acid transport
GO:1903963	0.0332781	Inf	0.36498	2	2	arachidonate transport
GO:0005982	0.0332781	Inf	0.36498	2	2	starch metabolic process
GO:0032309	0.0332781	Inf	0.36498	2	2	icosanoid secretion
GO:0009765	1.16942e-12	43.2807	3.83229	19	21	photosynthesis, light harvesting
GO:0015995	4.46591e-05	31.5507	1.45992	7	8	chlorophyll biosynthetic process
GO:0015994	8.42221e-06	20.3153	2.00739	9	11	chlorophyll metabolic process
GO:0015979	2.23412e-27	19.9068	11.4969	51	63	photosynthesis
GO:0019684	4.59904e-12	15.0092	5.4747	23	30	photosynthesis, light reaction
GO:0022603	0.0209434	13.4729	0.729961	3	4	regulation of anatomical structure morphogenesis
GO:0022604	0.0209434	13.4729	0.729961	3	4	regulation of cell morphogenesis
GO:0048589	0.0209434	13.4729	0.729961	3	4	developmental growth
GO:0048638	0.0209434	13.4729	0.729961	3	4	regulation of developmental growth
GO:0040008	0.0209434	13.4729	0.729961	3	4	regulation of growth
GO:0009733	7.54844e-12	11.4342	6.38716	25	35	response to auxin
GO:0009415	0.00689104	7.49548	1.45992	5	8	response to water
GO:0001101	0.00689104	7.49548	1.45992	5	8	response to acid chemical
GO:0006112	0.00689104	7.49548	1.45992	5	8	energy reserve metabolic process
GO:0005977	0.00689104	7.49548	1.45992	5	8	glycogen metabolic process
GO:0005978	0.00689104	7.49548	1.45992	5	8	glycogen biosynthetic process
GO:0071900	0.0452828	6.73511	0.912451	3	5	regulation of protein serine/threonine kinase activity
GO:1904029	0.0452828	6.73511	0.912451	3	5	regulation of cyclin-dependent protein kinase activity
GO:0034309	0.0452828	6.73511	0.912451	3	5	primary alcohol biosynthetic process
GO:0042126	0.0452828	6.73511	0.912451	3	5	nitrate metabolic process
GO:0042128	0.0452828	6.73511	0.912451	3	5	nitrate assimilation
GO:0000079	0.0452828	6.73511	0.912451	3	5	regulation of cyclin-dependent protein serine/threonine kinase activity
GO:0009228	0.0452828	6.73511	0.912451	3	5	thiamine biosynthetic process
GO:2001057	0.0452828	6.73511	0.912451	3	5	reactive nitrogen species metabolic process
GO:0000902	0.0452828	6.73511	0.912451	3	5	cell morphogenesis
GO:0046434	0.0241942	5.99097	1.27743	4	7	organophosphate catabolic process
GO:0009653	0.0241942	5.99097	1.27743	4	7	anatomical structure morphogenesis
GO:0010411	0.00406782	5.25317	2.37237	7	13	xyloglucan metabolic process
GO:0010383	0.00228597	5.14959	2.73735	8	15	cell wall polysaccharide metabolic process
GO:0010410	0.00228597	5.14959	2.73735	8	15	hemicellulose metabolic process
GO:0010035	0.00228597	5.14959	2.73735	8	15	response to inorganic substance
GO:0006779	0.00122843	4.51135	3.6498	10	20	porphyrin-containing compound biosynthetic process
GO:0046165	0.0123553	4.49864	2.18988	6	12	alcohol biosynthetic process
GO:0006778	0.000640082	4.16938	4.56225	12	25	porphyrin-containing compound metabolic process
GO:0006721	0.0194588	3.8552	2.37237	6	13	terpenoid metabolic process
GO:0016114	0.0194588	3.8552	2.37237	6	13	terpenoid biosynthetic process
GO:0009725	3.01992e-07	3.80897	12.0443	30	66	response to hormone
GO:0009719	3.01992e-07	3.80897	12.0443	30	66	response to endogenous stimulus
GO:0033014	0.000864367	3.67105	5.29221	13	29	tetrapyrrole biosynthetic process
GO:0006662	0.0092798	3.60254	3.28482	8	18	glycerol ether metabolic process
GO:0018904	0.0092798	3.60254	3.28482	8	18	ether metabolic process
GO:1901617	0.0092798	3.60254	3.28482	8	18	organic hydroxy compound biosynthetic process
GO:0033013	0.000431886	3.57136	6.20466	15	34	tetrapyrrole metabolic process
GO:0042221	7.50941e-08	3.46475	15.6942	37	86	response to chemical
GO:0000160	0.00127384	3.45441	5.4747	13	30	phosphorelay signal transduction system
GO:0009664	0.0289024	3.37262	2.55486	6	14	plant-type cell wall organization
GO:0045229	0.00183259	3.26184	5.65719	13	31	external encapsulating structure organization
GO:0071555	0.00183259	3.26184	5.65719	13	31	cell wall organization
GO:0010033	2.90155e-06	3.26087	13.1393	30	72	response to organic substance
GO:0042545	0.0234989	3.14937	3.10233	7	17	cell wall modification
GO:0051128	0.0110728	3.11853	4.01478	9	22	regulation of cellular component organization
GO:0006633	0.00257899	3.08954	5.83968	13	32	fatty acid biosynthetic process
GO:0044264	6.29837e-05	3.03036	10.9494	24	60	cellular polysaccharide metabolic process
GO:0042546	0.0189943	3.00091	3.6498	8	20	cell wall biogenesis
GO:0006073	0.000104497	2.98493	10.5844	23	58	cellular glucan metabolic process
GO:0044042	0.000104497	2.98493	10.5844	23	58	glucan metabolic process
GO:0005976	3.54154e-05	2.92666	12.5918	27	69	polysaccharide metabolic process
GO:0042440	0.00733394	2.91765	5.10972	11	28	pigment metabolic process
GO:0046148	0.0153084	2.89519	4.19727	9	23	pigment biosynthetic process
GO:0072330	0.00289867	2.87437	6.56965	14	36	monocarboxylic acid biosynthetic process
GO:0071554	0.000336689	2.67661	11.3144	23	62	cell wall organization or biogenesis
GO:0030243	0.0343664	2.57117	4.01478	8	22	cellulose metabolic process
GO:0030244	0.0343664	2.57117	4.01478	8	22	cellulose biosynthetic process
GO:0048856	0.00268384	2.56243	8.57704	17	47	anatomical structure development
GO:0006631	0.00671588	2.52791	7.11712	14	39	fatty acid metabolic process
GO:0033692	0.00538168	2.50912	7.66459	15	42	cellular polysaccharide biosynthetic process
GO:0000271	0.00538168	2.50912	7.66459	15	42	polysaccharide biosynthetic process
GO:0032502	0.00179659	2.44754	10.4019	20	57	developmental process
GO:0009250	0.00863673	2.43019	7.29961	14	40	glucan biosynthetic process
GO:0051726	0.0445306	2.39927	4.19727	8	23	regulation of cell cycle
GO:0007275	0.0109663	2.33971	7.4821	14	41	multicellular organism development
GO:0034637	0.00447514	2.26145	10.4019	19	57	cellular carbohydrate biosynthetic process
GO:0044036	0.0442715	2.25	4.92723	9	27	cell wall macromolecule metabolic process
GO:0044262	0.000402146	2.23889	17.1541	31	94	cellular carbohydrate metabolic process
GO:0005975	1.71625e-10	2.1338	71.9011	122	394	carbohydrate metabolic process
GO:0006928	0.0263442	2.09267	7.4821	13	41	movement of cell or subcellular component
GO:0007018	0.0263442	2.09267	7.4821	13	41	microtubule-based movement
GO:0016051	0.00647846	2.06524	12.2268	21	67	carbohydrate biosynthetic process
GO:0007017	0.00559057	1.95236	15.1467	25	83	microtubule-based process
GO:0006091	0.00719532	1.71421	22.6288	34	124	generation of precursor metabolites and energy
GO:0008610	0.0298592	1.49475	25.7311	35	141	lipid biosynthetic process
GO:0006629	0.00807708	1.44245	50.9148	67	279	lipid metabolic process

## Sheet: BIvsBNI_up_BP_GO_enrich
Supplementary table S5 (2). Gene Onthology (GO) terms in the Biological Process (BP) category that are enriched with differentially
expressed and upregulated genes in BABA-treated Fragaria vesca plants infected with Botrytis cinerea versus BABA-treated non-infected plants.
Treatments: BI = BABA-treated and Infected; BNI = BABA-treated and Non-Infected. BABA: β-aminobutyric acid.
GOBPID	P-value	OddsRatio	ExpCount	Count	Size	GOTerm
GO:0006549	0.0258371	Inf	0.321616	2	2	isoleucine metabolic process
GO:0046514	0.0258371	Inf	0.321616	2	2	ceramide catabolic process
GO:0006680	0.0258371	Inf	0.321616	2	2	glucosylceramide catabolic process
GO:0006687	0.0258371	Inf	0.321616	2	2	glycosphingolipid metabolic process
GO:0006677	0.0258371	Inf	0.321616	2	2	glycosylceramide metabolic process
GO:0006678	0.0258371	Inf	0.321616	2	2	glucosylceramide metabolic process
GO:0046466	0.0258371	Inf	0.321616	2	2	membrane lipid catabolic process
GO:0019377	0.0258371	Inf	0.321616	2	2	glycolipid catabolic process
GO:0046477	0.0258371	Inf	0.321616	2	2	glycosylceramide catabolic process
GO:0046479	0.0258371	Inf	0.321616	2	2	glycosphingolipid catabolic process
GO:0030149	0.0258371	Inf	0.321616	2	2	sphingolipid catabolic process
GO:0009097	0.0258371	Inf	0.321616	2	2	isoleucine biosynthetic process
GO:0006084	0.00289988	20.9559	0.804041	4	5	acetyl-CoA metabolic process
GO:0006637	0.00289988	20.9559	0.804041	4	5	acyl-CoA metabolic process
GO:0035383	0.00289988	20.9559	0.804041	4	5	thioester metabolic process
GO:0009611	0.00289988	20.9559	0.804041	4	5	response to wounding
GO:0006085	0.014595	15.7008	0.643233	3	4	acetyl-CoA biosynthetic process
GO:0035384	0.014595	15.7008	0.643233	3	4	thioester biosynthetic process
GO:0071616	0.014595	15.7008	0.643233	3	4	acyl-CoA biosynthetic process
GO:0006026	4.55445e-05	14.0227	1.76889	8	11	aminoglycan catabolic process
GO:0006040	4.55445e-05	14.0227	1.76889	8	11	amino sugar metabolic process
GO:0006030	4.55445e-05	14.0227	1.76889	8	11	chitin metabolic process
GO:0006032	4.55445e-05	14.0227	1.76889	8	11	chitin catabolic process
GO:1901071	4.55445e-05	14.0227	1.76889	8	11	glucosamine-containing compound metabolic process
GO:1901072	4.55445e-05	14.0227	1.76889	8	11	glucosamine-containing compound catabolic process
GO:0046348	4.55445e-05	14.0227	1.76889	8	11	amino sugar catabolic process
GO:0016998	4.55445e-05	14.0227	1.76889	8	11	cell wall macromolecule catabolic process
GO:0006022	0.000117352	10.5149	1.9297	8	12	aminoglycan metabolic process
GO:1902221	0.00759098	10.4759	0.964849	4	6	erythrose 4-phosphate/phosphoenolpyruvate family amino acid metabolic process
GO:0034030	0.00759098	10.4759	0.964849	4	6	ribonucleoside bisphosphate biosynthetic process
GO:0034033	0.00759098	10.4759	0.964849	4	6	purine nucleoside bisphosphate biosynthetic process
GO:0033866	0.00759098	10.4759	0.964849	4	6	nucleoside bisphosphate biosynthetic process
GO:0006558	0.00759098	10.4759	0.964849	4	6	L-phenylalanine metabolic process
GO:0015936	0.00389288	8.73717	1.28647	5	8	coenzyme A metabolic process
GO:0034032	7.26407e-05	7.52175	2.73374	10	17	purine nucleoside bisphosphate metabolic process
GO:0033865	7.26407e-05	7.52175	2.73374	10	17	nucleoside bisphosphate metabolic process
GO:0033875	7.26407e-05	7.52175	2.73374	10	17	ribonucleoside bisphosphate metabolic process
GO:1901136	3.81188e-05	7.24574	3.05535	11	19	carbohydrate derivative catabolic process
GO:0009607	2.45981e-09	7.20625	6.43233	23	40	response to biotic stimulus
GO:0006952	1.01699e-08	4.58287	10.4525	30	65	defense response
GO:0044036	0.000461074	4.21427	4.34182	12	27	cell wall macromolecule metabolic process
GO:0006749	0.0425972	4.1879	1.44727	4	9	glutathione metabolic process
GO:0009072	0.000769601	3.60521	5.14586	13	32	aromatic amino acid family metabolic process
GO:0048544	5.42191e-06	3.49705	10.1309	25	63	recognition of pollen
GO:0008037	5.42191e-06	3.49705	10.1309	25	63	cell recognition
GO:0009856	5.42191e-06	3.49705	10.1309	25	63	pollination
GO:0009875	5.42191e-06	3.49705	10.1309	25	63	pollen-pistil interaction
GO:0044706	5.42191e-06	3.49705	10.1309	25	63	multi-multicellular organism process
GO:0009081	0.0231009	3.49435	2.41212	6	15	branched-chain amino acid metabolic process
GO:0009808	0.0320564	3.1443	2.57293	6	16	lignin metabolic process
GO:0046271	0.0320564	3.1443	2.57293	6	16	phenylpropanoid catabolic process
GO:0046274	0.0320564	3.1443	2.57293	6	16	lignin catabolic process
GO:0009698	0.0320564	3.1443	2.57293	6	16	phenylpropanoid metabolic process
GO:0006979	0.000843924	3.01498	7.07556	16	44	response to oxidative stress
GO:0042908	0.00369932	3.00665	5.30667	12	33	xenobiotic transport
GO:0006855	0.00369932	3.00665	5.30667	12	33	xenobiotic transmembrane transport
GO:0006090	0.00150538	2.92877	6.75394	15	42	pyruvate metabolic process
GO:0009073	0.0429952	2.85789	2.73374	6	17	aromatic amino acid family biosynthetic process
GO:0006720	0.00638532	2.74412	5.62829	12	35	isoprenoid metabolic process
GO:0008299	0.00638532	2.74412	5.62829	12	35	isoprenoid biosynthetic process
GO:0022414	0.000130179	2.70611	11.8998	25	74	reproductive process
GO:0006096	0.0082087	2.62927	5.78909	12	36	glycolytic process
GO:0046031	0.0082087	2.62927	5.78909	12	36	ADP metabolic process
GO:0009185	0.0082087	2.62927	5.78909	12	36	ribonucleoside diphosphate metabolic process
GO:0009179	0.0082087	2.62927	5.78909	12	36	purine ribonucleoside diphosphate metabolic process
GO:0009135	0.0082087	2.62927	5.78909	12	36	purine nucleoside diphosphate metabolic process
GO:0006757	0.0082087	2.62927	5.78909	12	36	ATP generation from ADP
GO:0000003	0.000210411	2.59896	12.2214	25	76	reproduction
GO:0046939	0.00765524	2.53301	6.43233	13	40	nucleotide phosphorylation
GO:0006165	0.00765524	2.53301	6.43233	13	40	nucleoside diphosphate phosphorylation
GO:0044282	0.0194273	2.50037	4.98505	10	31	small molecule catabolic process
GO:0009132	0.00960048	2.44207	6.59313	13	41	nucleoside diphosphate metabolic process
GO:0071554	0.00298362	2.33173	9.97011	19	62	cell wall organization or biogenesis
GO:0016052	0.0118522	2.19269	8.20122	15	51	carbohydrate catabolic process
GO:0009150	0.00164033	2.16861	13.8295	25	86	purine ribonucleotide metabolic process
GO:0019693	0.0023291	2.09893	14.1511	25	88	ribose phosphate metabolic process
GO:0009259	0.0023291	2.09893	14.1511	25	88	ribonucleotide metabolic process
GO:0072521	0.00313016	1.9498	16.724	28	104	purine-containing compound metabolic process
GO:0006163	0.00519483	1.94267	14.9552	25	93	purine nucleotide metabolic process
GO:0032501	0.00419958	1.89905	17.0457	28	106	multicellular organismal process
GO:0016310	3.6712e-09	1.72569	134.114	194	834	phosphorylation
GO:0006468	1.41197e-08	1.71424	125.109	181	778	protein phosphorylation
GO:0009117	0.0135168	1.69955	18.4929	28	115	nucleotide metabolic process
GO:1901135	0.000969998	1.67361	38.4331	57	239	carbohydrate derivative metabolic process
GO:0006753	0.0189772	1.64192	18.9754	28	118	nucleoside phosphate metabolic process
GO:0006950	0.000671432	1.63259	46.1519	67	287	response to stress
GO:0055086	0.0111089	1.62453	23.9604	35	149	nucleobase-containing small molecule metabolic process
GO:0006796	1.71287e-07	1.55402	175.763	234	1093	phosphate-containing compound metabolic process
GO:0006793	1.85831e-07	1.55184	175.924	234	1094	phosphorus metabolic process
GO:0006464	0.000756013	1.32007	181.552	218	1129	cellular protein modification process
GO:0036211	0.000756013	1.32007	181.552	218	1129	protein modification process
GO:0055085	0.0239799	1.28711	76.0623	92	473	transmembrane transport
GO:0043412	0.00879098	1.22899	192.166	220	1195	macromolecule modification
GO:1901564	0.00378878	1.21399	357.477	395	2223	organonitrogen compound metabolic process

## Sheet: NBIvsNBNI_up_BP_GO_enrich
Supplementary table S5 (3). Gene Onthology (GO) terms in the Biological Process (BP) category that are enriched with differentially
expressed and upregulated genes in Fragaria vesca plants infected with Botrytis cinerea versus non-infected plants.
Treatments: NBI = No-BABA and Infected; NBNI = No-BABA and Non-Infected. BABA: β-aminobutyric acid.
GOBPID	P-value	OddsRatio	ExpCount	Count	Size	GOTerm
GO:0042273	0.00593382	Inf	0.543528	3	3	ribosomal large subunit biogenesis
GO:0006549	0.0328004	Inf	0.362352	2	2	isoleucine metabolic process
GO:0046514	0.0328004	Inf	0.362352	2	2	ceramide catabolic process
GO:0006680	0.0328004	Inf	0.362352	2	2	glucosylceramide catabolic process
GO:0006687	0.0328004	Inf	0.362352	2	2	glycosphingolipid metabolic process
GO:0006677	0.0328004	Inf	0.362352	2	2	glycosylceramide metabolic process
GO:0006678	0.0328004	Inf	0.362352	2	2	glucosylceramide metabolic process
GO:0015940	0.0328004	Inf	0.362352	2	2	pantothenate biosynthetic process
GO:0015939	0.0328004	Inf	0.362352	2	2	pantothenate metabolic process
GO:0042274	0.0328004	Inf	0.362352	2	2	ribosomal small subunit biogenesis
GO:0046466	0.0328004	Inf	0.362352	2	2	membrane lipid catabolic process
GO:0019377	0.0328004	Inf	0.362352	2	2	glycolipid catabolic process
GO:0046477	0.0328004	Inf	0.362352	2	2	glycosylceramide catabolic process
GO:0046479	0.0328004	Inf	0.362352	2	2	glycosphingolipid catabolic process
GO:0030149	0.0328004	Inf	0.362352	2	2	sphingolipid catabolic process
GO:0009097	0.0328004	Inf	0.362352	2	2	isoleucine biosynthetic process
GO:0006084	0.0045883	18.1401	0.90588	4	5	acetyl-CoA metabolic process
GO:0006637	0.0045883	18.1401	0.90588	4	5	acyl-CoA metabolic process
GO:0035383	0.0045883	18.1401	0.90588	4	5	thioester metabolic process
GO:0009611	0.0045883	18.1401	0.90588	4	5	response to wounding
GO:0006085	0.0205173	13.5927	0.724704	3	4	acetyl-CoA biosynthetic process
GO:0035384	0.0205173	13.5927	0.724704	3	4	thioester biosynthetic process
GO:0071616	0.0205173	13.5927	0.724704	3	4	acyl-CoA biosynthetic process
GO:0006002	0.00293956	11.3456	1.26823	5	7	fructose 6-phosphate metabolic process
GO:0034030	0.0117895	9.06824	1.08706	4	6	ribonucleoside bisphosphate biosynthetic process
GO:0034033	0.0117895	9.06824	1.08706	4	6	purine nucleoside bisphosphate biosynthetic process
GO:0033866	0.0117895	9.06824	1.08706	4	6	nucleoside bisphosphate biosynthetic process
GO:0006026	0.00105124	7.95324	1.99294	7	11	aminoglycan catabolic process
GO:0006040	0.00105124	7.95324	1.99294	7	11	amino sugar metabolic process
GO:0006030	0.00105124	7.95324	1.99294	7	11	chitin metabolic process
GO:0006032	0.00105124	7.95324	1.99294	7	11	chitin catabolic process
GO:1901071	0.00105124	7.95324	1.99294	7	11	glucosamine-containing compound metabolic process
GO:1901072	0.00105124	7.95324	1.99294	7	11	glucosamine-containing compound catabolic process
GO:0046348	0.00105124	7.95324	1.99294	7	11	amino sugar catabolic process
GO:0016998	0.00105124	7.95324	1.99294	7	11	cell wall macromolecule catabolic process
GO:0006022	0.00212983	6.36131	2.17411	7	12	aminoglycan metabolic process
GO:0034032	0.00122364	5.11803	3.07999	9	17	purine nucleoside bisphosphate metabolic process
GO:0033865	0.00122364	5.11803	3.07999	9	17	nucleoside bisphosphate metabolic process
GO:0033875	0.00122364	5.11803	3.07999	9	17	ribonucleoside bisphosphate metabolic process
GO:0009607	8.6107e-07	5.07277	7.24704	21	40	response to biotic stimulus
GO:1901136	0.000690486	5.05845	3.44235	10	19	carbohydrate derivative catabolic process
GO:0070588	0.0119227	4.53874	2.17411	6	12	calcium ion transmembrane transport
GO:0015936	0.0405071	4.5323	1.44941	4	8	coenzyme A metabolic process
GO:0042254	5.64806e-07	4.01001	10.5082	27	58	ribosome biogenesis
GO:0042908	0.000266606	3.80438	5.97881	15	33	xenobiotic transport
GO:0006855	0.000266606	3.80438	5.97881	15	33	xenobiotic transmembrane transport
GO:0006270	0.034126	3.77884	1.99294	5	11	DNA replication initiation
GO:0006261	0.0088763	3.6347	3.26117	8	18	DNA-templated DNA replication
GO:0006090	0.000167194	3.42926	7.6094	18	42	pyruvate metabolic process
GO:0022613	3.5082e-06	3.39084	11.9576	28	66	ribonucleoprotein complex biogenesis
GO:0006952	8.44565e-06	3.2667	11.7764	27	65	defense response
GO:0006096	0.000832225	3.25893	6.52234	15	36	glycolytic process
GO:0046031	0.000832225	3.25893	6.52234	15	36	ADP metabolic process
GO:0009185	0.000832225	3.25893	6.52234	15	36	ribonucleoside diphosphate metabolic process
GO:0009179	0.000832225	3.25893	6.52234	15	36	purine ribonucleoside diphosphate metabolic process
GO:0009135	0.000832225	3.25893	6.52234	15	36	purine nucleoside diphosphate metabolic process
GO:0006757	0.000832225	3.25893	6.52234	15	36	ATP generation from ADP
GO:0042430	0.0499855	3.23836	2.17411	5	12	indole-containing compound metabolic process
GO:0006568	0.0499855	3.23836	2.17411	5	12	tryptophan metabolic process
GO:0006586	0.0499855	3.23836	2.17411	5	12	indolalkylamine metabolic process
GO:0006979	0.000337695	3.1642	7.97175	18	44	response to oxidative stress
GO:0044036	0.00501595	3.12838	4.89175	11	27	cell wall macromolecule metabolic process
GO:0009072	0.00241118	3.11724	5.79763	13	32	aromatic amino acid family metabolic process
GO:0046939	0.000959842	3.04262	7.24704	16	40	nucleotide phosphorylation
GO:0006165	0.000959842	3.04262	7.24704	16	40	nucleoside diphosphate phosphorylation
GO:0043648	0.0182155	3.0277	3.62352	8	20	dicarboxylic acid metabolic process
GO:0009081	0.0396342	3.024	2.71764	6	15	branched-chain amino acid metabolic process
GO:0009132	0.00131372	2.92033	7.42822	16	41	nucleoside diphosphate metabolic process
GO:0009150	1.98111e-05	2.72836	15.5811	32	86	purine ribonucleotide metabolic process
GO:0006163	1.70019e-05	2.65548	16.8494	34	93	purine nucleotide metabolic process
GO:0048544	0.00039525	2.63275	11.4141	23	63	recognition of pollen
GO:0008037	0.00039525	2.63275	11.4141	23	63	cell recognition
GO:0009856	0.00039525	2.63275	11.4141	23	63	pollination
GO:0009875	0.00039525	2.63275	11.4141	23	63	pollen-pistil interaction
GO:0044706	0.00039525	2.63275	11.4141	23	63	multi-multicellular organism process
GO:0019693	3.38926e-05	2.62985	15.9435	32	88	ribose phosphate metabolic process
GO:0009259	3.38926e-05	2.62985	15.9435	32	88	ribonucleotide metabolic process
GO:0072521	1.49321e-05	2.54776	18.8423	37	104	purine-containing compound metabolic process
GO:0016052	0.00256038	2.48948	9.23998	18	51	carbohydrate catabolic process
GO:0016072	0.0163977	2.37293	6.34116	12	35	rRNA metabolic process
GO:0009308	0.0333022	2.27127	5.43528	10	30	amine metabolic process
GO:0006575	0.0424906	2.27011	4.89175	9	27	cellular modified amino acid metabolic process
GO:0043603	1.55908e-10	2.17408	67.941	117	375	cellular amide metabolic process
GO:0006364	0.0325753	2.1732	6.15999	11	34	rRNA processing
GO:0044282	0.0414436	2.16268	5.61646	10	31	small molecule catabolic process
GO:0043604	7.62331e-10	2.1524	64.1363	110	354	amide biosynthetic process
GO:0009117	0.000386868	2.09526	20.8352	36	115	nucleotide metabolic process
GO:0072522	0.0120801	2.09338	9.78351	17	54	purine-containing compound biosynthetic process
GO:0006720	0.03999	2.08223	6.34116	11	35	isoprenoid metabolic process
GO:0008299	0.03999	2.08223	6.34116	11	35	isoprenoid biosynthetic process
GO:0006412	8.58468e-09	2.0764	61.9622	104	342	translation
GO:0043043	9.739e-09	2.06204	62.8681	105	347	peptide biosynthetic process
GO:0022414	0.00460243	2.06031	13.407	23	74	reproductive process
GO:0006518	5.6739e-09	2.05957	65.4046	109	361	peptide metabolic process
GO:0006164	0.0240304	2.05444	8.15292	14	45	purine nucleotide biosynthetic process
GO:0098660	0.0240304	2.05444	8.15292	14	45	inorganic ion transmembrane transport
GO:0098662	0.0240304	2.05444	8.15292	14	45	inorganic cation transmembrane transport
GO:0098655	0.0240304	2.05444	8.15292	14	45	cation transmembrane transport
GO:0009152	0.0382993	2.01976	7.06587	12	39	purine ribonucleotide biosynthetic process
GO:0006753	0.000666224	2.01737	21.3788	36	118	nucleoside phosphate metabolic process
GO:0071554	0.0112059	2.01446	11.2329	19	62	cell wall organization or biogenesis
GO:0046034	0.0107309	1.98282	11.9576	20	66	ATP metabolic process
GO:0000003	0.00660483	1.98176	13.7694	23	76	reproduction
GO:0055086	0.000774218	1.86719	26.9952	43	149	nucleobase-containing small molecule metabolic process
GO:0034220	0.0385761	1.8437	9.42116	15	52	ion transmembrane transport
GO:1901135	0.000466208	1.69306	43.3011	64	239	carbohydrate derivative metabolic process
GO:0034645	3.11864e-05	1.59662	85.1528	119	470	cellular macromolecule biosynthetic process
GO:1901566	5.2832e-06	1.55197	123.381	167	681	organonitrogen compound biosynthetic process
GO:0016310	6.32389e-06	1.49606	151.101	198	834	phosphorylation
GO:0006950	0.00592919	1.45921	51.9975	69	287	response to stress
GO:0006468	4.15608e-05	1.45523	140.955	182	778	protein phosphorylation
GO:1901564	8.6463e-07	1.3879	402.754	473	2223	organonitrogen compound metabolic process
GO:0019637	0.0318547	1.3762	40.7646	52	225	organophosphate metabolic process
GO:0006796	0.000205961	1.34714	198.025	240	1093	phosphate-containing compound metabolic process
GO:0006793	0.00021904	1.34523	198.207	240	1094	phosphorus metabolic process
GO:0044267	0.000156221	1.31181	278.83	327	1539	cellular protein metabolic process
GO:0006082	0.0331486	1.30617	58.8822	72	325	organic acid metabolic process
GO:0019752	0.0425638	1.28887	57.7952	70	319	carboxylic acid metabolic process
GO:0043436	0.0424432	1.28678	58.7011	71	324	oxoacid metabolic process
GO:0055085	0.0199506	1.28472	85.6963	103	473	transmembrane transport
GO:0044260	0.0055211	1.20291	327.385	363	1807	cellular macromolecule metabolic process
GO:0019538	0.00974865	1.18523	329.197	362	1817	protein metabolic process
GO:0008152	0.0231829	1.16862	810.219	837	4472	metabolic process

## Sheet: NBIvsNBNI_down_BP_GO_enrich
Supplementary table S5 (4). Gene Onthology (GO) terms in the Biological Process (BP) category that are enriched with differentially
expressed and downregulated genes in Fragaria vesca plants infected with Botrytis cinerea versus non-infected plants.
Treatments: NBI = No-BABA and Infected; NBNI = No-BABA and Non-Infected. BABA: β-aminobutyric acid.
GOBPID	P-value	OddsRatio	ExpCount	Count	Size	GOTerm
GO:0015979	6.91728e-29	21.7462	10.7208	51	63	photosynthesis
GO:0019684	5.79704e-14	19.9447	5.10512	24	30	photosynthesis, light reaction
GO:0009765	3.15174e-13	47.1731	3.57359	19	21	photosynthesis, light harvesting
GO:0009733	1.70354e-11	10.8681	5.95598	24	35	response to auxin
GO:0005975	3.7775e-10	2.13612	67.0473	115	394	carbohydrate metabolic process
GO:0042221	1.48035e-07	3.42863	14.6347	35	86	response to chemical
GO:0009725	2.47847e-07	3.90335	11.2313	29	66	response to hormone
GO:0009719	2.47847e-07	3.90335	11.2313	29	66	response to endogenous stimulus
GO:0010033	2.23277e-06	3.35468	12.2523	29	72	response to organic substance
GO:0071554	3.64586e-05	3.12919	10.5506	24	62	cell wall organization or biogenesis
GO:0006928	4.88464e-05	3.86615	6.977	18	41	movement of cell or subcellular component
GO:0007018	4.88464e-05	3.86615	6.977	18	41	microtubule-based movement
GO:0007017	5.56027e-05	2.66545	14.1242	29	83	microtubule-based process
GO:0015994	6.96765e-05	13.0973	1.87188	8	11	chlorophyll metabolic process
GO:0010411	0.000393436	7.85525	2.21222	8	13	xyloglucan metabolic process
GO:0015995	0.000491203	14.7087	1.36137	6	8	chlorophyll biosynthetic process
GO:0000160	0.000641449	3.76373	5.10512	13	30	phosphorelay signal transduction system
GO:0045229	0.000934886	3.55393	5.2753	13	31	external encapsulating structure organization
GO:0071555	0.000934886	3.55393	5.2753	13	31	cell wall organization
GO:0010383	0.00142643	5.60867	2.55256	8	15	cell wall polysaccharide metabolic process
GO:0010410	0.00142643	5.60867	2.55256	8	15	hemicellulose metabolic process
GO:0051128	0.00175131	4.09357	3.74376	10	22	regulation of cellular component organization
GO:0006091	0.00229098	1.87079	21.1012	34	124	generation of precursor metabolites and energy
GO:0033013	0.00255286	3.04441	5.78581	13	34	tetrapyrrole metabolic process
GO:0051726	0.00263208	3.77793	3.91393	10	23	regulation of cell cycle
GO:0005976	0.00409797	2.1569	11.7418	21	69	polysaccharide metabolic process
GO:0051510	0.00491599	Inf	0.510512	3	3	regulation of unidimensional cell growth
GO:0051513	0.00491599	Inf	0.510512	3	3	regulation of monopolar cell growth
GO:0032506	0.00491599	Inf	0.510512	3	3	cytokinetic process
GO:0042814	0.00491599	Inf	0.510512	3	3	monopolar cell growth
GO:0090529	0.00491599	Inf	0.510512	3	3	cell septum assembly
GO:0009826	0.00491599	Inf	0.510512	3	3	unidimensional cell growth
GO:0032954	0.00491599	Inf	0.510512	3	3	regulation of cytokinetic process
GO:0032955	0.00491599	Inf	0.510512	3	3	regulation of division septum assembly
GO:0060560	0.00491599	Inf	0.510512	3	3	developmental growth involved in morphogenesis
GO:0000917	0.00491599	Inf	0.510512	3	3	division septum assembly
GO:0001558	0.00491599	Inf	0.510512	3	3	regulation of cell growth
GO:1901891	0.00491599	Inf	0.510512	3	3	regulation of cell septum assembly
GO:0009415	0.00503189	8.16198	1.36137	5	8	response to water
GO:0001101	0.00503189	8.16198	1.36137	5	8	response to acid chemical
GO:0006778	0.00543236	3.2729	4.25427	10	25	porphyrin-containing compound metabolic process
GO:0006629	0.00567502	1.48133	47.4777	64	279	lipid metabolic process
GO:0033014	0.00578772	3.0013	4.93495	11	29	tetrapyrrole biosynthetic process
GO:1901617	0.00600902	3.92374	3.06307	8	18	organic hydroxy compound biosynthetic process
GO:0006073	0.00606556	2.21552	9.86991	18	58	cellular glucan metabolic process
GO:0044042	0.00606556	2.21552	9.86991	18	58	glucan metabolic process
GO:0044262	0.00632274	1.88678	15.9961	26	94	cellular carbohydrate metabolic process
GO:0010035	0.0073546	4.28912	2.55256	7	15	response to inorganic substance
GO:0044264	0.00890597	2.10918	10.2102	18	60	cellular polysaccharide metabolic process
GO:0044036	0.0101425	2.88671	4.59461	10	27	cell wall macromolecule metabolic process
GO:0032502	0.0115472	2.09038	9.69974	17	57	developmental process
GO:0042546	0.0126008	3.26848	3.40342	8	20	cell wall biogenesis
GO:0006779	0.0126008	3.26848	3.40342	8	20	porphyrin-containing compound biosynthetic process
GO:0072330	0.0128293	2.45508	6.12615	12	36	monocarboxylic acid biosynthetic process
GO:0006633	0.0132401	2.57101	5.44547	11	32	fatty acid biosynthetic process
GO:0019318	0.0132401	2.57101	5.44547	11	32	hexose metabolic process
GO:0042440	0.0134268	2.7258	4.76478	10	28	pigment metabolic process
GO:0006721	0.0139105	4.19834	2.21222	6	13	terpenoid metabolic process
GO:0016114	0.0139105	4.19834	2.21222	6	13	terpenoid biosynthetic process
GO:0042545	0.0162731	3.42993	2.8929	7	17	cell wall modification
GO:0006546	0.0171603	14.6689	0.680683	3	4	glycine catabolic process
GO:0015969	0.0171603	14.6689	0.680683	3	4	guanosine tetraphosphate metabolic process
GO:0022603	0.0171603	14.6689	0.680683	3	4	regulation of anatomical structure morphogenesis
GO:0022604	0.0171603	14.6689	0.680683	3	4	regulation of cell morphogenesis
GO:0048589	0.0171603	14.6689	0.680683	3	4	developmental growth
GO:0048638	0.0171603	14.6689	0.680683	3	4	regulation of developmental growth
GO:0040008	0.0171603	14.6689	0.680683	3	4	regulation of growth
GO:0034035	0.0171603	14.6689	0.680683	3	4	purine ribonucleoside bisphosphate metabolic process
GO:0009071	0.0171603	14.6689	0.680683	3	4	serine family amino acid catabolic process
GO:0009653	0.0189163	6.52326	1.1912	4	7	anatomical structure morphogenesis
GO:0009664	0.0209023	3.67282	2.38239	6	14	plant-type cell wall organization
GO:0048856	0.021094	2.08344	7.99803	14	47	anatomical structure development
GO:0006662	0.0228047	3.1175	3.06307	7	18	glycerol ether metabolic process
GO:0018904	0.0228047	3.1175	3.06307	7	18	ether metabolic process
GO:0006631	0.0245804	2.18099	6.63666	12	39	fatty acid metabolic process
GO:0005996	0.0263465	2.24829	5.95598	11	35	monosaccharide metabolic process
GO:0016051	0.0279346	1.80534	11.4014	18	67	carbohydrate biosynthetic process
GO:0050482	0.0289349	Inf	0.340342	2	2	arachidonic acid secretion
GO:0015908	0.0289349	Inf	0.340342	2	2	fatty acid transport
GO:0015909	0.0289349	Inf	0.340342	2	2	long-chain fatty acid transport
GO:0051667	0.0289349	Inf	0.340342	2	2	establishment of plastid localization
GO:0051644	0.0289349	Inf	0.340342	2	2	plastid localization
GO:0009902	0.0289349	Inf	0.340342	2	2	chloroplast relocation
GO:0071715	0.0289349	Inf	0.340342	2	2	icosanoid transport
GO:0010207	0.0289349	Inf	0.340342	2	2	photosystem II assembly
GO:0009233	0.0289349	Inf	0.340342	2	2	menaquinone metabolic process
GO:0009234	0.0289349	Inf	0.340342	2	2	menaquinone biosynthetic process
GO:0015801	0.0289349	Inf	0.340342	2	2	aromatic amino acid transport
GO:1903963	0.0289349	Inf	0.340342	2	2	arachidonate transport
GO:0032309	0.0289349	Inf	0.340342	2	2	icosanoid secretion
GO:0019750	0.0289349	Inf	0.340342	2	2	chloroplast localization
GO:0010564	0.0299341	3.26408	2.55256	6	15	regulation of cell cycle process
GO:0046148	0.0306081	2.61323	3.91393	8	23	pigment biosynthetic process
GO:0006112	0.0328007	4.89147	1.36137	4	8	energy reserve metabolic process
GO:0005977	0.0328007	4.89147	1.36137	4	8	glycogen metabolic process
GO:0005978	0.0328007	4.89147	1.36137	4	8	glycogen biosynthetic process
GO:0071900	0.037491	7.33301	0.850854	3	5	regulation of protein serine/threonine kinase activity
GO:1904029	0.037491	7.33301	0.850854	3	5	regulation of cyclin-dependent protein kinase activity
GO:0042126	0.037491	7.33301	0.850854	3	5	nitrate metabolic process
GO:0042128	0.037491	7.33301	0.850854	3	5	nitrate assimilation
GO:0000079	0.037491	7.33301	0.850854	3	5	regulation of cyclin-dependent protein serine/threonine kinase activity
GO:2001057	0.037491	7.33301	0.850854	3	5	reactive nitrogen species metabolic process
GO:0042822	0.037491	7.33301	0.850854	3	5	pyridoxal phosphate metabolic process
GO:0042823	0.037491	7.33301	0.850854	3	5	pyridoxal phosphate biosynthetic process
GO:0046184	0.037491	7.33301	0.850854	3	5	aldehyde biosynthetic process
GO:0000902	0.037491	7.33301	0.850854	3	5	cell morphogenesis
GO:0046165	0.0392631	3.49522	2.04205	5	12	alcohol biosynthetic process
GO:0006869	0.040817	2.63684	3.40342	7	20	lipid transport
GO:0008610	0.0480873	1.44537	23.9941	32	141	lipid biosynthetic process

## Sheet: BIvsNBI_down_BP_GO_enrich
Supplementary table S5 (5). Gene Onthology (GO) terms in the Biological Process (BP) category that are enriched with differentially
expressed and downregulated genes in BABA-treated Fragaria vesca plants infected with Botrytis cinerea versus untreated and infected plants.
Treatments: BI = BABA-treated and Infected; NBI = No BABA and Infected. BABA: β-aminobutyric acid.
GOBPID	P-value	OddsRatio	ExpCount	Count	Size	GOTerm
GO:0015996	0.00246224	760.125	0.00246386	1	3	chlorophyll catabolic process
GO:0046149	0.00246224	760.125	0.00246386	1	3	pigment catabolic process
GO:0009765	3.5226e-07	505.417	0.017247	3	21	photosynthesis, light harvesting
GO:0033015	0.00410104	379.938	0.00410644	1	5	tetrapyrrole catabolic process
GO:0006787	0.00410104	379.938	0.00410644	1	5	porphyrin-containing compound catabolic process
GO:0019684	1.07293e-06	336.444	0.0246386	3	30	photosynthesis, light reaction
GO:0015994	0.00900453	151.825	0.00903417	1	11	chlorophyll metabolic process
GO:0015979	1.04089e-05	150.575	0.0517411	3	63	photosynthesis
GO:0006091	8.00629e-05	73.9091	0.10184	3	124	generation of precursor metabolites and energy
GO:0006778	0.0203709	63.1146	0.0205322	1	25	porphyrin-containing compound metabolic process
GO:0042440	0.0227929	56.0741	0.0229961	1	28	pigment metabolic process
GO:0046700	0.026819	47.2734	0.0271025	1	33	heterocycle catabolic process
GO:0033013	0.0276226	45.8333	0.0279238	1	34	tetrapyrrole metabolic process
GO:0044270	0.0276226	45.8333	0.0279238	1	34	cellular nitrogen compound catabolic process
GO:1901361	0.0419972	29.5686	0.042707	1	52	organic cyclic compound catabolic process
GO:0019439	0.0419972	29.5686	0.042707	1	52	aromatic compound catabolic process

## Sheet: BIvsNBNI_up_BP_GO_enrich
Supplementary table S5 (6). Gene Onthology (GO) terms in the Biological Process (BP) category that are enriched with differentially
expressed and upregulated genes in BABA-treated Fragaria vesca plants infected with Botrytis cinerea versus untreated and non-infected plants.
Treatments: BI = BABA-treated and Infected; NBNI = No BABA and Non-Infected. BABA: β-aminobutyric acid.
GOBPID	P-value	OddsRatio	ExpCount	Count	Size	GOTerm
GO:0006549	0.0328004	Inf	0.362352	2	2	isoleucine metabolic process
GO:0046514	0.0328004	Inf	0.362352	2	2	ceramide catabolic process
GO:0006680	0.0328004	Inf	0.362352	2	2	glucosylceramide catabolic process
GO:0006687	0.0328004	Inf	0.362352	2	2	glycosphingolipid metabolic process
GO:0006677	0.0328004	Inf	0.362352	2	2	glycosylceramide metabolic process
GO:0006678	0.0328004	Inf	0.362352	2	2	glucosylceramide metabolic process
GO:0046466	0.0328004	Inf	0.362352	2	2	membrane lipid catabolic process
GO:0019377	0.0328004	Inf	0.362352	2	2	glycolipid catabolic process
GO:0046477	0.0328004	Inf	0.362352	2	2	glycosylceramide catabolic process
GO:0046479	0.0328004	Inf	0.362352	2	2	glycosphingolipid catabolic process
GO:0030149	0.0328004	Inf	0.362352	2	2	sphingolipid catabolic process
GO:0009097	0.0328004	Inf	0.362352	2	2	isoleucine biosynthetic process
GO:0006084	0.0045883	18.1401	0.90588	4	5	acetyl-CoA metabolic process
GO:0006637	0.0045883	18.1401	0.90588	4	5	acyl-CoA metabolic process
GO:0035383	0.0045883	18.1401	0.90588	4	5	thioester metabolic process
GO:0009611	0.0045883	18.1401	0.90588	4	5	response to wounding
GO:0006085	0.0205173	13.5927	0.724704	3	4	acetyl-CoA biosynthetic process
GO:0035384	0.0205173	13.5927	0.724704	3	4	thioester biosynthetic process
GO:0071616	0.0205173	13.5927	0.724704	3	4	acyl-CoA biosynthetic process
GO:0006026	0.000111302	12.1327	1.99294	8	11	aminoglycan catabolic process
GO:0006040	0.000111302	12.1327	1.99294	8	11	amino sugar metabolic process
GO:0006030	0.000111302	12.1327	1.99294	8	11	chitin metabolic process
GO:0006032	0.000111302	12.1327	1.99294	8	11	chitin catabolic process
GO:1901071	0.000111302	12.1327	1.99294	8	11	glucosamine-containing compound metabolic process
GO:1901072	0.000111302	12.1327	1.99294	8	11	glucosamine-containing compound catabolic process
GO:0046348	0.000111302	12.1327	1.99294	8	11	amino sugar catabolic process
GO:0016998	0.000111302	12.1327	1.99294	8	11	cell wall macromolecule catabolic process
GO:0006022	0.000280822	9.09772	2.17411	8	12	aminoglycan metabolic process
GO:0034030	0.0117895	9.06824	1.08706	4	6	ribonucleoside bisphosphate biosynthetic process
GO:0034033	0.0117895	9.06824	1.08706	4	6	purine nucleoside bisphosphate biosynthetic process
GO:0033866	0.0117895	9.06824	1.08706	4	6	nucleoside bisphosphate biosynthetic process
GO:0009607	4.01356e-09	6.90778	7.24704	24	40	response to biotic stimulus
GO:1901136	0.00011954	6.26683	3.44235	11	19	carbohydrate derivative catabolic process
GO:0006270	0.00702625	5.44758	1.99294	6	11	DNA replication initiation
GO:0034032	0.00122364	5.11803	3.07999	9	17	purine nucleoside bisphosphate metabolic process
GO:0033865	0.00122364	5.11803	3.07999	9	17	nucleoside bisphosphate metabolic process
GO:0033875	0.00122364	5.11803	3.07999	9	17	ribonucleoside bisphosphate metabolic process
GO:0006261	0.00205729	4.54845	3.26117	9	18	DNA-templated DNA replication
GO:0070588	0.0119227	4.53874	2.17411	6	12	calcium ion transmembrane transport
GO:0015936	0.0405071	4.5323	1.44941	4	8	coenzyme A metabolic process
GO:0006952	4.04763e-08	4.21096	11.7764	31	65	defense response
GO:0044036	0.00139977	3.64436	4.89175	12	27	cell wall macromolecule metabolic process
GO:0009072	0.000687617	3.5475	5.79763	14	32	aromatic amino acid family metabolic process
GO:0048544	1.42413e-05	3.22839	11.4141	26	63	recognition of pollen
GO:0008037	1.42413e-05	3.22839	11.4141	26	63	cell recognition
GO:0009856	1.42413e-05	3.22839	11.4141	26	63	pollination
GO:0009875	1.42413e-05	3.22839	11.4141	26	63	pollen-pistil interaction
GO:0044706	1.42413e-05	3.22839	11.4141	26	63	multi-multicellular organism process
GO:0009073	0.0226332	3.17746	3.07999	7	17	aromatic amino acid family biosynthetic process
GO:0009081	0.0396342	3.024	2.71764	6	15	branched-chain amino acid metabolic process
GO:0044282	0.00559833	2.87481	5.61646	12	31	small molecule catabolic process
GO:0006090	0.00177144	2.80744	7.6094	16	42	pyruvate metabolic process
GO:0042908	0.00989964	2.59997	5.97881	12	33	xenobiotic transport
GO:0006855	0.00989964	2.59997	5.97881	12	33	xenobiotic transmembrane transport
GO:0006096	0.0078853	2.57304	6.52234	13	36	glycolytic process
GO:0046031	0.0078853	2.57304	6.52234	13	36	ADP metabolic process
GO:0009185	0.0078853	2.57304	6.52234	13	36	ribonucleoside diphosphate metabolic process
GO:0009179	0.0078853	2.57304	6.52234	13	36	purine ribonucleoside diphosphate metabolic process
GO:0009135	0.0078853	2.57304	6.52234	13	36	purine nucleoside diphosphate metabolic process
GO:0006757	0.0078853	2.57304	6.52234	13	36	ATP generation from ADP
GO:0022414	0.00034212	2.48302	13.407	26	74	reproductive process
GO:0046939	0.00809598	2.452	7.24704	14	40	nucleotide phosphorylation
GO:0006165	0.00809598	2.452	7.24704	14	40	nucleoside diphosphate phosphorylation
GO:0000003	0.000549775	2.38273	13.7694	26	76	reproduction
GO:0009132	0.0102936	2.36071	7.42822	14	41	nucleoside diphosphate metabolic process
GO:0006979	0.00817592	2.35611	7.97175	15	44	response to oxidative stress
GO:0098660	0.0102607	2.27711	8.15292	15	45	inorganic ion transmembrane transport
GO:0098662	0.0102607	2.27711	8.15292	15	45	inorganic cation transmembrane transport
GO:0098655	0.0102607	2.27711	8.15292	15	45	cation transmembrane transport
GO:0034220	0.00805099	2.21389	9.42116	17	52	ion transmembrane transport
GO:0071554	0.00501843	2.17342	11.2329	20	62	cell wall organization or biogenesis
GO:0009150	0.00190291	2.09505	15.5811	27	86	purine ribonucleotide metabolic process
GO:0006720	0.03999	2.08223	6.34116	11	35	isoprenoid metabolic process
GO:0008299	0.03999	2.08223	6.34116	11	35	isoprenoid biosynthetic process
GO:0016052	0.0151736	2.08175	9.23998	16	51	carbohydrate catabolic process
GO:0019693	0.00275252	2.02553	15.9435	27	88	ribose phosphate metabolic process
GO:0009259	0.00275252	2.02553	15.9435	27	88	ribonucleotide metabolic process
GO:0006163	0.00314583	1.97152	16.8494	28	93	purine nucleotide metabolic process
GO:0072521	0.00231392	1.94582	18.8423	31	104	purine-containing compound metabolic process
GO:0043603	2.13405e-07	1.89084	67.941	107	375	cellular amide metabolic process
GO:0042254	0.0247532	1.88762	10.5082	17	58	ribosome biogenesis
GO:0006518	4.46338e-06	1.77753	65.4046	99	361	peptide metabolic process
GO:0043604	5.82643e-06	1.77385	64.1363	97	354	amide biosynthetic process
GO:0006412	2.2822e-05	1.72352	61.9622	92	342	translation
GO:0043043	2.41078e-05	1.71507	62.8681	93	347	peptide biosynthetic process
GO:0022613	0.0424091	1.70634	11.9576	18	66	ribonucleoprotein complex biogenesis
GO:1901135	0.00136561	1.61783	43.3011	62	239	carbohydrate derivative metabolic process
GO:0009117	0.0203656	1.61175	20.8352	30	115	nucleotide metabolic process
GO:0016310	1.74304e-07	1.59332	151.101	206	834	phosphorylation
GO:0006468	5.46257e-07	1.58212	140.955	192	778	protein phosphorylation
GO:0032501	0.0356826	1.5583	19.2047	27	106	multicellular organismal process
GO:0006753	0.0285924	1.55585	21.3788	30	118	nucleoside phosphate metabolic process
GO:0055086	0.023391	1.51016	26.9952	37	149	nucleobase-containing small molecule metabolic process
GO:0006950	0.0038727	1.48893	51.9975	70	287	response to stress
GO:0006796	1.34364e-05	1.42111	198.025	248	1093	phosphate-containing compound metabolic process
GO:0006793	1.44453e-05	1.41909	198.207	248	1094	phosphorus metabolic process
GO:0034645	0.00227759	1.40459	85.1528	109	470	cellular macromolecule biosynthetic process
GO:1901564	2.34213e-06	1.36894	402.754	470	2223	organonitrogen compound metabolic process
GO:1901566	0.0013137	1.35949	123.381	153	681	organonitrogen compound biosynthetic process
GO:0055085	0.00571223	1.35579	85.6963	107	473	transmembrane transport
GO:0044267	4.75211e-05	1.34057	278.83	331	1539	cellular protein metabolic process
GO:0044260	0.00186642	1.23378	327.385	368	1807	cellular macromolecule metabolic process
GO:0006464	0.00894354	1.22221	204.548	233	1129	cellular protein modification process
GO:0036211	0.00894354	1.22221	204.548	233	1129	protein modification process
GO:0019538	0.00658156	1.19732	329.197	364	1817	protein metabolic process
GO:0043412	0.0402196	1.15808	216.505	238	1195	macromolecule modification

## Sheet: BIvsNBNI_down_BP_GO_enrich
Supplementary table S5 (7). Gene Onthology (GO) terms in the Biological Process (BP) category that are enriched with differentially
expressed and downregulated genes in BABA-treated Fragaria vesca plants infected with Botrytis cinerea versus untreated and non-infected plants.
Treatments: BI = BABA-treated and Infected; NBNI = No BABA and Non-Infected. BABA: β-aminobutyric acid.
GOBPID	P-value	OddsRatio	ExpCount	Count	Size	GOTerm
GO:0006546	0.00105717	Inf	0.722076	4	4	glycine catabolic process
GO:0009071	0.00105717	Inf	0.722076	4	4	serine family amino acid catabolic process
GO:0051510	0.00586944	Inf	0.541557	3	3	regulation of unidimensional cell growth
GO:0051513	0.00586944	Inf	0.541557	3	3	regulation of monopolar cell growth
GO:0032506	0.00586944	Inf	0.541557	3	3	cytokinetic process
GO:0042814	0.00586944	Inf	0.541557	3	3	monopolar cell growth
GO:0090529	0.00586944	Inf	0.541557	3	3	cell septum assembly
GO:0009826	0.00586944	Inf	0.541557	3	3	unidimensional cell growth
GO:0032954	0.00586944	Inf	0.541557	3	3	regulation of cytokinetic process
GO:0032955	0.00586944	Inf	0.541557	3	3	regulation of division septum assembly
GO:0060560	0.00586944	Inf	0.541557	3	3	developmental growth involved in morphogenesis
GO:0000917	0.00586944	Inf	0.541557	3	3	division septum assembly
GO:0001558	0.00586944	Inf	0.541557	3	3	regulation of cell growth
GO:1901891	0.00586944	Inf	0.541557	3	3	regulation of cell septum assembly
GO:0050482	0.0325628	Inf	0.361038	2	2	arachidonic acid secretion
GO:0015908	0.0325628	Inf	0.361038	2	2	fatty acid transport
GO:0015909	0.0325628	Inf	0.361038	2	2	long-chain fatty acid transport
GO:0051667	0.0325628	Inf	0.361038	2	2	establishment of plastid localization
GO:0051644	0.0325628	Inf	0.361038	2	2	plastid localization
GO:0009902	0.0325628	Inf	0.361038	2	2	chloroplast relocation
GO:0031122	0.0325628	Inf	0.361038	2	2	cytoplasmic microtubule organization
GO:0071715	0.0325628	Inf	0.361038	2	2	icosanoid transport
GO:0010207	0.0325628	Inf	0.361038	2	2	photosystem II assembly
GO:0009233	0.0325628	Inf	0.361038	2	2	menaquinone metabolic process
GO:0009234	0.0325628	Inf	0.361038	2	2	menaquinone biosynthetic process
GO:0019464	0.0325628	Inf	0.361038	2	2	glycine decarboxylation via glycine cleavage system
GO:0015801	0.0325628	Inf	0.361038	2	2	aromatic amino acid transport
GO:1903963	0.0325628	Inf	0.361038	2	2	arachidonate transport
GO:0032309	0.0325628	Inf	0.361038	2	2	icosanoid secretion
GO:0019750	0.0325628	Inf	0.361038	2	2	chloroplast localization
GO:0009765	9.54083e-13	43.8671	3.7909	19	21	photosynthesis, light harvesting
GO:0015995	4.14664e-05	31.9744	1.44415	7	8	chlorophyll biosynthetic process
GO:0015979	6.30186e-29	22.476	11.3727	52	63	photosynthesis
GO:0015994	7.66764e-06	20.5885	1.98571	9	11	chlorophyll metabolic process
GO:0019684	2.26028e-13	18.5414	5.41557	24	30	photosynthesis, light reaction
GO:0015969	0.0203062	13.6533	0.722076	3	4	guanosine tetraphosphate metabolic process
GO:0022603	0.0203062	13.6533	0.722076	3	4	regulation of anatomical structure morphogenesis
GO:0022604	0.0203062	13.6533	0.722076	3	4	regulation of cell morphogenesis
GO:0048589	0.0203062	13.6533	0.722076	3	4	developmental growth
GO:0048638	0.0203062	13.6533	0.722076	3	4	regulation of developmental growth
GO:0040008	0.0203062	13.6533	0.722076	3	4	regulation of growth
GO:0034035	0.0203062	13.6533	0.722076	3	4	purine ribonucleoside bisphosphate metabolic process
GO:0009733	6.2589e-11	10.1033	6.31817	24	35	response to auxin
GO:0009415	0.00656375	7.59598	1.44415	5	8	response to water
GO:0001101	0.00656375	7.59598	1.44415	5	8	response to acid chemical
GO:0006112	0.00656375	7.59598	1.44415	5	8	energy reserve metabolic process
GO:0005977	0.00656375	7.59598	1.44415	5	8	glycogen metabolic process
GO:0005978	0.00656375	7.59598	1.44415	5	8	glycogen biosynthetic process
GO:0071900	0.0439784	6.82527	0.902595	3	5	regulation of protein serine/threonine kinase activity
GO:1904029	0.0439784	6.82527	0.902595	3	5	regulation of cyclin-dependent protein kinase activity
GO:0034309	0.0439784	6.82527	0.902595	3	5	primary alcohol biosynthetic process
GO:0042126	0.0439784	6.82527	0.902595	3	5	nitrate metabolic process
GO:0042128	0.0439784	6.82527	0.902595	3	5	nitrate assimilation
GO:0000079	0.0439784	6.82527	0.902595	3	5	regulation of cyclin-dependent protein serine/threonine kinase activity
GO:0009228	0.0439784	6.82527	0.902595	3	5	thiamine biosynthetic process
GO:2001057	0.0439784	6.82527	0.902595	3	5	reactive nitrogen species metabolic process
GO:0000902	0.0439784	6.82527	0.902595	3	5	cell morphogenesis
GO:0031109	0.0232907	6.07123	1.26363	4	7	microtubule polymerization or depolymerization
GO:0046434	0.0232907	6.07123	1.26363	4	7	organophosphate catabolic process
GO:0007020	0.0232907	6.07123	1.26363	4	7	microtubule nucleation
GO:0046785	0.0232907	6.07123	1.26363	4	7	microtubule polymerization
GO:0009653	0.0232907	6.07123	1.26363	4	7	anatomical structure morphogenesis
GO:0006721	0.00381507	5.32372	2.34675	7	13	terpenoid metabolic process
GO:0016114	0.00381507	5.32372	2.34675	7	13	terpenoid biosynthetic process
GO:0010035	0.00212549	5.2188	2.70779	8	15	response to inorganic substance
GO:0006779	0.00112497	4.57208	3.61038	10	20	porphyrin-containing compound biosynthetic process
GO:0046165	0.0117106	4.55901	2.16623	6	12	alcohol biosynthetic process
GO:0006778	0.000577391	4.2256	4.51298	12	25	porphyrin-containing compound metabolic process
GO:0010383	0.01024	3.99119	2.70779	7	15	cell wall polysaccharide metabolic process
GO:0010410	0.01024	3.99119	2.70779	7	15	hemicellulose metabolic process
GO:0010411	0.0184783	3.90694	2.34675	6	13	xyloglucan metabolic process
GO:0009725	2.35777e-07	3.86109	11.9143	30	66	response to hormone
GO:0009719	2.35777e-07	3.86109	11.9143	30	66	response to endogenous stimulus
GO:0033014	0.00077631	3.72059	5.23505	13	29	tetrapyrrole biosynthetic process
GO:1901617	0.00867976	3.65096	3.24934	8	18	organic hydroxy compound biosynthetic process
GO:0033013	0.000382119	3.61963	6.13765	15	34	tetrapyrrole metabolic process
GO:0046148	0.00413174	3.51487	4.15194	10	23	pigment biosynthetic process
GO:0042221	5.59107e-08	3.51243	15.5246	37	86	response to chemical
GO:0000160	0.00114646	3.50103	5.41557	13	30	phosphorelay signal transduction system
GO:0042440	0.00198581	3.43123	5.05453	12	28	pigment metabolic process
GO:0009664	0.0274971	3.41789	2.52727	6	14	plant-type cell wall organization
GO:0045229	0.00165279	3.30586	5.59609	13	31	external encapsulating structure organization
GO:0071555	0.00165279	3.30586	5.59609	13	31	cell wall organization
GO:0010033	2.29631e-06	3.30549	12.9974	30	72	response to organic substance
GO:0051338	0.0492976	3.25281	2.16623	5	12	regulation of transferase activity
GO:0042545	0.0222093	3.19167	3.06882	7	17	cell wall modification
GO:0051128	0.0103098	3.16048	3.97142	9	22	regulation of cellular component organization
GO:0006662	0.030819	2.90093	3.24934	7	18	glycerol ether metabolic process
GO:0018904	0.030819	2.90093	3.24934	7	18	ether metabolic process
GO:0006633	0.0072907	2.74278	5.77661	12	32	fatty acid biosynthetic process
GO:0072330	0.00764325	2.58459	6.49869	13	36	monocarboxylic acid biosynthetic process
GO:0071554	0.000782049	2.52734	11.1922	22	62	cell wall organization or biogenesis
GO:0051726	0.0420512	2.43153	4.15194	8	23	regulation of cell cycle
GO:0006631	0.0158575	2.28499	7.04024	13	39	fatty acid metabolic process
GO:0006928	0.0242462	2.12092	7.40128	13	41	movement of cell or subcellular component
GO:0007018	0.0242462	2.12092	7.40128	13	41	microtubule-based movement
GO:0007017	0.00224961	2.09663	14.9831	26	83	microtubule-based process
GO:0005975	2.88934e-08	1.94643	71.1245	114	394	carbohydrate metabolic process
GO:0032502	0.0202265	1.94392	10.2896	17	57	developmental process
GO:0048856	0.033658	1.93783	8.4844	14	47	anatomical structure development
GO:0005976	0.0170922	1.8687	12.4558	20	69	polysaccharide metabolic process
GO:0006091	0.00325214	1.81106	22.3844	35	124	generation of precursor metabolites and energy
GO:0044264	0.0329322	1.8072	10.8311	17	60	cellular polysaccharide metabolic process
GO:0034637	0.0409825	1.78294	10.2896	16	57	cellular carbohydrate biosynthetic process
GO:0044262	0.0135634	1.75355	16.9688	26	94	cellular carbohydrate metabolic process
GO:0006073	0.0474696	1.74014	10.4701	16	58	cellular glucan metabolic process
GO:0044042	0.0474696	1.74014	10.4701	16	58	glucan metabolic process
GO:0016051	0.047066	1.67872	12.0948	18	67	carbohydrate biosynthetic process
GO:0008610	0.0257617	1.51533	25.4532	35	141	lipid biosynthetic process
GO:0006629	0.0139904	1.40266	50.3648	65	279	lipid metabolic process

## Sheet: BNIvsNBI_up_BP_GO_enrich
Supplementary table S5 (8). Gene Onthology (GO) terms in the Biological Process (BP) category that are enriched with differentially
expressed and upregulated genes in BABA-treated and uninfected Fragaria vesca plants versus untreated and Botrytis cinerea-infected plants.
Treatments: BNI = BABA-treated and Non-Infected; NBI = No BABA and Infected. BABA: β-aminobutyric acid.
GOBPID	P-value	OddsRatio	ExpCount	Count	Size	GOTerm
GO:0051510	0.00410964	Inf	0.480946	3	3	regulation of unidimensional cell growth
GO:0051513	0.00410964	Inf	0.480946	3	3	regulation of monopolar cell growth
GO:0032506	0.00410964	Inf	0.480946	3	3	cytokinetic process
GO:0042814	0.00410964	Inf	0.480946	3	3	monopolar cell growth
GO:0090529	0.00410964	Inf	0.480946	3	3	cell septum assembly
GO:0009826	0.00410964	Inf	0.480946	3	3	unidimensional cell growth
GO:0032954	0.00410964	Inf	0.480946	3	3	regulation of cytokinetic process
GO:0032955	0.00410964	Inf	0.480946	3	3	regulation of division septum assembly
GO:0060560	0.00410964	Inf	0.480946	3	3	developmental growth involved in morphogenesis
GO:0000917	0.00410964	Inf	0.480946	3	3	division septum assembly
GO:0001558	0.00410964	Inf	0.480946	3	3	regulation of cell growth
GO:1901891	0.00410964	Inf	0.480946	3	3	regulation of cell septum assembly
GO:0050482	0.0256789	Inf	0.320631	2	2	arachidonic acid secretion
GO:0015908	0.0256789	Inf	0.320631	2	2	fatty acid transport
GO:0015909	0.0256789	Inf	0.320631	2	2	long-chain fatty acid transport
GO:0071715	0.0256789	Inf	0.320631	2	2	icosanoid transport
GO:0010207	0.0256789	Inf	0.320631	2	2	photosystem II assembly
GO:0009233	0.0256789	Inf	0.320631	2	2	menaquinone metabolic process
GO:0009234	0.0256789	Inf	0.320631	2	2	menaquinone biosynthetic process
GO:0015801	0.0256789	Inf	0.320631	2	2	aromatic amino acid transport
GO:1903963	0.0256789	Inf	0.320631	2	2	arachidonate transport
GO:0032309	0.0256789	Inf	0.320631	2	2	icosanoid secretion
GO:0009765	1.0267e-13	50.7262	3.36662	19	21	photosynthesis, light harvesting
GO:0015979	3.50481e-30	23.4324	10.0999	51	63	photosynthesis
GO:0019684	2.70321e-13	17.6008	4.80946	23	30	photosynthesis, light reaction
GO:0015995	0.000349889	15.8041	1.28252	6	8	chlorophyll biosynthetic process
GO:0006546	0.0144671	15.7585	0.641261	3	4	glycine catabolic process
GO:0022603	0.0144671	15.7585	0.641261	3	4	regulation of anatomical structure morphogenesis
GO:0022604	0.0144671	15.7585	0.641261	3	4	regulation of cell morphogenesis
GO:0048589	0.0144671	15.7585	0.641261	3	4	developmental growth
GO:0048638	0.0144671	15.7585	0.641261	3	4	regulation of developmental growth
GO:0040008	0.0144671	15.7585	0.641261	3	4	regulation of growth
GO:0009071	0.0144671	15.7585	0.641261	3	4	serine family amino acid catabolic process
GO:0015994	4.45038e-05	14.0744	1.76347	8	11	chlorophyll metabolic process
GO:0009733	4.9061e-11	10.2571	5.61104	23	35	response to auxin
GO:0009415	0.00383887	8.76931	1.28252	5	8	response to water
GO:0001101	0.00383887	8.76931	1.28252	5	8	response to acid chemical
GO:0010411	0.000256417	8.44132	2.0841	8	13	xyloglucan metabolic process
GO:0071900	0.0318692	7.8777	0.801577	3	5	regulation of protein serine/threonine kinase activity
GO:1904029	0.0318692	7.8777	0.801577	3	5	regulation of cyclin-dependent protein kinase activity
GO:0034309	0.0318692	7.8777	0.801577	3	5	primary alcohol biosynthetic process
GO:0042126	0.0318692	7.8777	0.801577	3	5	nitrate metabolic process
GO:0042128	0.0318692	7.8777	0.801577	3	5	nitrate assimilation
GO:0000079	0.0318692	7.8777	0.801577	3	5	regulation of cyclin-dependent protein serine/threonine kinase activity
GO:0009228	0.0318692	7.8777	0.801577	3	5	thiamine biosynthetic process
GO:2001057	0.0318692	7.8777	0.801577	3	5	reactive nitrogen species metabolic process
GO:0000902	0.0318692	7.8777	0.801577	3	5	cell morphogenesis
GO:0009653	0.0153006	7.00823	1.12221	4	7	anatomical structure morphogenesis
GO:0010383	0.000948385	6.02715	2.40473	8	15	cell wall polysaccharide metabolic process
GO:0010410	0.000948385	6.02715	2.40473	8	15	hemicellulose metabolic process
GO:0046165	0.00646036	5.26392	1.92378	6	12	alcohol biosynthetic process
GO:0006112	0.0267623	5.25514	1.28252	4	8	energy reserve metabolic process
GO:0005977	0.0267623	5.25514	1.28252	4	8	glycogen metabolic process
GO:0005978	0.0267623	5.25514	1.28252	4	8	glycogen biosynthetic process
GO:0010035	0.00523442	4.60888	2.40473	7	15	response to inorganic substance
GO:0006779	0.00211365	4.31597	3.20631	9	20	porphyrin-containing compound biosynthetic process
GO:1901617	0.00411453	4.21653	2.88568	8	18	organic hydroxy compound biosynthetic process
GO:0050793	0.0421692	4.20329	1.44284	4	9	regulation of developmental process
GO:0009725	6.50094e-08	4.20032	10.5808	29	66	response to hormone
GO:0009719	6.50094e-08	4.20032	10.5808	29	66	response to endogenous stimulus
GO:0006778	0.000859973	4.15085	4.00788	11	25	porphyrin-containing compound metabolic process
GO:0000160	0.000352064	4.04587	4.80946	13	30	phosphorelay signal transduction system
GO:0009664	0.0157589	3.94639	2.24442	6	14	plant-type cell wall organization
GO:0045229	0.000518447	3.82035	4.96978	13	31	external encapsulating structure organization
GO:0071555	0.000518447	3.82035	4.96978	13	31	cell wall organization
GO:0033014	0.000979416	3.73078	4.64915	12	29	tetrapyrrole biosynthetic process
GO:0033013	0.000398158	3.7052	5.45072	14	34	tetrapyrrole metabolic process
GO:0042221	3.15575e-08	3.691	13.7871	35	86	response to chemical
GO:0042545	0.0118034	3.68566	2.72536	7	17	cell wall modification
GO:0051128	0.0046272	3.65054	3.52694	9	22	regulation of cellular component organization
GO:0010033	6.26005e-07	3.60996	11.5427	29	72	response to organic substance
GO:0042546	0.008796	3.5124	3.20631	8	20	cell wall biogenesis
GO:0042440	0.00260934	3.41634	4.48883	11	28	pigment metabolic process
GO:0046148	0.00653928	3.38913	3.68725	9	23	pigment biosynthetic process
GO:0051726	0.00653928	3.38913	3.68725	9	23	regulation of cell cycle
GO:0071554	1.30572e-05	3.36621	9.93955	24	62	cell wall organization or biogenesis
GO:0006662	0.0166963	3.34994	2.88568	7	18	glycerol ether metabolic process
GO:0018904	0.0166963	3.34994	2.88568	7	18	ether metabolic process
GO:0006633	0.00267665	3.16929	5.13009	12	32	fatty acid biosynthetic process
GO:0044036	0.00662631	3.10255	4.32852	10	27	cell wall macromolecule metabolic process
GO:0048856	0.000606181	3.00292	7.53482	17	47	anatomical structure development
GO:0072330	0.00266268	2.98691	5.77135	13	36	monocarboxylic acid biosynthetic process
GO:0032502	0.000327632	2.8695	9.13798	20	57	developmental process
GO:0071669	0.0424271	2.86842	2.72536	6	17	plant-type cell wall organization or biogenesis
GO:0007275	0.00336624	2.74082	6.57293	14	41	multicellular organism development
GO:0006928	0.00336624	2.74082	6.57293	14	41	movement of cell or subcellular component
GO:0007018	0.00336624	2.74082	6.57293	14	41	microtubule-based movement
GO:0019318	0.0238297	2.39507	5.13009	10	32	hexose metabolic process
GO:0006631	0.0158011	2.3444	6.2523	12	39	fatty acid metabolic process
GO:0007017	0.000894206	2.29069	13.3062	25	83	microtubule-based process
GO:0005975	8.7312e-11	2.22025	63.1643	112	394	carbohydrate metabolic process
GO:0006073	0.00769108	2.1925	9.29829	17	58	cellular glucan metabolic process
GO:0044042	0.00769108	2.1925	9.29829	17	58	glucan metabolic process
GO:0005976	0.00462048	2.16164	11.0618	20	69	polysaccharide metabolic process
GO:0005996	0.0433102	2.10642	5.61104	10	35	monosaccharide metabolic process
GO:0044264	0.0110161	2.0897	9.61892	17	60	cellular polysaccharide metabolic process
GO:0006091	0.00164265	1.93086	19.8791	33	124	generation of precursor metabolites and energy
GO:0044262	0.0114957	1.81585	15.0696	24	94	cellular carbohydrate metabolic process
GO:0006629	0.0187511	1.39827	44.728	58	279	lipid metabolic process

## Sheet: BNIvsNBI_down_BP_GO_enrich
Supplementary table S5 (9). Gene Onthology (GO) terms in the Biological Process (BP) category that are enriched with differentially
expressed and downregulated genes in BABA-treated and uninfected Fragaria vesca plants versus untreated and Botrytis cinerea-infected plants.
Treatments: BNI = BABA-treated and Non-Infected; NBI = No BABA and Infected. BABA: β-aminobutyric acid.
GOBPID	P-value	OddsRatio	ExpCount	Count	Size	GOTerm
GO:0042273	0.0040093	Inf	0.477004	3	3	ribosomal large subunit biogenesis
GO:0006549	0.0252594	Inf	0.318003	2	2	isoleucine metabolic process
GO:0046514	0.0252594	Inf	0.318003	2	2	ceramide catabolic process
GO:0006680	0.0252594	Inf	0.318003	2	2	glucosylceramide catabolic process
GO:0006687	0.0252594	Inf	0.318003	2	2	glycosphingolipid metabolic process
GO:0006677	0.0252594	Inf	0.318003	2	2	glycosylceramide metabolic process
GO:0006678	0.0252594	Inf	0.318003	2	2	glucosylceramide metabolic process
GO:0015940	0.0252594	Inf	0.318003	2	2	pantothenate biosynthetic process
GO:0015939	0.0252594	Inf	0.318003	2	2	pantothenate metabolic process
GO:0042274	0.0252594	Inf	0.318003	2	2	ribosomal small subunit biogenesis
GO:0046466	0.0252594	Inf	0.318003	2	2	membrane lipid catabolic process
GO:0019377	0.0252594	Inf	0.318003	2	2	glycolipid catabolic process
GO:0046477	0.0252594	Inf	0.318003	2	2	glycosylceramide catabolic process
GO:0046479	0.0252594	Inf	0.318003	2	2	glycosphingolipid catabolic process
GO:0030149	0.0252594	Inf	0.318003	2	2	sphingolipid catabolic process
GO:0009097	0.0252594	Inf	0.318003	2	2	isoleucine biosynthetic process
GO:0006084	0.00277613	21.2407	0.795007	4	5	acetyl-CoA metabolic process
GO:0006637	0.00277613	21.2407	0.795007	4	5	acyl-CoA metabolic process
GO:0035383	0.00277613	21.2407	0.795007	4	5	thioester metabolic process
GO:0009611	0.00277613	21.2407	0.795007	4	5	response to wounding
GO:0006085	0.0141298	15.914	0.636005	3	4	acetyl-CoA biosynthetic process
GO:0035384	0.0141298	15.914	0.636005	3	4	thioester biosynthetic process
GO:0071616	0.0141298	15.914	0.636005	3	4	acyl-CoA biosynthetic process
GO:1902221	0.00727894	10.6183	0.954008	4	6	erythrose 4-phosphate/phosphoenolpyruvate family amino acid metabolic process
GO:0034030	0.00727894	10.6183	0.954008	4	6	ribonucleoside bisphosphate biosynthetic process
GO:0034033	0.00727894	10.6183	0.954008	4	6	purine nucleoside bisphosphate biosynthetic process
GO:0033866	0.00727894	10.6183	0.954008	4	6	nucleoside bisphosphate biosynthetic process
GO:0006558	0.00727894	10.6183	0.954008	4	6	L-phenylalanine metabolic process
GO:0015936	0.00369764	8.85601	1.27201	5	8	coenzyme A metabolic process
GO:0034032	6.57149e-05	7.62452	2.70302	10	17	purine nucleoside bisphosphate metabolic process
GO:0033865	6.57149e-05	7.62452	2.70302	10	17	nucleoside bisphosphate metabolic process
GO:0033875	6.57149e-05	7.62452	2.70302	10	17	ribonucleoside bisphosphate metabolic process
GO:0009607	1.37074e-08	6.59173	6.36005	22	40	response to biotic stimulus
GO:0006026	0.00357439	6.38046	1.74901	6	11	aminoglycan catabolic process
GO:0006040	0.00357439	6.38046	1.74901	6	11	amino sugar metabolic process
GO:0006030	0.00357439	6.38046	1.74901	6	11	chitin metabolic process
GO:0006032	0.00357439	6.38046	1.74901	6	11	chitin catabolic process
GO:1901071	0.00357439	6.38046	1.74901	6	11	glucosamine-containing compound metabolic process
GO:1901072	0.00357439	6.38046	1.74901	6	11	glucosamine-containing compound catabolic process
GO:0046348	0.00357439	6.38046	1.74901	6	11	amino sugar catabolic process
GO:0016998	0.00357439	6.38046	1.74901	6	11	cell wall macromolecule catabolic process
GO:0006022	0.00619568	5.31601	1.90802	6	12	aminoglycan metabolic process
GO:1901136	0.00127297	4.79562	3.02102	9	19	carbohydrate derivative catabolic process
GO:0006270	0.020116	4.42541	1.74901	5	11	DNA replication initiation
GO:0006952	3.55367e-08	4.3615	10.3351	29	65	defense response
GO:0015914	0.041041	4.24481	1.43101	4	9	phospholipid transport
GO:0015748	0.041041	4.24481	1.43101	4	9	organophosphate ester transport
GO:0006749	0.041041	4.24481	1.43101	4	9	glutathione metabolic process
GO:0042908	0.000250764	3.93987	5.24704	14	33	xenobiotic transport
GO:0006855	0.000250764	3.93987	5.24704	14	33	xenobiotic transmembrane transport
GO:0009073	0.0112861	3.72216	2.70302	7	17	aromatic amino acid family biosynthetic process
GO:0009072	0.000688651	3.65462	5.08804	13	32	aromatic amino acid family metabolic process
GO:0009081	0.0219227	3.54193	2.38502	6	15	branched-chain amino acid metabolic process
GO:0006261	0.0159845	3.38312	2.86202	7	18	DNA-templated DNA replication
GO:0048544	1.55563e-05	3.31226	10.0171	24	63	recognition of pollen
GO:0008037	1.55563e-05	3.31226	10.0171	24	63	cell recognition
GO:0009856	1.55563e-05	3.31226	10.0171	24	63	pollination
GO:0009875	1.55563e-05	3.31226	10.0171	24	63	pollen-pistil interaction
GO:0044706	1.55563e-05	3.31226	10.0171	24	63	multi-multicellular organism process
GO:0006090	0.000406277	3.29282	6.67806	16	42	pyruvate metabolic process
GO:0009808	0.0304718	3.18711	2.54402	6	16	lignin metabolic process
GO:0046271	0.0304718	3.18711	2.54402	6	16	phenylpropanoid catabolic process
GO:0046274	0.0304718	3.18711	2.54402	6	16	lignin catabolic process
GO:0009698	0.0304718	3.18711	2.54402	6	16	phenylpropanoid metabolic process
GO:0044036	0.00624268	3.13337	4.29304	10	27	cell wall macromolecule metabolic process
GO:0006096	0.00246886	3.01666	5.72405	13	36	glycolytic process
GO:0046031	0.00246886	3.01666	5.72405	13	36	ADP metabolic process
GO:0009185	0.00246886	3.01666	5.72405	13	36	ribonucleoside diphosphate metabolic process
GO:0009179	0.00246886	3.01666	5.72405	13	36	purine ribonucleoside diphosphate metabolic process
GO:0009135	0.00246886	3.01666	5.72405	13	36	purine nucleoside diphosphate metabolic process
GO:0006757	0.00246886	3.01666	5.72405	13	36	ATP generation from ADP
GO:0046939	0.00239325	2.87518	6.36005	14	40	nucleotide phosphorylation
GO:0006165	0.00239325	2.87518	6.36005	14	40	nucleoside diphosphate phosphorylation
GO:0006720	0.00581968	2.7817	5.56505	12	35	isoprenoid metabolic process
GO:0008299	0.00581968	2.7817	5.56505	12	35	isoprenoid biosynthetic process
GO:0009132	0.00311311	2.76815	6.51905	14	41	nucleoside diphosphate metabolic process
GO:0006979	0.00228268	2.76314	6.99606	15	44	response to oxidative stress
GO:0006575	0.0195989	2.66006	4.29304	9	27	cellular modified amino acid metabolic process
GO:0042254	0.00108624	2.60839	9.22208	19	58	ribosome biogenesis
GO:0022414	0.000299187	2.57797	11.7661	24	74	reproductive process
GO:0000003	0.000467282	2.47784	12.0841	24	76	reproduction
GO:0009150	0.000235012	2.46127	13.6741	27	86	purine ribonucleotide metabolic process
GO:0019693	0.000356761	2.37963	13.9921	27	88	ribose phosphate metabolic process
GO:0009259	0.000356761	2.37963	13.9921	27	88	ribonucleotide metabolic process
GO:0022613	0.00236776	2.3271	10.4941	20	66	ribonucleoprotein complex biogenesis
GO:0006163	0.000395094	2.31653	14.7871	28	93	purine nucleotide metabolic process
GO:0072521	0.000240111	2.28735	16.5361	31	104	purine-containing compound metabolic process
GO:0016052	0.0107074	2.22281	8.10907	15	51	carbohydrate catabolic process
GO:0044282	0.0468686	2.17471	4.92904	9	31	small molecule catabolic process
GO:0071554	0.0142351	2.01601	9.85808	17	62	cell wall organization or biogenesis
GO:0009117	0.00157116	1.98348	18.2852	31	115	nucleotide metabolic process
GO:0006753	0.00244627	1.91395	18.7622	31	118	nucleoside phosphate metabolic process
GO:0055086	0.00152755	1.84386	23.6912	38	149	nucleobase-containing small molecule metabolic process
GO:0032501	0.00707189	1.8309	16.8541	27	106	multicellular organismal process
GO:1901135	0.000731355	1.6976	38.0013	57	239	carbohydrate derivative metabolic process
GO:0032787	0.0286832	1.67774	14.6281	22	92	monocarboxylic acid metabolic process
GO:0006950	0.00137041	1.58815	45.6334	65	287	response to stress
GO:0016310	4.67234e-06	1.53325	132.607	178	834	phosphorylation
GO:0006468	2.54739e-05	1.49696	123.703	164	778	protein phosphorylation
GO:0006796	3.29235e-05	1.42047	173.788	219	1093	phosphate-containing compound metabolic process
GO:0006793	3.50946e-05	1.41851	173.947	219	1094	phosphorus metabolic process
GO:0019637	0.0260589	1.41684	35.7753	47	225	organophosphate metabolic process
GO:0006082	0.0176637	1.37329	51.6754	66	325	organic acid metabolic process
GO:0043436	0.0236501	1.35099	51.5164	65	324	oxoacid metabolic process
GO:0019752	0.0245974	1.35069	50.7214	64	319	carboxylic acid metabolic process
GO:0044281	0.0457266	1.23173	83.7937	98	527	small molecule metabolic process
GO:1901564	0.00555074	1.20376	353.46	389	2223	organonitrogen compound metabolic process
